# Supplementary material for: Triple Immunoglobulin Gene Knockout Transchromosomic Cattle: Bovine Lambda Cluster Deletion and Its Effect on Fully Human Polyclonal Antibody Production
Source: PLoS One. 2014 Mar 6;9(3):e90383. doi: 10.1371/journal.pone.0090383 (PMC3946162; doi:10.1371/journal.pone.0090383)
Supplement: Figure S3 — The complete 141C2 BAC sequence is shown. Bovine IGLJ1-IGLC1 is located at 9480-9517 and 10791-11110. Bovine IGLJ2-IGLC2 is located at 15707-15744 and 17048-17367. Bovine IGLJ3-IGLC3 is located at 22023-22060 and 23364-23683. Bovine IGLJ4-IGLC4 is located at 28820-28857 and 30153-30472. Bovine IGLJ5-IGLC5 is located at 35097-35134 and 36422-36740. These sequence regions are underlined in red. (GBK) [file pone.0090383.s003.gbk]

LOCUS       Supplementary_Sequence_141C2         160971 bp    DNA     linear       28-OCT-2013

...
FEATURES             Location/Qualifiers
     misc_feature    9480..9517
                     /note="IGLJ1"
     misc_feature    10791..11110
                     /note="IGLC1"
     misc_feature    15707..15744
                     /note="IGLJ2"
     misc_feature    17048..17347
                     /note="IGLC2"
     misc_feature    22023..22060
                     /note="IGLJ3"
     misc_feature    23364..23683
                     /note="IGLC3"
     misc_feature    28820..28857
                     /note="IGLJ4"
     misc_feature    30153..30472
                     /note="IGLC4"
     misc_feature    35097..35134
                     /note="IGLJ5"
     misc_feature    36422..36740
                     /note="IGLC5"
     misc_feature    28215..36957
                     /note="CL5 KO vector long arm"
     misc_feature    36958..38502
                     /note="CL5 KO vector short arm"
     misc_feature    50389..51201
                     /note="3' enhancer"
     misc_feature    9185..12431
                     /note="CL1 KO vector short arm"
     misc_feature    1..9184
                     /note="CL1 KO vector long arm"
     source          1..160971
                     /dnas_title="Supplementary sequence_141C2"
ORIGIN      
        1 AGGGACAGTC CCTTTTTCTC CCTGAAACCT GGGGCTGTCC CGGGGGCCAC CGCAGCCTCC
       61 AGGCAGCGGG GGGACCCAGC CCCCAATATG TGAGAAGAGC AGGTCCCAGG CTGGAGAGAG
      121 CGAAGCACCA TGGTGGGGAG AAGTTAGACT GGATCGGGGC CCCTAGGGGC TCCCCCGGAC
      181 CTGCACGGCA GCCGTCAGGG CACCCGCACC CCATTGCTGT TCAGTGCTGG CCAGTGTCCA
      241 AGGCCAGGGA TGTGTGTGTG TGTGTGTGCG TGCGTGCGTG CGTGTGTGTG TGCGTGTGTG
      301 CGCGTGCATG CGTGTGTGTG TGTGTGCGTG CGTGTGCGTG CGTAGACGTG TGCGTGCGTG
      361 CGTGCGTGCG TGCGTGTGTG TGCGCACGCG CGCAGCCCAG CTTCAGCACT GGACCAGGCA
      421 GCCTGGGATT CCTCCAAAAC TGCCTTGTGA GTTTGGTCAA ACCGTGAGGC TCTGATCACC
      481 GCCATCCATT CGCCCCCTCC TGCCCCCCTC ATCACCGTGG TTGTTGTCAT TATCGAGAGC
      541 TGTGGAGGGT CTGGGAGGTC ATCCCACCTG CCAGCTAAAC CGTGAGGCTG CCGCAATCGC
      601 ACTGATGCGG GCAGACCCGA GACGCTGTGC CGGAGACGAA GGCCAGCTTG TCACCCCGCC
      661 AGAGCGGCAG TCGGGCCACA AGCATCATCC AAGCAGTGGT TCTCTGAGCC CGACGGGGTG
      721 ATGCAAAGGA GCCAGGAGAC ACCTGCGCGT CCAAGCTGGG GGACCCCAGG TCTGTTATGC
      781 CGGACAGTAA ACACGTTCAG CTCCGGAGGG AGAGGGTTCC CCTACCTTCC AGGGTTTCTC
      841 ATTCCACAAA CATCCAAAGA CAATCCATAC CGAAGGCGAT CCGTGCCTTT GCTCCTGAGA
      901 CGTGCGGAAG CACAGAGATC CACAGACACT GTCTCCCAGG ATCCTATGTA TGTAAAGGAA
      961 CCGAAGTCCC AGGCTGTGTG TCTGGTACCA CATCCCACGG AACAGGCTGG ACTGATTTTC
     1021 ACCAAATGTA GCAGAAACGT TAAGGAGTAT CAGCTTCAAA ATATGAGGGC CAGACATGTC
     1081 TGAGAAGTCC CTTCCAGAAA AGTCCCTTTG GGGTCCTTCC CCAGAGTTGC TGAAACAGAG
     1141 AACCGGAAGG GCTGCAGAGC TGAACTTAAA CAACTGGATC GCAAAGGTCC GTCTCATCAG
     1201 AGCGATGGTT TTTCCAGTGG TCATGTATGG ATGAGAGAGT TGGACCATAA AGAAAGCTGA
     1261 GCGCCGAAGA ATCGATGCTT TTGAACTCTG GTGTTGGAGA AGACTCTTGA GAGTCCCTTG
     1321 GACTGCAAGG AGATCCAACC AGTCAATCCT AAAGGAAATC AATCCTGAAT ATTCATGGGA
     1381 AGGACTGATG CTGAAGCTGA AACTCCAATA CTTTGGCCAC TTGATGCAAA GAACTGACTC
     1441 ACTGGAAAAA CCCTGATGCT GGGAAAGGTT GAAGGCAGGA GGAGAAGGGG TCGACAGAGG
     1501 ATGAGATGGT TGGGTGGCAT CACCCACCCA TGGACTCAAT GGACATGGGT TTGAGTAAAC
     1561 TCTGGGAGTT GGTGATGGAC AGAGAATCCT GGCATGCTGC GGTCCATGGG GTCATAGAGA
     1621 GTCAGACACA ACTGAGCGAC TGACAGAACT GAAGCAACTG GCAAGCCGGA GGGTAGGTGC
     1681 CGGCTGCGAT GAGCGGGAAC GTGCAACCTG CCACGTGGAG CTCTTCCTAC ACCCAGAGTC
     1741 CTGACGGCAC TGGGACCCTA GCCCTCCACG GCCTCTCCAG GGCCACGAGA CACCCTCACA
     1801 GAGCAGAGAA GCGGAACAGA GCTGGTGTGC AGAACCAGGC CCCGGGGGTG GGGCGGGGCT
     1861 GGTGGGCAGG CTTTAGTGAG AAGCCCTTGA GCCCTGGAAC CAGAGCAGAG CAGAACAGTT
     1921 GGCAGAGGCC CCCCCGGGAG AGGCCCCCCG CCCAGAGTAC CGGCCCTGGG CCCTGGGGGA
     1981 GAGGGCGGTG CTGGGGGCAG GGACAGAAGG CCCAGGCAGA GGATGGGCCC CGTGGGACGG
     2041 GGCGCACCAA AACAGCCCCT GCCAGCAAGG GGAAGCTGGG GCACTTTCGA CCCCCTCCAA
     2101 GGAGGAGCCC ACACCAGCGC ATCTGCCCAA GGTGCCCTTG GCCCTGGGGG CACATGAGGC
     2161 CCAGGCCAGG CCAGGGGGCC CATGAGGCCC CCAGGGGTCA GTGCAGTGTC CCCAGGCAGC
     2221 CCTGGCCTCT CATCCTGCTG GGCCTGGCCT CTTATCCCGT GGGCGCCCAC GGCCTGCTGC
     2281 CCCCGACGGC GGCGCCTCAG AGCACAGCCC CCCGCATGGA AGCCCCGTCA GGAAAGAGCC
     2341 CTTGGAGCCT GCAGGACAGG TAAGGGCCGA GGGAGTCATG GTGCAGGGAA GTGGGGCTTC
     2401 CCTTCGATGG GACCCAGGGG TGAATGACCG CAGGGGCGGG GAACGAGAAG GGAAACCAGC
     2461 TGGAGAGAAG GAGCCTGGGC AGACGTGGCT GCACGCACAG CGCTGACCCT GGGCCCAGTG
     2521 TGCCTTTGTG TTGGGTTTTA TTTTTAATTT TGTATTGAGA TGCTATTTAT CTCGTGGAGC
     2581 TTTTGGCGCC CTGAGATTTT GTACCCGTGG CTGGTGTCCC TCTTGCCTCA CCCCGGCCCT
     2641 CTGAGCAGGG CAGACACGGC GCAACGGGGC AGGGCGTGCC CAGGAGGCAC TGATCATTTT
     2701 GGGGGCAGCG GCCCCACAAG GCAGGTCTGC CTTCCTCCCC TTCTTACAGG CAGCGACAGA
     2761 GGTCCAGAGA GGTGAGGCAA GCTGCCCAAT GTCACACAGC ACACGGGCGC AGTCCCAGGA
     2821 CTGTAGAAAT CCCGGGACTA GACAGGCACC AGAGTGTCCT GTGTTTTAAG AAAACGGCCC
     2881 AAGAGAAGAG GCAAGTCTGC AAGGCGTCCC GGGAAGGCAG CAGGGGCTTG GCTCGGTCTC
     2941 CCCCAAGGAG GCCAGCTCCT CAGCGAGGTT CCTAAGTGTC TAACGGAGCC AAGCCTGAAC
     3001 CAAGGGGTCA CGTGCAGCTA TGGGACACTG ACCTGGGATG GGGGAGCTCC AGGCAAAGGG
     3061 AGTAGGGAGG CCAAGGAGGA GAGAGGGGTG CACAGGCCTG CAGGGAGCTT CCAGAGCTGG
     3121 GGAAAACGGG GTTCAGACCA CGGGGTCATG TCCACCCCTC CTTTATCCTG GGATCCGGGG
     3181 CAGGTATTGA GGGATTTATG TGCGGGGCTG TCAGGGTCCA GTTCGTGCTG TGGAAAAATT
     3241 GTTTCAGATC AGAGACCAGC GTGAGGTCAG GTTAGAGGAT GGAGAAGAAG CTGTGAAAAG
     3301 GTGATGGAGA GCGGGGGGAC GGTCCTCGGT GATCAGGCAC CGAGATCGCC CATGGAATCC
     3361 GCAGGCGAAT TTACAGTGAC GTCGTCAGAG GGCTGTCGGG GAGGAACAGG CACTGTCATG
     3421 AACTGGCTAC AAAAATCTAA AATGTGCACC CTTTTCGGCA ATATGCAGCA AGTCATAAAA
     3481 GAAAACGCAT TTCTTTAAAA TTGCGTAATT CCGCTTTTAG GAATTCATCT GGGGGCGGGG
     3541 GAACAATCAA AAAGATGTGA CCAAAGGTTT ACAAGCCAGG AAGTCAACTC GTTAATGATG
     3601 GGAGAAAACC GGAAATAACC TGAATATCCA ACAGAAAGGG TGTGATGAAG CGCAGCATGG
     3661 CACATCCACC GCAAGGAATC CTAACACAAA CTTCCAAAAC AATATTTCTG AAGTTGGGTT
     3721 TTTAAAGCAT GCGTGCACTT TCAAAAGCTT GTCAGAAAAC ATAGAAATAT GACAATAATG
     3781 TGTCTCTAGC CAAATTTTTT AATTTTTGCT TTATAATTTT ATAAAGTTAT AATTGTATGA
     3841 AATATAATGA TAAAATTATA AACTATAAAA AAGTTATGAA AATGTTCACA AGAAGATATA
     3901 CATGTAATTT TATCTTCTAC AATACTTTTT AATACCAGAA TAACGTGCTT TTAAAAAAGA
     3961 TTGAGCACAG AAGCGTATAA AGTAAAAATT GAGAGTTTCT GCTCACCAAC CACACGTCTT
     4021 ACCTTAAAAC CCATTCTCCA GCGAGAGACA GTGTCATGTG GGTCTGTACA CTTCTGGCCT
     4081 TTCTCCTAGG CATGTATGTC CCTGAAAACT CACACACACG GCTAATGGTG CTGGGATTTT
     4141 AGTTTTCAAA ACGGACTCAT ACTCTGCCTA TGAGCCTGCA ACTATTTATT CAGTCTGTTG
     4201 AGATTTTCTA TATCAGCCCA CATGGATCCC GCATGTTCTC TGAATGGCTC TGTATGAATT
     4261 CAAAGTTTGG AAGAAGCAGC GTGTCTTTAA TCATTCGCCT ATTAATGGAC GTTTGGGGTG
     4321 TTTCCACTAC AAAACGTAAA TTACGAGAGA TGCTACGTGG AAACCCCCAC GTGCGTAGCT
     4381 ATGTGCCCGT ACTTTGTACG CTTTGTCTCC CTGGAAAGAT GCCTAAAAAT GGGGTGCTGG
     4441 GTCAGAGAGA ACACGCTTTG AAATTTTCAT AGGAGATGCC AACGGTCCTC CCAAAAGTCT
     4501 GCTCCAGCTC CCGTTCCCTG CAGCCAGGGA CAGTGCTTTT TCCTCTCCAT TCTCGAAATG
     4561 ATGTGGCGTT TGGATCTGTT TTTATTTTGT GCGTTTTTCC TCTCCATTCT CGCAATGATG
     4621 TGACGTTTGG ATCTGTTTTT ATTTTCGCGT TTTTCCTCTC CATTCTCACC AATAATGTGA
     4681 CATTTGGATC TTTTTTTATT TTGCACGTCT GAAGAGCAAA AATGAGAACA AAACTGTTTG
     4741 CCGTTTGCTT GATTGTTGGT GAAGTTTATT TTCCTTTCAT ATTTTTATTG ATTGACTTTA
     4801 TTTCTTCTGT GAATGTACCG GTTGTAATTT TGTCTGGTTT ATTTTTTGTT CGGTTGGTTG
     4861 TACTTTATAG AAACTCTTCA TCCATTTGGG ATAGTAACCC CTCGTTAAGT ATGTATGTGC
     4921 TAAATATGTT TCCCTGATCT GTTTTCCAGT TTCATCTGTG GGGTCTTTCA ACACTAAGGC
     4981 TTTTTAATTT TTACATGTCA GATCGGTTGT TTTTCTTTAT GGTGTTTGTG AGCTGTGGAA
     5041 AGCATAGGAA AGACATTTCT ATTTTGATTT TTTTTTAATT TTATTCAGGT ACTTCTATTG
     5101 TTTTGGTGTT TATTTTTACT TCACCTAAAA TTTATTTTTG TGTCGGTAGA AATGTATCCT
     5161 TACATATTTT CAAATGGGAA ACCAGTCGTT CTGTATTGCT TGAATACAAA CACAACTTTC
     5221 ATCAAATGCT GAATTACTGA CGTATCACAT CCTCGCTGTG GTTCTAACCA TCAGTTCCCA
     5281 CCTCCATTCC ACCATGTTTT AATGATGGTA GCTTTACAGT GTGTTTTGGT ACCTGCTAGA
     5341 GAACAATCCG CCGGTGTTAT TCTCAATCAA AATATCTGTG TCTATTCTCC ACCACTGAGA
     5401 TGAGATGGTT GGATGGCATC ACCGACTCAG TGGATGTGAG TTTGAGTAAG CTCTGGGAGT
     5461 TGGTGGTGGA CAGGGAAGCC AGGTGTGCTG CAGTTCGTGA GGTCACAAAG AGTCGGACAC
     5521 GACTGAGCGA CTGAACTGAA CTGAGCTCCA CGATTATTCT TACTGTTGGA CTTTGGACCT
     5581 GGCTCACTGA TTTCTTAAAA TATTTATTTA TTTGGCCGTG CCGGGTCTGA GCTGCAGCAT
     5641 TCTGGACCTT TAGTTGTGAC TTACAGACTC TTAGTTGCAG CACGTGGGTT CTAGCTTCCT
     5701 GACCAGGGGT CAAACCCAGG CCCCCTGCAT TGTGAGCTTG GAGCCTCAGC CACGGGACCG
     5761 CCAGGGAAGT CCAAAATTAT TCCTTTGATG TTGTGCTTGT AATTTTATGG AGCACCTGGG
     5821 TTCACTGGAG GGGAATTGAC GTCTTTGCTG CTGTGTCCGT TCATTAGGTT GTGCTATATT
     5881 TTATCCTCAC AGATCTTGTA CATTCCGTGT TAAGTTCATT CCTAGGGCTT TTAATAGAAC
     5941 TGTTATCGAG GTTGTAAGCG CTTCCGCCGT TTCGTATTCT CAATCATTAC TGCCTGTATA
     6001 GAAGAAAACC TGCTGAGTTT TGCCCAGCCT GCTTGTATTC CATCACAGGT TAACTCTTGT
     6061 ACCAGTTCTA ATAGTCCTTC AGTTCATCTT GAGCTTGTTT TGTTTTTTTT TTTAAAGTAA
     6121 ACTAGCCCAT CACCTGCAAA AACCAATTTT ATCTCATTTT TCCTAACACT CACACTCTTC
     6181 CCCCCATTTT GTGTCATGGG CTTGAATCTG TAGCATATAT TAAATAATAA ACGTAAGCGT
     6241 GGGAACCCTG GCCTCTAAAA TGGTTTTGCC TTTAAATGTG AAGCATGCTG TAAGTTTCAG
     6301 GAGATACTGT TTATTAAGTT GAAGATGTTT CTTTAGTTAA TTAACTTAGT AACAGGCTGG
     6361 ATATTTGCTT TCTTTAATCA GAAATAAGTA CTGACTTTAC ACTGCTGTCC TGTTAAATTT
     6421 TGCTTCAAAA ATCGTATGCG CATCCCTTAA ACACAATCAT GACCCAGAAG TTCCACTGCT
     6481 GAATTAAAAG CATGCTGGAC CCAGTGCAGC ACGGGTCACC TTCCTGCTTA GAGTCTCTAC
     6541 GTAGGGAGGC GAGGGCTCGA TAGGCGAGGA CAGAAACGGT ATGGGCCTAA CAGAAGCAGA
     6601 AGATATTAAG AAGAGGTGGC AAGAATACAC AGAAGAACTG TACAAAAAAG ATCTTCATGA
     6661 CCCAGATAAT CACGATGGTG TGATCACTCA TCTAGAGCCA GACATCCTGG AATGTGAAGT
     6721 CAAGTGGGCC TTAGAGAGCA TCACTACAAA CAAAGCTAGT GGAGGTGATG GAATTCCAGT
     6781 GGAGCGATTT CAAATCCTGA AAGATGATGC TGTGAAAGTG CTGCACTCAA TATGCCAGCA
     6841 AATTGGGAAA ACTCAACAGT GGCCACAGGC CTGGAACAGG TCAGTTTTCA TTCCAATCCC
     6901 AAAGAAAGGC AATGCCAAAG AATGCTCAAA CTGCCGCACA ATTGCACTCA TCTCACACGC
     6961 TAGCAAAGGA ATGCTCAAAA TTCTCCAAGC CAGGCTTCAG CAATACATGA ACCGTGAACT
     7021 TCCTGATGTT CAAGCTGGTT TTAGAAAAGG CAGAGGAACC AGAGATCAAA TTGCCAACAT
     7081 CTGCTGGATC ATGGAAAAAG CAAGAGAGTT TCAGAAAAAC ATCTATTTCT GCTTTATTGA
     7141 CTATGCCAAA GCCTTTGACT GTGTGGATCA CAATCAACTG TGGAAAATTC TGAAAGAGAT
     7201 GGGAATACCA GACCACCTGA CCTGCCTCTT GAGAAATCTG TATGCAGGTC AGGAAGCAAC
     7261 AGTTAGAACT GGACATGGAA CAACACACTG GTTCCAAATA GGAAAAGGAG TACGTCAAGG
     7321 CTGTATATTA TCACCCTGCT TATTTAACTT ATATGCAGAG TACATCATGA GAAACACTGG
     7381 ACTGGAAGAA ACACAAACTG GAATCAAGAT TGCCAGGAGA AATATCAATA ACCTCAGATA
     7441 TGCAGATGAC ACCACCCTTA TGGCAGAAAG TGAAGAGGAA CTAAAAAGCC TCTTGATGAA
     7501 AGTGAAAGTG GAGAGTGAAA AGTTGGCTTA AAGCTCAACA TTCAGAAAAC AAAGATCATG
     7561 GCATCTGGTC CCATCACTTC ATGGGAAATA GATGGGGAAA CAGTGGAAAC AGTGGCAGAC
     7621 TTTATTTTTT GGGGCTCCAA AATCACTGCA GATGTTGATT GCAGCCATGA AATTAAAAGA
     7681 CACTTACTTC TTGGAAGCAA AGTTATGAGC AACCTAGATA GCATATTAAA AAGCAGAGAC
     7741 ATTACTTTGC CAACAAAGGT CCATCTAGTC AAGGTTATGG TTTTTCCTGT GGTCATGTAT
     7801 GGATGTGAGA GTTGGACTGT GAAGAAGGCT GAGCGCCAAA GAATTGAGGC TTTTGAACTG
     7861 TGGTGTTGGA GAAGACTCTT GAGAGTCCCT TGGACTGCAA GGAGATCCAA CCAGTCCATT
     7921 CTGAAGGAGA TCAGCCCTGG GATTTCTTTG GAAGGAATGA TGCTGAAGCT GAAACTCCAG
     7981 TACTTTGGTC ACCTCACGCG AAGAGTTGAC TCATTGGAAA AAACTCTGAT GCTGGGAGGG
     8041 ATTGGGGGCA GGAGGAGAAG GGGACGAGAG AGGATGAGAT GGCTGGATGG CATCACTGAC
     8101 TCAATGGACG TGAGTCTGAG TGAACTCCGG GAGTTGGTGA TGGACAGGGA GGCCTGGCGT
     8161 GCTGCGATTC ATGGGGTCGC AAAGAGTCGG ACACGACTGA GTGACTGAAC TGAACTGAGG
     8221 ATTCTTGTCA TCATAAACTC TGACAGTGCA ATCTGGGTGC TTTTTTTGTT CTTCTGAGAT
     8281 TTTTAAGGGT ATGTTTGGTT ATGGTAGGAC ACAGAGGCTG ACTCAATGAG GGGCAGGCAT
     8341 TATGGGATGA GTCCAGGCCT CTGGCTTGTG GAGAAATCTA CCGAATTGAG AACAATGTGG
     8401 GGGACCAGGT CTGCAAGGAC CTGGGAGCAG TTTCGATGGA AGATGCTGAG TCTGAGGCGT
     8461 CTGTGGGACA CTCAAGCTGA GACGCCTCCA GGAGGCAGAA TGTGTATAAA TCCAGAGCCA
     8521 AAAAAAAGAG GTCAGGAAGG AAACAGGGAT GCAAGGGCCC TGGGTGGTCG TCCGAGTGCA
     8581 CAGTGTGGGT CAGAAGCAGA GAGAGTGGAA GAGGAGGCTG CGGGGGGACC TCAGACTAGA
     8641 CGGGATGGGA CCTTGTTAGA CTTGACCCCA GAAGTTTCAG GGAGAGATGG AGGTGGGAGG
     8701 GCGAGGGCTC CCCCCACCAA GTCCCAGCGT GTGACACAGG GCTTGGCAGA CGGGTGCTTG
     8761 ATGGCCACTG TTGGACAGAC AGATGCAAGA TGGACAGATG GATGGACAAT GGATGGAAGG
     8821 ATGGATGTTG GATGACAGAT GGATGGCTGG GTGATGGATG GATGGATGGA TGTTGGATCG
     8881 ATGGATGGAC AAACAGATGT ACAGAAAGAC AGTGATCTGA CAGCAGAGAA TGTTCATTGA
     8941 AGAGAACAAA CTGAACTGCA TCTCCGTGGG TGGAGAAAAA GGGCAGGGTT CCCCACTTGG
     9001 GGCCTGAGGA ATAGCCCGGT GTCCACAGCC CCAGGAAGGA AGCTGCCTGG CTGGACTGTG
     9061 AGGACTGTGG GGAAGGAACA CCCAGAGGCC TTACAGTGAG GCCAGGAGCG GCTGGGCAGG
     9121 TCCAAGCCAG GCCGGTACTC CTCTGCCGCC CCGCACAGAC GCGGCGCTCC ACGTCTCCCT
     9181 CAGCGCTAAG GCGTCAGTGG TGGCCAGGAC AGCCTCCGAG TGAGGGGGCA CTGGGTGACC
     9241 CCAAGGCGTG TGTGGCTGCT GCCTCGGCCA GGGGGCTGGG CACAGGGCAC CTCCAGGACA
     9301 CAAGGTCCCC TGGCCTCTGG AAGGCTGGCT CCACAACACC CCTCAGCGGA GGACACAGCC
     9361 CCACCGGCTG CAGCCCTGCG CCCGTCACGC CCAGCAGGTT CCCGCTCGGC CCAGCCCCCC
     9421 CGGGGGACAG GCCCCAGGCG CTGTCCCGGC GGGTTTTGGT CCGAGACTTA GTCTCTGTAT
     9481 TTTGTCTTAG GCGGCGGGAC CTGGGTCACC GTCCTGGGTA AGTGGCTCTC ACCCTACCCC
     9541 AGCCTCTCTC ACCCTCTGCT CTCTCGGGAA AGTCACTTCT CTTGCTCTGG GGGCAGCTTC
     9601 CTCTCTGTCC CCCCGGCCTT AAGGGCCGAT CCCCACCTTT CTCCGTGGGG CCGGGAGGGG
     9661 AGGCGGGTTG GTCTTGGGGT AACCAGCAGG AGCATCCAGT GGCCGACCGT CCAATGGGGC
     9721 CAGTCGGGGC GCCGGGGCTG GTGTTTGGTC CAGGAATGCA GGGACTTGTT CCCCTCTTGC
     9781 AGGGCAGACG CTGGGGTGCG GGCCAGAGGC TGGTGCTGAC TAGGGGCATC TCCAAGCCCC
     9841 GGGCTCTGTG CTGTGAGCTC CATGCCCCAG CCGGGAGGCC AGACAGGAGC TTGGGGGCTC
     9901 GGCGGGGGCT ATGACCAGGC CCCAGGAACA CAGAGGGCAG CCTGAGGGAA GGCCCTGGAG
     9961 GGCAGAGAGA GAGGGGTCTC GCCCGCTCTG GGCTGAGGGG CCGGGTGGAC ACAGCTGAGA
    10021 CGGGGCAAGC TGACCAGAGG ATCTCAGGAC AGCGGTCAGA AAGGAGCGGG TCCCATGGGG
    10081 CAGAAACTCG TCAGTCTGGG AGACCTGATC CCCTGGGACC CAGGGGTCAC ACCTGTCCGA
    10141 GGGTCGGCCT CCGCTGGCCT CGAAGCGAGC ATTGGACTTA GGAGATATGA ACAGGGCTCT
    10201 GACTCCCACA GAATCGGGGT CTTTGGAGGT GCTGTGTGGG GGCACCGTCC CCTGAAGGCA
    10261 GGTGAGGCGA GGGGCCCTGC GCTCAGGCAG GGCGGACGGT AGACAGGCAG GACCTCAGAG
    10321 GAGCCCCGGG CTTTGGCCAG GAGAGCTGAG GCTGGGCTGG GCGAGGAGAG GGAGGCCCGG
    10381 GCCCGGCTCC GCACATGACC CTAGCACGCT TGTCCCCACA TCTCCCATCA GGACCGTCCT
    10441 GGCAGGTGGG CGGGGGGACC CGGGTTCACG GAGGAGGCAC CTGGGCTGCA TGAGCGGAAG
    10501 GTCACGGAGG GGTCTGGCAG GGGCTGAGGG CTCAAGGGGT CAGTGCCAAG AGCAGACACA
    10561 GACTCCCGGG GCCAGGAGGA CGGAGGAGAG CAGCCCTGGT CGCAGCCGGG GACTCTGAGG
    10621 CCACGTTTGG CTGGTCACTT GGAGAGTGGA TTGCAATGGC TTCTGAGGGG CTGTCTGCCG
    10681 CCCAGGGGCT GAGGGCAAGG GTCGGAGGGC ACAGAGAAGG CAAACAGGGC TACCGTGGGG
    10741 ACAAGGTCAG AACCTCCCCG GCGTCTTACA CCCTCTCCTC TGTCCACACG GGTCAGCCCA
    10801 AGTCCGCACC CTCGGTCACC CTGTTCCCGC CCCCCACCGA GGAGCTCAGC GCCAACAAGG
    10861 CCACCCTGGT GTGTCTCATC AGTGACTTCT ACCCGGGTAG CGTGACCGTG GCCTGGAAGG
    10921 CAGACGGCAG CACCATCACC CGCAACGTGG AGACCACCCG GGCCTCCAAA CAGAGCAACA
    10981 GCAAGTACGC GGCCAGCAGC TACTGAGCCT GACGGGCAGC GACTGGAAAT CGAAAGGCAG
    11041 TTACAGCTGC GAGGTCACGC ACGAGGGGAG CACCGTGACG AAGACAGTGA AGACCTCAGC
    11101 GTGTTCTTAG GGCCCTGGAC CCCCACCCTC GGGGGCCCTC TGGCCCACAC CCCCTCCCCC
    11161 ACCTCTCCAT GGACCCCTGA GCCCCTGCCC AGGTCGCCTC ACACCAGGGG CCTCTCCTCC
    11221 CTCCCTGTTC CTGTTTCTCC TGAATAAAGA CCTTCTCATT TATCAGCCGA CATGTCTGAA
    11281 GTGCTTTCTG GGTCTGGCCG AGTGTCGGGG TTAAGGGTCA GTTCCTTAGG GAAGGGACAG
    11341 GTGTGACCTG AGAGTCCATC CACTTGTCAT CACCGCAACC CATCCCCAGG GACCAGGGAG
    11401 CTCTGAGAGC CAGGGGAGCG ATGATCCAGA GACGGACATT GTCAGCGGCA CAGGCTCGGG
    11461 GGATCAGGCT TGCCCTCCCA TACACCCCAT CCCCCCAGGA AGGGACAAGG GCCTTGAAAG
    11521 GGGCAGGGGA TACCTCTGGG GTTGGGGGCT GAGGACTGGG GAGAAATGAG GAGGGTTCCA
    11581 GGTGAGACTG AGACTCACAC GGCAGGCTTG GGGCCTAGTG GGGAGCGGGG CCTCCCGCAG
    11641 GAGGACTGTA GGCATCTGAA GCCAGGCCAG GGGTGGACTT AGCTCTGCAG GGACCAGGTG
    11701 CCATCTTCCT GTATGGTGGG GGGCTGGGAG GTGGTCAGGA GAGCCAGGTC AGTGGAAAAG
    11761 GACACCATCG GGGATAAAGA GGCCATCCAG TGACTGCCGC ATGGAGAGAG TCCATTGGAC
    11821 TTCAGGAGGA GAGTTAGACT GATGAACCCA GCTCTTGCCA GGCTTAGAGT GTGGCCAGAG
    11881 TGCTCCCAGA AGGTCGGAAT CTCGGAGGAG TCAGCACCCC CGATCCCTGC CCAGGGCGCC
    11941 TCCCCCATAA CGTAGTGGCT CACCTGAGCG AACCTGCAGC TGGACACACA AGCTCAGGGC
    12001 CCGGGGCGAG GGGCCATCTG CTCAGAGCTG CAGCCCCACT GGCTCTGTCG TCCTCAGGAC
    12061 CCTGGCCTCG CAGCCCGCCT GTGCCTCCAG CTTCAGCCTC CAGCAGTCCG CAGGGTCAGC
    12121 CCAGGGACGA AGTCCTCATG GACGGAGGAC TCTGCGGCCT CCCTGCTGCA GAGGAGTGAT
    12181 GTCCCCCCGC CCCAGGTCTT CATGCCTGGT ATCCCGACCC AAAATCACAG ACGAGGAGGT
    12241 GAGAGAAGCC ACGGTCGCGG TGTTCCATGG CTGCTGCCTG ATTCCATTTC CATGAGGGGA
    12301 AAACTAAGAC CCCAAGGGAG AAGGGGACCA CCCAGGTCGC CCTCATCTTG ATGGCCCTGC
    12361 TGGGCACAAT GCCACCGGGT CCCCCACCCA GAGTTGTGCC CGCCCAAATC TAACTCCCCT
    12421 GTATTGTCAT ATGTTTTCAT CATGAAGAAC CGAGGACATG ACATGAGAAG GCAGAGGAAT
    12481 AATATCCCCC GGTTCTTGTC ACCTGGATCG CAGGTCATCA GTTCAGGGAT GCTGCCAACT
    12541 CCTGCCCACA ACAGAATCCC TCCCCCCCAG TGGGGGCCTT GGCCGCCCAT CCCCCACCAC
    12601 GTCATCTCAT CTGGAAACAT GTCGCTCGTG GCCTGGAAAG AAAGAACCTA AGCTGTAACT
    12661 AAATTATCAT GAGCAAACCC AAACAGAAAT CGTCCATAAT TCCTGAAGCC CGGAAAACAG
    12721 CTGCTCATGA CGTGACTCAC AATTGTCATA GAATATTTAC TTGGTTGTGT TTTGTTCTCA
    12781 TTCACTTTTT TTTAATGTCT CTTTCTTTCC GGTAATTTTT CATGTTAATA GTGATCAGTT
    12841 TTTAAACTCT TCCTTTATTT TATCGTATTC ATTTTTGGTG TTGCTGGGTC TTCACTGCTT
    12901 CCCAAGTTTT TCTCTGGTTG CAGCGAGCAT GGCCTGCTCT GTCCTTGCAG TGTGCAGGCT
    12961 GCTCGTTCCA GTGGCTCCCC CTGTTGCAGA GCACAGGCTC TGAGCCCAGG CTCAACCACT
    13021 GTGCTGTGAG GACTGAGGCG CCCCGAGGCC CGTGGGACCA TCTCAGATCA GGAAAGATCA
    13081 AACCCACATC TCCTGCACCG GCAGGCGGAT TCTTAACCAC TGGACCACTG AGAAAACCCA
    13141 GTGTTCACTC ATTTTTATTG AGCTACGGTT GACTTACAGA GTTGGATTAG TTTCTGCTGC
    13201 ACAACAAAGT GAATCAGATA TGTGTATATA TACACGCACG TGCACCCCCA CTTTGTAGAT
    13261 TCCTTTTCCA TCCAGGTCAT CACAGAGGAC TGACTCGCCT CCTCTGTGCT GTATGGTAGC
    13321 TTCTCATGAG TCGTCTGCTT TATACACAGA CCTTACAAGA GCAGCGTGTG TATGTCAATC
    13381 TCGATCTTCC AGTTTATCTC TCCCTTTCCG TGCCCCTTGG CAAACAGAAT TTTGTTTCCT
    13441 ACATCTGTGA CTTCATTTCT GTTTTGTAAA TCAGTCCCTC TGACCATCTT CTTAGATTCC
    13501 ACATTTAGCC GTATTGAGAG CTGCTTGTCC TTCGCTATCT GACTTCACTC AGGATGACAA
    13561 GCTCCAGGTC CATCCGTGTC TCTGCACATG GCATTGCTTC ATGCTTCTTC ACGGGTGATC
    13621 ATATTCCCTA GCATGTATGT ACCACATCTT CTGTATCCAG TCATCTGTCG GACATTTAAG
    13681 CTGTTTCCAC GCCCCAGCTA TTGTAAACAG TGCTGCAATG AATGCTGGAG TTCACGTGTC
    13741 TCTTTGAATG GTGGTTTTCT CGGGGTGTAT GCCCAGTGCT GGGATTGCTG GATCACATAC
    13801 GGTACGTTAA GCAGCCTTCA TGCTCTTCTC CCTAGGACCT GCGCCAGCTG TCGTTCCTGC
    13861 AAGCAATACA AGAGTGCTCC ATTTTCGTCA CAGCCTCTCC AGCATCACTC TTCCTAGACA
    13921 TGTGGATGAT GGCCATTCTG ACCATTTGGA GGTGTGCTCA CTGTAGCTTT GATCTGCATT
    13981 TCTCTAATAC TTAGGGATGT TGAGCATCTT TCCATGTGCC TCTTGGTTAC TTGTGTTTTG
    14041 GGCGCTGTTT GACTTGGTGT ATTTTGTGTT CTTTCCAAGA GGCTTGGAAA GCCTTGAGCC
    14101 TTTGATTGGT GGGTGTGTCT AGGGCCTGGT GGGTCCTCAG TCTCTCCCAA ATGGCTCTGG
    14161 CTTTTCCTAG CTAGAAGAGG CTGCAAGAGT GCGCCTGCTG CTGCTGGACT CCCCCAGGGT
    14221 AGGGGTGCAG CCCCCGGCCC CTCCACCTCA AGCTGTATCT GGGAAGTGCT CACTGCTCTA
    14281 CGTGCCTGCA AAGTAGTTCT AGCTAGAAAG GGCTGGCAGG GTTCTGGGGG ATATTTTGGC
    14341 CAGAGGCAAT CCTAGGACAG TTGGCCATTT CCCTCCACAG TGCCCTTTCG GGATCATAGG
    14401 TCACTTAGCC AAGTTATCTT CCGTGGAAGC TCCAATCCCA GGTCCCTCAG GTGGGATGGG
    14461 AAGCCAGGGG CAATTGTAGT TCCGTCCTCC TTGCTCTAGT GAAGCAGTAA GTGAAAGAAA
    14521 GCGAAGTCAC TCAGTCCTGT CTGACTCTTT GCGACTCCAT GGAGTGGAGC CTCCCAGGCT
    14581 CCCCTACCCA TGGGATTTTC CGGGCAAAGC TACGGGAGTG GGTCGCCATT TCCTTCTCCA
    14641 GAAGTGAAAG CAGTAATTGC TCCACAAAGG GAGGCCCGTC ACACGCTCTT CACGTCTCCA
    14701 GGAGTGGTTT CGGGTCTTAT TTCTGCCCTT TAGTGGAGCA CTTTTACAAA ATAATGAGTG
    14761 GTCTCTGCCA CCTTCTGAAG GAGAACAGTC CGTCGTGTCA TGGGGAAGTC TAGGGTACAT
    14821 GCAGGTGATG TTTGAATCGC CCTGGTTATA CCCTCTTGGT GCTGGAGTTC CCACCTTTGT
    14881 CCAGGGCAGC CTCTGCTCAT GGCCCCAGGT CTTACCGCTC AGGCACAGGA GACCTCACAA
    14941 CTTATTGCAT TCTGTGGGGA CCGTGTGTTC CAGGCTGATC TGGTGCCTGG CCCGACTCAG
    15001 GCCTGGGACG GCCCATGTAG CCCAGCAGCC TGATTCTCTT TAAAGCGATG CTGTCTGTCT
    15061 CAGGACCACA GTGAGGGGCT TGCTCACATC TCTGTTCTGA ATGCATCCAA ACGTCAGATG
    15121 AGACCCTGAG GCCTGGACAC TGTGCAGTCC TCCCTGCAGA CGGAGGCCGG ACTTGGGGCA
    15181 ACCAGCCCAA GCCCCGCTAG AGATGCCCGT TTGAGGCCGG GAGAACCCTG AGGCACTGGG
    15241 GCTGAGCCCC TGGAGCCCCA GTTAGGGTCA GATGCAAGAC GGTCACGGCA AATCCATTTC
    15301 ACGCGGGTCC GTGGGGGGAT GGGGACGCCC CTGCCCTCAG CCTGTGCTCT CACCACGAAG
    15361 TCAGGCTGCT GCCAACTCCA CAGACAAAAG AAGTGGCTTC CTCTCCGGGG CACTTCGCTC
    15421 TTCGGGCGGT GAAGGCCCCC TCCCCCACCT ATTATTCCAT TCCCACCCCT TGCCGCCTGG
    15481 TGGGAAGACA GTATCCAACA CACAACCTGC TTAGGGAACC TACCTTCCAA GACTGCTGCT
    15541 TAGCACGGGT GCCCTGTCCT GTCATCTGCT AAAGGAGAGG GTGCTGAAGC CCCTCTGTGA
    15601 GCAGATGGCA GCCTGGGGCA GTGACCCACG TCCTCCAGCG CAGCTGCAGG TGGGGCTGGG
    15661 GCGGGCCTCC CAGGGAGGGG TTTTTGTGCC AGCCTGTGTC ACTGTGTGAT CTTTTCGGCG
    15721 GCGGGACCAG AGTGACCGTC CTGGGTGAGT CTCCCTCCTC CCTTCTCTCC CTCTTCTTTC
    15781 CCCCAGGTTT AGACACTTTT CTGTCACTTT GCTCTTTTCT GTGCCCAGTG TCAGCCTGTG
    15841 GTCAAGCCTT CACCCGGGAC CCACCTCTGG GGCCCTGACC TCTTCCCTTT CCCTGATCCC
    15901 AGGCTTCTCC TACTTGGCAC TGAGGTCCCA CCAGAGCCTC CCCTCTGACC CCAGAGGCAG
    15961 GGGAATGAGC AGGCTGACCT AAGGACTTGT CTGTCTGGCT CCCGATCCTC GCTCTCCTCT
    16021 GTGCCCCCAA CCCCCAATCT GGGCTCTATG CTGACCCAGC TTTGTCTCTG AGGGTCACTT
    16081 GGGTTCCCCA TCTCATGGGG AAGAGGGAAC TGGACTGCAG ATGAGGAAAC ATGGGGAGAC
    16141 ATCAGAGGGA CACAGAACCC TCAGGGCTGG GGACCGAAGT CATAGGGCCA GGACACTCTG
    16201 GGACCTTGGG TCTAGGGATC CGGGTCAGGG ACTCGGCAGA GGTGGAGGGG CTCCCCCAGG
    16261 CCTCCATGGG GCTGCCGTGA AGATCCTGGG CCGGCCAGGG ACCCAGGGAA AGTGCAAGGG
    16321 GAAGACGGGG GAGGAGAAGG TGCTGAACTC AGAACTGGGG AAAGAGATAG GAGGTCAGGA
    16381 TGCAGGGGAC ACGGACTCCT GAGTCTGCAG GACACACTCC TCAGAAGCAG GAGTCCCTGA
    16441 AGAAGCAGAG AGACAGGTAC CAGGGCAGGA AACCTCCAGA CCCAAGAAGA ATCAGAGAGG
    16501 AACCTGAGCT CAGATCTGCG GATGGGGGGA CCGAGGACAG GCAGACAGGC TCCCCCTCGA
    16561 CCAGCACAGA GGCTCCAAGG GACACAGACT TGGAGACCAA CGGACGCCTT CGGGCAACGG
    16621 CTCGAACACA CATGTCAGCT CAAAATATAC CTGGACTGAC CCACAGGAGG CCAGGGAGGC
    16681 CACATCATCC ACTCAGGGGA CAGACAGACA GACTGCCAGC CCCAGGCAGA CCCCGGTCAA
    16741 CCATCAGACG GGCAGGCAAG GAGAGTGAGG GTCAGGTGTC TGTGTGGGAA ACCAAGAGCC
    16801 AGGGGGTCTC AGGACAGCGC TGGCAGGGGT CCAGGCTCAG GCTTTCCCAG GAAGATGGGG
    16861 AGGTGCCTGA GAAAACCCCA CCCACCTTCC CTGGCACAGG CCCTCTGGCT CACAGTGGTG
    16921 CCTGGACTCG GGGTCCTGCT GGGCTCTCAA AGGATCCTGT GTCCCCCTGT GACACAGACT
    16981 CAGGGGCTCT CATGACGGGC ACCAGACCTC TGATTGAGTG ATATTCTTCC CCTCGCCCAC
    17041 TTTGCAGGTC AGCCCAAGTC CCCACCCTCG GTCACCCTGT TCCCGCCCTC CAAGGAGGAG
    17101 CTCAGCGCCA ACAAGGCCAC CCTGGTGTGT CTCATCAGCG ACTTCTACCC GGGTAGCGTG
    17161 ACCGTGGCCT GGAAGGCAGA CGGCAGCACC ATCACCCGCA ACGTGAAGAC CACCCGGGCC
    17221 TCCAAACAGA GCAACAGCAA GTACGCGGCC AGCAGCTACC TGAGCCTGAC AGACAGCGAC
    17281 TGGAAATCGA AAGGCAGTTA CAGCTGCGAG GTCACGCACG AGGGGAGCAC CGTGACGAAG
    17341 ACAGTGAAGA CCTCAGCGTG TTCTTAGGGC CCTGGACCCC CACCCTCGGG GGCCCTCTGG
    17401 CCCACACCCC CTCCCCCACC TCTCCATGGA CCCCTGAGCC CCTGCCCAGG TCGCCTCACA
    17461 CCAGGGGCCT CTCCTCCCTC CCTGTTCCTG TTTCTCCTGA ATAAAGACCT TCTCATTTAT
    17521 CAGCCGACAT GTCTGAAGTG CTTTCTGGGT CTGGCCGAGT GTCGGGGTTA AGGGTCAGTT
    17581 CCTTAGGGAA GGGACAGGTG TGACCTGAGA GTCCATCCAC TTGTCATCAC CGCAACCCAT
    17641 CCCCAGGGAC CAGGGAGCTC TGAGAGCCAG GGGAGCGGTG ACCCAGAGAC GGACATTGCC
    17701 AGCGGCACAG GCTCGGGGGG GCAGGCTTGC CCTCCCAAGC ACCCCATCCC CCCAGGAAGG
    17761 GACAAGGGCC TTGAAAGGCG CAGGGGATGC CTCTGGGGTT GGGGGCTGAG ATTGGGAAAA
    17821 AATGAGGAGG GTTCCAGGTG AAACTGAGCC TCACACGGCA GGCTTGGGGC CTAGTGGGGA
    17881 GCGGGACCTT CCCGCAGGAA TAATAATCCC CCAGGTTCTT GTTGCCTGGA TCGCAGGTCA
    17941 TCAATTCAGG AGGACTGTAG ACATCTGAAG CCAGGCCAGG GGTGAACTTA GCTCTGGGGG
    18001 GCATCTGCAG GAAACGGGTG CCATCTTCCT GTATGGTGGA GGCGGGGGGA GGTGGTCAGG
    18061 GGAGCCGGGT CAGCAGAAAA GGACACCATC GGGGATAAAG AGGCCATCCA GTGACTGCCG
    18121 CATAAATAGA GTCCATTGGA ATTCAGGAGG AGAGTCAGAC CGACGAACCC AGCTCTTGCC
    18181 AGGCTTAGAG TGTGGGCAGA GTACTCCCAG AAGGTCGGGC TCTCGGACGA GTCAGCACCC
    18241 CCGATCCCTG CCCAGGGTGC CTCCCCCATC GCCTACTGGC TCACCTGAGC ACACCTGCAG
    18301 CTGGACACAC GGGCTCAGGG CCCGGGGCGA GGGGCCATCT GCTCAGAGCT GCAGCCCCAC
    18361 TGGCTCTGTC GTCCTCAGGA CCCCGGCCTC GCAGCCCGCC TGTGCCTCCA GCTTTAGCCT
    18421 CCAGCAGACA GCCGCGTCAG CCCAGGGACA AAGTCCACAT GGACAGAGGA CTCTGCGGCC
    18481 TCCCTGCGGC AGAGGAGTCC TCCACCCAGG TCATCATCCC TGGTACCCTG ACCCAGAATC
    18541 ACAGACGAGG AGGTGAGAGA AGCCAGGGTG GCGGTGTTCC ATGGCTGCTG CCTGATCCCA
    18601 TTTCCATGAT GAAAACTAAG ACCCCAAGGG AGAAGGGGAC CACCCAGGTC GCCCTCATCT
    18661 TGATGGCCCT GCTGGGCACA ATGCCACCGG GTCCCCCACC CAGAGTTGTG CCCGCCCAAA
    18721 TCTAACTCCC CTGTATTGTC ATACGTTTTC ATCATGAAGA ACCGAGGACA TGACATGAGA
    18781 AGGCAGAGGA ATAATATCCC CCGGTTCTTG TCGCCTGGAT CCTAGGTCAT CAATTCAGGG
    18841 ATGCTGCCAA CTCCTGCCCA CAACAGAATC CCTCCTCCCC AGTGGAGGCC TCGCCACCCA
    18901 TCCCCCACCA CGTCATCTCA CCTGAAAACA TGTCGCTCGT GGCCTGGAAA GAAAGAACCT
    18961 AAGCTGTAAC TAAATTATCA TGAGCAAACC CAAACAGAAA TCGTCCACAA TTCCTGAAGA
    19021 CCGGAAAACA GCTGCTCATG ACGTGACTCA CAATTGTCAT AGAATATGTA GTTGGTTGTG
    19081 TTTTGTTTTC ATTCACTTTT TTTTAATGTC TCTTTCTTTC CGGTAATTTT TCATGTTAAT
    19141 AGTGATCAGT TTTTAAACTC TTCCTTTATT TTATCGTATT CATTTTTGTG TTGCTGGGTC
    19201 TTCACTGCTT CCCAAGTTTT TCTCTGGTTG CAGCGAGCAC GGCCTGCTCT GTCCTTGCAG
    19261 TGTGCAGGCT GCTCGTTCCA GTGGCTCCTC CTGTTGCAGA GCTCAGGCTC TGGAGCCCAG
    19321 GCTCATCAGC TGTGCTGTGA GGACTTAGGC ACCCCGAGAC CTGTGGGACC TTCTCAGACC
    19381 AGGGAAGATC AAACCCACGT CTCCTGCACC GGCAGGCGGA TTCTTAACCA CTGGACCACT
    19441 GAGAAAACCC AGTGTTCACT CATGTTTATT GAGCTACGGT TGACTTACAG AGTTGGATTA
    19501 GTTTCTGCTG CACAACAAAG TGAATCAGAT ATGTATATAT ATACACGCAC GTGCACCCCC
    19561 ACTTTGTAGA TTTCTTTTCC ATCCAGGTCA TCACAGAGGA CTGACTCGCC TCCTCTGTGC
    19621 TGTATGGTAG CTTCTCATGA GTCGTCTGCT TTATACACAG ACCTTACAAG AGCAGCGTGT
    19681 GTATGTCAAT CTCGATCTTC CAGTTTATCC TCCCCTTCCG GCCCCCTTGG CAACCAGAAT
    19741 TTTGTTTCCT ACATCTGTGA CTTCACTTCT GTTTTGTAAA TCAGTCCCTC TGACCATCTT
    19801 CTTAGATTCC ACATTTAGCC GTATTGAGAG CTGCTTGTCC TTCACTGTCT GACTTCACTC
    19861 AGGATGACAA GCTCCAGGTC CATCCGTGTC TCTGCACATG GCATTGCTTC ATGCTTCTTT
    19921 ACAGGTGATC ATATTCCCTT GCATGTATGT ACCACATCTT CTGTATCCAG TCATCTGTCG
    19981 GACATTTAAG CTGTTTCCAC GCCCCAGCTA TTGTAAACAG TGCTGCAATG AACGCTGGAG
    20041 TTCACGTGTC TCTTTGAATG GTGGTTTTCT CGGGGTGGGA TTGCTGGATC ACATCCGGTA
    20101 CGTTAAGCAG CCTTGATGCT CTTCTCCCTG GGGCCTGCAC CAGCTGACGT TCCTGCAAGC
    20161 AATACAAGAG TGCTCCCTTT TCGTCACAGC CTCTCCAGCA TCACTCTTCC TAGACATGTG
    20221 GATGATGGCC ATTCTGACCA TTTGGAGGTG TGCTCACTGT AGCTTTGATC TGCATTTCTC
    20281 TAATACTTAG GGATGTTGAG CATCTTTCCA TGTGCCTCTT GGTTACTTGT GTTTTGGGCG
    20341 CTGTTTGACT TGGTGTATTT TGTGTTGTTT CCAAGAGGCT TGGAAAGCCT TGAGCCTTTG
    20401 ATTGGTGGGT GTGTCTAGGG CCTGGTGGGT CCTCAGTCTC TCCCAAATGG CTCTGGCTTT
    20461 TCCTAGCTAG AAGAGGCTGC AAGAGTGCGC CTGCTGCTGC TGGACTCCCC CAGGGTAGGG
    20521 GTGCAGCCCC CGGCCCCTCC ACCTCAAGCT GTATCTGGGA AGTGCTCACT GCTCTACGTG
    20581 CCTGCAAAGT GGTGCTAGCT AGAAAGGTCT GGCAGGGTTC TGGGGGATAT TTTGGCCAGA
    20641 GGCAATCCTA GGACAGTTGG CCATTTCCCT CCACAGTGCC CTTTCAGGAT CATAGGTCAT
    20701 TTAGCCAAGT TATCTTCTTT GGACACTCCA ATCCCAGGAC CCTCAGGTGG GATGGGAAGC
    20761 CAGGGGCAAT TGTAGTTCCG TCCTTCTTGC TCTAGTGAAG CAGTGAGTGA AAGAAAGGGA
    20821 AGTCACTCAG TCCCATCTGA CTCTTTGCGA CTCCATGGAC TGTAGCCTCC CAGGCTCCCC
    20881 TACCCATGGG ACTTTCCAGG CAAAGCTACA GGAGTGGGTC GCCATTTCCT TCTCCAGGAG
    20941 TGAAAGCAGT AATTGATCCA CAAAGGGAGG CCCGTCACAC GCTCTTCACG TCTCCAGGAG
    21001 TGGTTTCGGG TCTTATTTCT GCCCTTTAGT GGAGCACTTT TACAAAATAA TGAGTGGTCT
    21061 CTGCCACCTT CTGAAGGAGA ACAGTCCGTC GTGTCGCGGG GAAGTCTAGG GTACATGCAG
    21121 GCGATGTTTG AATCGCCCTG GTTATACCCT CTTGGTGCTG GAGTTCCCAC CTTTGTCCAG
    21181 GGCAGCCTCC GCTGGTGGCC CCAGGTCCTC CTGCTCAGGC ACAGGAGACT CACAACTTCC
    21241 TGCGTTCTGT GGGGACCGTG TGTTCCAGGC CCATCTGGTG CCTGGCCCGA CTCAGGCCTG
    21301 GGATGGCCCA TGTAGCCCAG CAGCCTGATT CTCTTTAAAG AGATGCTGTC TCGGGACCAC
    21361 AGCGAGGGGC TTGCTCACAT CTCTGTTCTG AATAAGATGC TCCTAGATGC ATCCAAACGT
    21421 CAGATGAGAC CCTGAGGCCT GGCCAGGACA CTGTCTAGTG CTCCCTGCAG ACGAAGGCCG
    21481 GGCTTGGAAG GCAACCAGCC CAAGCCCGCT AGAGATGCCC GTTTGAAGCC GGGAGAACCC
    21541 CGGGGAACTG GAGATGAGCC TCTGGAGCCC CAGTTAGGGT CAGATGCAAG ACGGTCACGG
    21601 CAAATCCATT CAACTCGTGT CTATGGGGGG ATTGGGACGC CCCTGCCCTC AGCCTGTGTT
    21661 CTCACCAGGG AGTCAGGCTG CTGCCAACTC CACAGACAAA AGAAGCGGCT TCCTCTCTGG
    21721 GGCACTTCGC TCTTCGGGCA GTGAAGGCTC CTGTCCCCCC CCTATTATTC CATTCCCAGC
    21781 CCTTGCCGCC TGGTGGGAAG ACAGTATCCA ACACGCAACT TGCTTAGGGA ACCTGCCTTC
    21841 CAAGGCTCCT GCTGCTTAGC ACGGGTGCCC TGTCCTGTCA TCTGCTAAAG GAGAGGGTGC
    21901 TGAAGCCCCT CTGTGAGCAG ATGGCAGCCT GGGGCAGTGA CCCACGTCCT CCAGCGCAGC
    21961 TGCAGGTGGG GCTGGGGCGG GCCTCCCAGG GAGGGGTTTT TGTGCCAGCC TGTGTCACTG
    22021 TGTGATCTTT TCGGCGGCGG GACCAGAGTG ACCGTCCTGG GTGAGTCTCC CTCCTCCCTT
    22081 CTCTCCCTCT TCTTTCCCCC AGGTTTAGAC ACTTTTCTGT CACTTTGCTC TTTTCTGTGC
    22141 CCAGTGTCAG CCTGTGGTCA AGCCTTCACC CGGGACCCAC CTCTGGGGCC CTGACCTCTT
    22201 CCCTTTCCCT GATCCCAGGC TTCTCCTACT TGGCACTGAG GTCCCACCAG AGCCTCCCCT
    22261 CTGACCCCAG AGGCAGGGGA ATGAGCAGGC TGACCTAAGG ACTTGTCTGT CTGGCTCCCG
    22321 ATCCTCGCTC TCCTCTGTGC CCCCAACCCC CAATCTGGGC TCTATGCTGA CCCAGCTTTG
    22381 TCTCTGAGGG TCACTTGGGT TCCCCATCTC ATGGGGAAGA GGGAACTGGA CTGCAGATGA
    22441 GGAAACATGG GGAGACATCA GAGGGACACA GAACCCTCAG GGCTGGGGAC CGAAGTCATA
    22501 GGGCCAGGAC ACTCTGGGAC CTTGGGTCTA GGGATCCGGG TCAGGGACTC GGCAGAGGTG
    22561 GAGGGGCTCC CCCAGGCCTC CATGGGGCTG CCGTGAAGAT CCTGGGCCGG CCAGGGACCC
    22621 AGGGAAAGTG CAAGGGGAAG ACGGGGGAGG AGAAGGTGCT GAACTCAGAA CTGGGGAAAG
    22681 AGATAGGCGG TCAGGATGCA GGGGACACGG ACTCCTGAGT CTGCAGGACA CACTCCTCAG
    22741 AAGCAGGAGT CCCTGAAGAA GCAGAGAGAC AGGTACCAGG GCAGGAAACC TCCAGACCCA
    22801 AGAAGAATCA GAGAGGAACC TGAGCTCAGA TCTGCGGATG GGGGGACCGA GGACAGGCAG
    22861 ACAGGCTCCC CCTCGACCAG CACAGAGGCT CCAAGGGACA CAGACTTGGA GACCAACGGA
    22921 CGCCTTCGGG CAAAGGCTCG AACACACATG TCAGCTCAAA ATATACCTGG ACTGACTCAC
    22981 AGGAGGCCAG GGAGGCCACA TCATCCACTC AGGGGACAGA CAGACAGACT GCCAGCCCCA
    23041 GGCAGACCCC GGTCAACCAT CAGATGGGCA GGCAAGGAGA GTGAAGGTCA GGTGTCTGTG
    23101 TGGGAAACCA AGAGCCAGGG GGTCTCAGGA CAGCGCTGGC AGGGGTCCAG GCTCAGGCTT
    23161 TCCCAGGAAG ATGGGGAGGT GCCTGAGAAA ACCCCACCCA CCTTCCCTGG CACAGGCCCT
    23221 CTGGCTCACA GTGGTGCCTG GACTCGGGGT CCTGCTGGGC TCTCAAAGGA TCCTGTGTCC
    23281 CCCTGTGACA CAGACTCAGG GGCTCTCATG ACGGGCACCA GACCTCTGAT TGAGTGATAT
    23341 TCTTCCCCTC GCCCACTTTG CAGGTCAGCC CAAGTCCCCA CCCTCGGTCA CCCTGTTCCC
    23401 GCCCTCCAAG GAGGAGCTCA GCGCCAACAA GGCCACCCTG GTGTGTCTCA TCAGCGACTT
    23461 CTACCCGGGT AGCGTGACCG TGGCCTGGAA GGCAGACGGC AGCACCATCA CCCGCAACGT
    23521 GAAGACCACC CGGGCCTCCA AACAGAGCAA CAGCAAGTAC GCGGCCAGCA GCTACCTGAG
    23581 CCTGACAGAC AGCGACTGGA AATCGAAAGG CAGTTACAGC TGCGAGGTCA CGCACGAGGG
    23641 GAGCACCGTG ACGAAGACAG TGAAGACCTC AGCGTGTTCT TAGGGCCCTG GACCCCCACC
    23701 CTCGGGGGCC CTCTGGCAAC GCCCCCTCCC CCAGCTCTCC ATGGACCCCT GAGCCCCCGC
    23761 CCAGGTCGCC TCACACCAGG GGCCTCTCTT CCCTCCCTGT TCCTGCTTCT CCTGAATAAA
    23821 GACCTTCTCA TTTATCAGCC GACATGTCTG AAGTCCTTTC TGGGTCTGGC CGAGTGTCGG
    23881 GGTTAAGGGT CAGTTCCTTA GGGAAGGGAC AGGTATGACC TGAGAGTCCA TCCACTTGTC
    23941 ATCACCGCAA CCCATCCCCA GGGACCAGGG AGCTCTGAGA GCCAGGGGAG CGGTGACCCA
    24001 GAGACGGACA TTGTCAGCGG CACAGGCTCG GGGGGGCAGG CTTGCCCTCC CACACACCCC
    24061 ATCCCCCCAG GAAGGGACAA GGGCCTTGAA AGGCACAGGG GATGCCTCTG GGGTTGGGGG
    24121 CTGAGATTGG GAAAAAATGA GGAGGGTTCC AGGTGAAACT GAGCCTCACA CGGCAGGCTT
    24181 GGGGCCTAGT GGGGAGCGGG GCCTTCCCGC AGGAATAATA ATCCCCCAGG TTCTTGTTGC
    24241 CTGGATCGCA GGTCATCAAT TCAGGAGGAC TGTAGACATC TGAAGCCAGG CCAGGGGTGA
    24301 ACTTAGCTCT GGGGGGCATC TGCAGGAAAC GGGTGCCATC TTCCTGTATG GTGGAGGCGG
    24361 GGGGAGGTGG TCAGGGGAGC CGGGTCAGCA GAAAAGGACA CCATCGGGGA TAAAGAGGCC
    24421 ATCCAGTGAC TGCCGCATAA ATAGAGTCCA TTGGAATTCA GGAGGAGAGT CAGACCGACG
    24481 AACCCAGCTC TTGCCAGGCT TAGAGTGTGG GCAGAGTGCT CCCAGAAGGT CGGGCTCTCG
    24541 GACGAGTCAG CACCCCCGAT CCCTGCCCAG GGTGCCTCCC CCATCGCCTA CTGGCTCACC
    24601 TGAGCACACC TGCAGCTGGA CACACGGGCT CAGGGCCCGG GGCGAGGGGC CATCTGCTCA
    24661 GAGCTGCAGC CCCACTGGCT CTGTCGTCCT CAGGACCCCG GCCTCGCAGC CCGCCTGTGC
    24721 CTCCAGCTTT AGCCTCCAGC AGACAGCCGC GTCAGCCCAG GGACAAAGTC CACATGGACA
    24781 GAGGACTCTG CGGCCTCCCT GCGGCAGAGG AGTCCTCCAC CCAGGTCATC ATCCCTGGTA
    24841 CCCTGACCCA GAATCACAGA CGAGGAGGTG AGAGAAGCCA GGGTGGCGGT GTTCCATGGC
    24901 TGCTGCCTGA TCCCATTTCC ATGATGAAAA CTAAGACCCC AAGGGAGAAG GGGACCACCC
    24961 AGGTCGCCCT CATTGGCCCT GCTGGGCACA ATGCCACCGG GTCCCCCACC CAGAGTTGTG
    25021 CCCGCCCAAA TCTAACTCCC CTGTATTGTC ATACGTTTTC ATCATGAAGA ACCGAGGACA
    25081 TGACATGAGA AGGCAGAGGA ATAATATCCC CCGGTTCTTG TCGCCTGGAT CCTAGGTCAT
    25141 CAATTCAGGG ATGCTGCCAA CTCCTGCCCA CAACAGAATC CCTCCTCCCC AGTGGAGGCC
    25201 TCGCCACCCA TCCCCCACCA CGTCATCTCA CCTGAAAACA TGTCGCTCGT GGCCTGGAAA
    25261 GAAAGAACCT AAGCTGTAAC TAAATTATCA TGAGCAAACC CAAACAGAAA TCGTCCACAA
    25321 TTCCTGAAGA CCGGAAAACA GCTGCTCATG ACGTGACTCA CAATTGTCAT AGAATATGTA
    25381 GTTGGTTGTG TTTTGTTTTC ATTCACTTTT TTTTAATGTC TCTTTCTTTC CGGTAATTTT
    25441 TCATGTTAAT AGTGATGANN NNNNNNNNCC CGCCCGCCTT AATGCATGCT GAGGTCCCCA
    25501 CCCGGAGTTG TGCCCGCCCA AATCTAACTC CCCTGTATTG TCATATGTTT TCATCATGAA
    25561 GAACCGAGGA CATGACATGA GAAGGCAGAG GAATAATATC CCCCGGTTCT TGTCACCTGG
    25621 ATCGCAGGTC ATCAGTTCAG GGATGCTGCC AACTCCTGCC CACAACAGAA TCCCTCCCCC
    25681 CCAGTGGGGG CCTTGGCCGC CCATCCCCCA CCACGTCATC TCATCTGGAA ACATGTCGCT
    25741 CGTGGCCTGG AAAGAAAGAA CCTAAGGCTG TAACTAAATT ATCATGAGCA AACCCAAACA
    25801 GAAATCGTCC ATAATTCCTG AAGCCCGGAA AACAGCTGCT CATGACGTGA CTCACAATTG
    25861 TCATAGAATA TTTACTTGGT TGTGTTTTGT TCTCATTCAC TTTTTTTTAA TGTCTCTTTC
    25921 TTTCCGGTAA TTTTTCATGT TAATAGTGAT CAGTTTTTAA AGTCTTCTTA TTTTATCGTA
    25981 TTCATTTTTG TGTTGCTGGC TCTTCACTGC TTCCCAAGTT TTTCTCTGGT TGCAGCGAGC
    26041 ACGGCCTGCT CTGTCCTTGC AGTGTGCAGG CTGCTCGTTC CAGTGGCTCC TCCTGTTGCA
    26101 GAGCTCAGGC TTTGGAGCCC AGGCTCATCA GCTGTGCTGT GAGGACTTAG GCACCCCGAG
    26161 ACCTGTGGGA CCTTCTCAGA CCAGGGAAGA TCAAACCCAC GTCTCCTGCA CCGGCAGGCG
    26221 GATTCTTAAC CACTGGACCA CTGAGAAAAC CCAGTGTTCA CTCATGTTTA TTGAGCTACG
    26281 GTTGACTTAC AGAGTTGGAT TAGTTTCTGC TGCACAACAA AGTGAATCAG ATATGTGTAT
    26341 ATATACACGC ACGTGCACCC CCACTTTGTA GATTTCTTTT CCATCCAGGT CATCACAGAG
    26401 GACTGACTCG CCTCCTCTGT GCTGTATGGT AGCTTCTCAT GAGTCGTCTG CTTTATACAC
    26461 AGACCTTACA AGAGCAGCGT GTGTATGTCA ATCTCGATCT TCCAGTTTAT CCTCCCCTTC
    26521 CGGCCCCCTT GGCAACCAGA ATTTTGTTTC CTACATCTGT GACTTCACTT CTGTTTTGTA
    26581 AATCAGTCCC TCTGACCATC TTCTTAGATT CCACATTGAA GCCGTATCGA GAGCTGCTTG
    26641 TCTTTCGCTG TCTGACTTCA CTCAGGATGA CAAGCTCCAG GTCCATCCGT GTCTCTGCAC
    26701 ATGGCATTGC TTCATGCTTC TTTACGGGTG ATCATATTCC CTTGCATGTA TGTACCACAT
    26761 CTTCTGTATC CAGTCATCTG TCGGACATTT AAGCTGTTTC CACGCCCCAG CTATTGTAAA
    26821 CAGTGCTGCA ATGAACGCTG GAGTTCACGT GTCTCTTTGA ATGGTGGTTT TCTCGGGGTG
    26881 GGATTGCTGG ATCACATCCG GTACGTTAAG CAGCCTTGAT GCTCTTCTCC CTGGGGCCTG
    26941 CACCAGCTGA CGTTCCTGCA AGCAATACAA GAGTGCTCCC TTTTCGTCAC AGCCTCTCCA
    27001 GCATCACTCT TCCTAGACAT GTGGATGATG GCCATTCTGA CCATTTGGAG GTGTGCTCAC
    27061 TGTAGCTTTG ATCTGCATTT CTCTAATACT TAGGGATGTT GAGCATCTTT CCATGTGCCT
    27121 CTTGGTTACT TGTGTTTTGG GCGCTGTTTG ACTTGGTGTA TTTTGTGTTC TTTCCAAGAG
    27181 GCTTGGAAAG CCTTGAGCCT TTGATTGGTG GGTGTGTCTA GGGCCTGGTG GGTCCTCAGT
    27241 CTCTCCCAAA TGGCTCTGGC TTTTTCTAGC TAGAAGAGGC TGCAAGAGTG CACCTGCTGC
    27301 TGCTGGACTC CCCCAGGGTA GGGGTGCAGC CCCCGGCCCC TCCACCTCAA GCTGTATCTG
    27361 GGAAGTGCTC ACTGCTCTAC GTGCCTGCAA AGTGGTGCTA GCTAGAAAGG TCTGGCAGGG
    27421 TTCTGGGGGA TATTTTGGCC AGAGGCAATC CTAGGACAGT TGGCCATTTC CCTCCACAGT
    27481 GCCCTTTCAG GATCATAGGT CATTTAGCCA AGTTATCTTC TTTGGACACT CCAATCCCAG
    27541 GACCCTCAGG TGGGATGGGA AGCCAGGGGC AATTGTAGTT CCGTCCTTCT TGCTCTAGTG
    27601 AAGCAGTAAG TGAAAGAAAG GGAAGTCACT CAGTCCCATC TGACTCTTTG CGACTCCATG
    27661 GAGTGGAGCC TCCCAGGCTC CCCTACCCAT GGGATTTTCC GGGCAAAGCT ACGGGAGTGG
    27721 GTCGCCATTT CCTTCTCCAG GAGTGAAAGC AGTAATTGAT CCACAAAGGG AGGCCCGTCA
    27781 CACGCTCTTC ACGTCTCCAG GAGTGGTTTC GGGTCTTATT TCTGCCCTTT AGTGGAGCAC
    27841 TTTTACAAAA TAATGAGTGG TCTCTGCCAT CTTCTCAAGG CGAACAGTCC GTCGTGTCGC
    27901 GGGGAAGTCT AGGGTACATG CAGGCGATGT TTGAATCGCC CTGGTTATAC CCTCTTGGTG
    27961 CTGGAGTTCC CACCTTTGTC CAGGGCAGCC TCCGCTGGTG GCCCCAGGTC CTCCTGCTCA
    28021 GGCACAGGAG ACTCACAACT TCCTGCGTTC TGTGGGGACC GTGTGTTCCA GGCCCATCTG
    28081 GTGCCTGGCC CGACTCAGGC CTGGGATGGC CCATGTAGCC CAGCAGCCTG ATTCTCTTTA
    28141 AAGAGATGCT GTCTCGGGAC CACAGCGAGG GGCTTGCTCA CATCTCTGTT CTGAATAAGA
    28201 TGCTCCTAGA TGCATCCAAA CGTCAGATGA GACCCTGAGG CCAGGACACT GTCCAGTGCT
    28261 CCCTGCAGAC GGAGGCCGGG CTTGGACGGC AACCAGCCCA AGCCCCGCTA GAGATGCCCG
    28321 TTTGAAGCCG GGAGAACCCC GGGGAACTGG AGATGAGCCT CTGGAGCCCT AGTTAGGGTC
    28381 AGATGGAAGA CGGTCACGGC AAATCCATTC AACTCGTGTC TATGGGGGGA TTGGGACGCC
    28441 CCTGCCCTCA GCCTGTGCTC TCACCAGGGA GTCAGGCTGC TGCCAACTCC ACAGACAAAA
    28501 GAAGCGGCTT CCTCTCCGGG GCACTTCGCT CTTCGGGCGG TGAAGGCCCC CTCCCCCCCT
    28561 ATTATTCCAT TCCCAGCCCT TGCCGCCTGG TGGGAAGACA GTATCCAACA CGCAACTTGC
    28621 TTAGCGAACC TGCCTTCCAA GGCTCCTGCT GCTTAGCACG GGTGCCCTGT CCTGTCATCT
    28681 GCTAAAGGGG AGGGTGCTGA AGCCCCTCTG TGAGCAGACG CCAGCCTGGG GCAGTGACCC
    28741 ACGTCCTCCA GCGCAGCTGC AGGTGGGGCT GGGGCGGGCC TCCCAGGGAG GGGTTTTTGT
    28801 GCCAGCCTGT GTCACTGTGT GCTGTTTTCG GCAGCGGGAC CACACTGACC GTCCTGGGTG
    28861 AGTCTCCCTC CTCCCTTCTC TCCCTCTTCT TTCCCCGAGG TATGGACACT TTTCTGTCAC
    28921 TCTGCTCTTT TTTGTGCCCA GTGTCAGCCT GTGGTCAAGC CTTCACCCAG AACTCTCCTC
    28981 TGGGGCCCTC CCCTCTTCCC GTCCCCTCAC CCCAGGCTTG TACTACTTGG CACTGAGGTC
    29041 CCACCAGAGC CTCCCCTCTG ACCCCAGAGG CAGGGGAATG AGCAGGCTGA CCTACAGACT
    29101 TGTCTGTCTG GCTCCGGGAC CTCGCTCTCT GCTGTCCCAT CAACCCCCAG TCTGGGTTCT
    29161 ATGCCACCCA GCTTTGTCTC TGACGGTCAC TTGAGCCCCC ATCTCATGGC AAAGAGGGAA
    29221 CTGGATTGCA GATGAGGGAC CGTGGGCAGA CATCAGAGGG ACACAGAACC CTCAAGGCTG
    29281 GGGACCAGAG TCAGAGGGCC AGGAAGGGCT GGGGACCTTG GGTCTAGGGA TCCGGGTCAG
    29341 GGACTCGGCA GAGGTGGAGG GGCTCCATCA GGCCTCCTTG GGGCTGCCGT GCAGATCCTG
    29401 GGCTGGCCAG GGACCCAGGG AAAGTGCAAG AGGGAAGACG GGGGAGGAGA AGGTGCTGAA
    29461 CACAGAACTG GGGAAAGAGA TAGGAGGTCA GGATGCAGGG GACACGGACT CCTGAGTCTG
    29521 CAGACAACAC TCCTCAGAAG CAGGAGTCCC TGAGGAAGCA GAGAGACAGG TACCAGGGTA
    29581 GGAAACCTCC AGGCCCAAGA AGAATCAGAG AGGAACCTGA GCTCAGATCT GCGGATGGGG
    29641 GGACCGAGGA CAGGCAGACA GGCTCCCCCT CGACCAGCAC AGAGGCTCCA AGGGACACAG
    29701 ACTTGGAGAC CAACGGACGC CTTCGGGCAA CGGCTCGAAC ACACATGTCA GCTCAAAATA
    29761 TACCTGGACT GACTCACAGG AGGCCAGGGA GGCCACATCA TCCACTCAGG GGACAGACTG
    29821 CCAGCCCCAG GCAGACCCCC GTCAACCATC AGACGGGCAG GCAAGGAGAG TGAGGGTCAG
    29881 ATGTCTGTGT GGGAAACCAA GAACCAGGGG GTCTCAGGAC AGCGCTGGCA GGGGTCCAGG
    29941 CTCAGGCTTT CTCAGGAAGA TGGGGAGGTG CCTGAGAAAA CCCCACCCAC CTTCCCTGGC
    30001 ACAGGCCCTC TGGCTCACAG TGATGCCTGG ACTCGGGGTC CTGCTGGGCT CTCAAAGGAT
    30061 CCTGTGTCCC CCTGTGACAC AGACTCAGGG GCTCCCATGA CGGGCACCAG ACCTCTGATT
    30121 GAGTGATCTT CTTCCCCTCG CCCACTTTGC AGGTCAGCCC AAGTCCCCAC CCTCGGTCAC
    30181 CCTGTTCCCG CCCTCCACGG AGGAGCTCAA CGGCAACAAG GCCACCCTGG TGTGTCTCAT
    30241 CAGCGACTTC TACCCGGGTA GCGTGACCGT GGTCTGGAAG GCAGACGGCA GCACCATCAC
    30301 CCGCAACGTG GAGACCACCC GGGCCTCCAA ACAGAGCAAC AGCAAGTACG CGGCCAGCAG
    30361 CTACCTGAGC CTGACGAGCA GCGACTGGAA ATCGAAAGGC AGTTACAGCT GCGAGGTCAC
    30421 GCACGAGGGG AGCACCGTGA CGAAGACAGT GAAGCCCTCA GAGTGTTCTT AGGGCCCTGG
    30481 ACCCCCACCC TCGGGGGCCC TCTGGCCCAC ACCCCCTCCC CCACCTCTCC ATGGACCCCT
    30541 GAGCCCCTAC CCAGGTCGCC TCACACCAGG GGCCTCTCCT CCCTCCCTGT TCCTGCTTCT
    30601 CCTGAATAAA GACCTTCTCA TTTATCAGCC GACATGTCTG AAGTGCTTTC TGGGTCTGGC
    30661 CGAGTGTTGG GATTAGGGGT CAGTTCCTTA GGGAAGGGAC AAGTGTGACC TGAGAGTCCA
    30721 TCCACTTGTC ATCACCGCAA CCCATCCCCA GGGACCAGGG AGCTCTGAGA GCCAGGGGAG
    30781 CGATGACCCA GAGCCGGACA TTGTCAGAGG CGCAGGCTCC TGGGGGGCAG ACTTACCGTC
    30841 CCACAAACCC TGTCCCCCCG GGAAGGGAAA AGGGCCCATG AAAGGGGCAG GGGATGCCTC
    30901 GGGGGTTGGG GGCTGAGATT GGGAAAAAAT GAGGAGGGTT CCAGGTGAGA CTGAGCCTCA
    30961 CACAGCAGGC TTGGGGCCCT AGTGGGGAGC GGGGCCTTCC CACAGCAGGA CTGTAGGCAT
    31021 CTGAAGCCAG GTTAGGGGTG GACTTAGTTC TGGGGGGCAT CTGCAGGGAC CAGGTGCCAT
    31081 CTTCCTGTAT GGTGGAGGCG GGGGGAGGCG GTCAGGAGAG CCAGGTCAGC AGAAAAGGAC
    31141 ACCATCAGGG ATAAAGAGGC CATCAGTGAC TGCCGCATGG AGAGAGTCCA TTGGACTTCA
    31201 GGAGGAGAGT CAGACCGATG AACCCAGCTC TTGCCAGGCT TAGAGTGTGG GCAGAGTGCT
    31261 CCTAGAAGGC CGGGCTCTCG GAGGAGTCGC ACCCCCGATC CCTGCCCAGG GCGCCTCCCC
    31321 CATAACCTAG TGGCTCACCT GAGCACACCT GCAGCTGGAC ACACGGGCTC AGGGCCCGGG
    31381 GCGAGGGGCC ATCTGCTCAG AGCTGCAGCC CCACTGGCTC TGTCGTCCTC AGGACCAGGC
    31441 CTCGCACCCG TCTGTGCCTC CAGCAGACAG CCGGGTCAGC CCAGGGACGA AGTCCACATG
    31501 GACAGAGGAC TCTGCGGCCT CCCTGCGGCA GAGGAGAGAC CCCCCCCCCC AGGTCGTCAT
    31561 CCCTGGTACC CCGACCCAAA ATCACAGACG AGGAGGTGAG AGAAGCCAGG GTCGCGGTGT
    31621 TCCATGGCTG CTGCCTGATC CCATTTCCAT GAGGGGAAAA CTAAGACCTC AAAGGAGAAG
    31681 GGGACCACCC AGGTCGCCCT CATCTTGATG GCCCTGCTGG ACACAATGCC ACCGGGTCCC
    31741 CCACCCAGAG TTGTGCCCGC CCAAATCTAA CTCCCCTGTA TTGTCATACG TTTTCATCAT
    31801 GAAGAACCGA GGACATGACA TGAGAAGGCG TAGGAATAAT AATATCCCCC GGTTCTTGTC
    31861 GCCTGGATCC CAGGTCATCA ATTCAGGATG CTGCCAACTC CTGCCCACAA CAGAATCCCT
    31921 CCTCCCCAGT GGGGGCCTCG GCCGCCCATC CCCCACCACG TCATCTCATC TGAAAACATG
    31981 TCGCTCGTGG CCTGGAAAAA AAGAACCTAA GCTGTAACTA AATTATCATG AGCAAACCCA
    32041 AACAGAAATC GTCCATAATT CCTGAAGCCC GGAAAACAGC TGCTCATGAC GTGACTCACA
    32101 ATTGTCATAG AATATTTACT TGGTTGTGTT TTGTTCTCAT TCACTTTTTT TTAATGTCTC
    32161 TTTCTTTCCG GTAATTTTTC ATGTTAATAG TGATCAGTTT TTAAAGTCTT CTTATTTTAT
    32221 CGTATTCATT TTTGTGTTGC TGGCTCTTCA CTGCTTCCCA AGTTTTTCTC TGGTTGCAGC
    32281 GAGCACGGCC TGCTCTGTCC TTGCAGTGTG CAGGCTGCTC GTTCCAGTGG CTCCTCCTGT
    32341 TGCAGAGCTC AGGCTTTGGA GCCCAGGCTC ATCAGCTGTG CTGTGAGGAC TTAGGCACCC
    32401 CGAGACCTGT GGGACCTTCT CAGACCAGGG AAGATCAAAC CCACGTCTCC TGCACCGGCA
    32461 GGCGGATTCT TAACCACTGG ACCACTGAGA AAATCCAGTG TTCACTCATT TTTATTGAGC
    32521 TACGGTTGAC TTACAGAGTT GGATTAGTTT CTGCTGCACA ACAAAGTGAA TCAGATATGT
    32581 ATATATATAT ACATGCACGT GCACCCCCAC TTTGTAGATT CCTTTTCCAT CCAGGTCATC
    32641 ACAGAGGACT GCCTCGCCTC CTCTGTGCTG TATGGTAGCT TCTCATGAGT CGTCCCCTTT
    32701 ATACACAGAC CTTACAAGAG CAGCGTGTGT ATGTCAATCT CGATCTTCCA GTTTATCTCT
    32761 CCCTTTCCGT CCCCCTTGGC AACCAGAATT TTGTTTCCTA CATCTGTGAC TTCATTTCTG
    32821 TTTTGTAAAT CAGTCCCTCT GACCATCTTC TTAGATTCCA CATTTAGCTG TATTGAGAGC
    32881 TGCTTGTCCT TCGCTGTCTG ACTTCACTCA GGATGACAAG CTCCAGGTCC ATCCGTGTCT
    32941 CTGCACATGG CATTGCTTCA TGCTTCTTTA CGGGTGATCA TATTCCCTTG CATGTATGTA
    33001 CCACATCTTC TGTATCCAGT CATCTGTCGC CGGACATTTA AGCTGTTTCC ACGCCCCAGC
    33061 TATTGTAAAC AGTGCTGCAA TGAACGCTGG AGTTCACGTG TCTCTTTGAA TGGTGGTTTT
    33121 CTCGGGGTGT ATGCCCAGTG CTGGGATTGC TGGATCACAT CCGGTACGTT AAGCAGCCTT
    33181 CATGCTCTTC TCCCTGGGGC CTGCACCAGT TGATATTCCT GCAAGCAATA CAAGAGTGCT
    33241 CCCTTTTCGT CACAGCCTCT CCAGCATCAC TCTTCGTAGA CATGTGGATG ATGGCCATTC
    33301 TGACCATTTG GAGGTGTGCT CACTGTAGCT TTGATCTGCA TTTCTCTAAT ACTTAGGGAT
    33361 GTTGAGCATC TTTCCATGTG CCTCTTGGTT ACTTGTGTTT TGGGCGCTGT TTGACTTGGT
    33421 GTATTTTGTG TTCTTTCCAA GAGGCTTGGA AAGCCTTGAG CCTTTGATTG GTGGGTGTGT
    33481 CTAGGGCCTG GTGGGTCCTC AGTCTCTCCC AAATGGCTCT GGCTTTTCCT AGCTAGAAGA
    33541 GGCTGCAAGA GTGCGCCTGC TGCTGCTGGA CTCCCCCAGG GTAGGGGTGC AGCCCCCGGC
    33601 CCCTCCACCT CAAGCTGTAT CTGGGAAGTG CTCACTGCTC TACGTGCCTG CAAAGTAGTT
    33661 CTAGCTAGAA AGGGCTGGCA GGGTTCTGGG GGATATTTTG GCCAGAGGCA ATCCTAGGAC
    33721 AGTTGGCCAT TTCCCTCCAC AGTGCCCTTT CGGGATCATA GGTCATTTAG CCAAGTTATC
    33781 TTCCGTGGAA GCTCCAATCC CAGGTCCCTC AGGTGGGATG GGAAGCCAGG GGCAATTGTA
    33841 GTTCCGTCCT CCTTGCTCTA GTGAAGCAGT AAGTGAAAGA AAGGGAAGTC GCTCAGTCCT
    33901 GTCTGACTCT TTGCGACTCC ATGGAGTGGA GCCTCCCAGG CTCCCCTACC CATGGGATTT
    33961 TCCGGGCAAA GCTACGGGAG TGGGTCGCCA TTTCCTTCTC CAGGAGTGAA AGCAGTAATT
    34021 GCTCCACAAA GGGAGGCCCT TCAGACGCTC TTCACGTCTC CAGGAGTGGT TTCGGGTCTT
    34081 ATTTCTGCCC TTTAGTGGAG CACTTTTACA AAATAATGAG TGGTCTCTGC CACCTTCTGA
    34141 AGGAGAACAG TCCGTCGTGT CGCAGGGAAG TCTAGGGTAC ATGCAGGTGA TGTTTGAATC
    34201 GCCCTGGTTA TACCCTCTTG GTGCTGGAGT TCCCACCTTT GTCCAGGGCA GCCTCTGCTC
    34261 ATGGCCCCAG GTCTTACCGC TCAGGCACAG GAGACCTCAC AACTTATTGC ATTCTGTGGG
    34321 GACTGTGTGT TCCAGGCCCA TCTGGTGCCT GGCCCGACTC AGGCCTGGGA TGGCCCATGT
    34381 AGCCCAGCAG CCTGATTCTC TTTAAAGCGA TGCTGTCTGT CTCAGGACCA CAGTGAGGGG
    34441 CTTGCTCACA TCTCTGTTCT GAATAAGATG CTCCCAGATG CACCCAAACA TCAGATGAAA
    34501 CCCTGAGGGC TGGCCAGGAC ACTGTCCAGT CCTCCCAGTA GACGGAGGCC GGACTTGGAT
    34561 TGCAACCAGC CCAAGCCTCA CTACAGGTGC CCATTTGAAG CCGGGAGAAC ACCAGGGAAC
    34621 TGGGGGTGAG CCCCTGGAGC CCCAGTTAGG GTCAGATGGA AGATGTTCAC GGCAAATCCA
    34681 TTCCAGCCCT GTCCGTGGGG GGATGGGGAC GCCCCTGCCC TCAGCCTGTA CTCTCACCAC
    34741 AGGGTCAGGC TGCTGCCAAC TCCACAGAGA AGAGAAGCGG CTTTCTCCTC CGGGGCACTT
    34801 CGCTCTTGGG TTTGTGAAGG CCCCCGCCCC CCCCACTATT CCATTCCCAC CCCTGGCTGC
    34861 CTGGTGGGAA GACGGGCATC CAACACGCAA ACCTGCTTAG GGAACCTGCC TTCCAAGGCT
    34921 CCTGCTGCTT AGCACGGGGT TCCCTGTCCT GTCATCTGCT GTGGGGGAGG CTGATGAAGC
    34981 CCCTATGTGA GCAGACGCCA GCCTGGGGTG GTGATCCACG TTCTCCAGCA CAGCTGCAGG
    35041 TGGGGGCTGC GGCGGGCCTC CCAGGAGGGG TTTTTGTGCC AGCCTATGTC ACTGTGTCCT
    35101 ATTTTCATTG GCAGGACCAG GCTGACTGTC CTGGGTGAGT CTCCCTCCTC CTTTCTCTCC
    35161 CTCTTCTTTC CCCCAGGTTT GGACACTTTT CTGTCACTTT GCTCTTTTCT GTGCTCAGTT
    35221 TCAACCTGTG GTCAACCCTT CAACCAGGAC CCACCTCTGG GGCCCTGACC TCTTCCCCTC
    35281 CCCTGACCCC AGACCTCTCC TACTTGTCTG AGGTCCCAAC AGAGCCTCCC CTCTGACCCC
    35341 AGAGGCAGGG GAATGAGCAG GCTGACCTAC GGACTTGTCT GTCTGGCTCC CAGACCTCAC
    35401 TCTCCTCTGT CCCCCCAACC CCCAGTCTGG GCTCTATGCT GACCCAACTT TGTCTCTGAG
    35461 GGTCACTTGG GGTCCCCATC TCATGGGGAA GCAGGAACTG GACTACAGAT GAGGGACCCT
    35521 AGGGAGACAT CAGAGGGACG CAGAACCGTC AGAGCTGGGG ACCAGAGTCA GAGGGCCAGG
    35581 ACAGGCTGGG GACCTTGGGT CTAGGGATCC GGGTCAGGGA CTCGGCAGAG GTGGAAGGGC
    35641 TCCCCAAGGC CTCCATGGGG CGGACCTGCA GATCCTGGGC CAGCCAGGGA CCCAGGGAAA
    35701 GTGCAAGGGG AAGACGGGGG AGGAGAAGGT GCTGAACTCA GAACCGGGGA AAGAGATAGG
    35761 AGGTCAGGAT GCAGGGGACA CGGACTCCTG AGTCTGAAGG ACACACTCCT CAGAGGCAGG
    35821 AGTCCCTGAA GAAGCAGAGA GACAGGTACT AGGGTAGGAA ATCTCCACCC AAGAAGACTC
    35881 AGAGAGGAAC CTGAGCTCAG ATCTGCGGAT GGGGGGACCG AGGACAGGCA GACAGGCTCC
    35941 CCCTCGACCA GCACAGAGGC TCCAAGGGAC ACAGACTTGG AGACCAACGG ACGCCTTCGG
    36001 GCAACGGCTC GAACACACAT GTCAGCTCAA AATATACCTG GACTGACCCA CAGGAGGCCA
    36061 GGGAGGCCAC ATCACCTACT CGGGACAGAC TGCCAGCCCC AGGCAGACCC CATCAACCGT
    36121 CAGACGGGAA GGCAAGGAGA GTGAGGGTCA GATGTCTGTG TGGGAAACCA AGAGCCAGGG
    36181 GGACTCAGGA CAGCGCTGGC AGGGGTCCAG GCTCAGGCTT TCCCAGGAAG ATGGGGAGGT
    36241 GCCTGAGAAA ACCCCACCCA CCTTCCCTGG CACAGGCCCT CTGGCTCACA GTGGTGCCTG
    36301 GACTCGGGGT CCTGCTGGGC TCTCAAAGGA TCCTGTGTCC CCCTGTGACA CAGACTCAGG
    36361 GGCTCCCATG ACGGGCACCA GACCTCTGAT TGTGGTCTTC TTCCCCTCGC CCACTTTGCA
    36421 GGTCAGCCCA AGTCCACACC CTCGGTCACC CTGTTCCCGC CCTCCAAGGA GGAGCTCAGC
    36481 ACCAACAAGG CCACCCTGGT GTGTCTCATC AGCGACTTCT ACCCGGGTAG CGTGACCGTG
    36541 GTCTAGAAGG CAGACGGCAG CACCATCACC CACAACGTGG AGACCACCCG GGCCTCCAAA
    36601 CAGAGCAACA GCAAGTACGC GGCCAGCAGC TACCTGAGCC TGATGGGCAG CGACTGGAAA
    36661 TCGAAAGGCA GTTACAGCTG CGAGGTCACG CACGAGGGGA GCACCGTGAC GAAGACAGTG
    36721 AAGCCTCAGA GTGTTCTTAG GGCCCTGGGC CCCCACCCCG GAAAGTTCTA CCCTCCCACC
    36781 CTGGTTCCCC CTAGCCCTTC CTCCTGCACA CAATCAGCTC TTAATAAAAT GTCCTCATTG
    36841 TCATTCAGAA ATGAATGCTC TCTGCTCATT TTTGTTGATA CATTTGGTGC CCTGAGCTCA
    36901 GTTATCTTCA AAGGAAACAA ATCCTCTTAG CCTTTGGGAA TCAGGAGAGA GGGTGGAAGC
    36961 TTGGGGGTTT GGGGAGGGAT GATTTCACTG TCATCCAGAA TCCCCCAGAG AACATTCTGG
    37021 AACAGGGGAT GGGGCCACTG CAGGAGTGGA AGTCTGTCCA CCCTCCCCAT CAGCCGCCAT
    37081 GCTTCCTCCT CTGTGTGGAC CGTGTCCAGC TCTGATGGTC ACGGCAACAC ACTCTGGTTG
    37141 CCACGGGCCC AGGGCAGTAT CTCGGCTCCC TCCACTGGGT GCTCAGCAAT CACATCTGGA
    37201 AGCTGCTCCT GCTCAAGCGG CCCTCTGTCC ACTTAGATGA TGACCCCCCT GAAGTCATGC
    37261 GTGTTTTGGC TGAAACCCCA CCCTGGTGAT TCCCAGTCGT CACAGCCAAG ACTCCCCCCG
    37321 ACTCGACCTT TCCAAGGCCA CTACCCTCTG CCCCTCCCCC AGGCCTCCCC CTCACAGTCT
    37381 TCAGGGGACC GGCAAGCCCC CAACCCTGGT CACTCATCTC ACAGTTCCCC CAGGTCGCCC
    37441 TCCTCCCACT TGCATGTCAG GAGGGTCCCA GCTGACTTCG AGGTCTCTGA CCAGCCCAGC
    37501 TCTGCTCTGC GACCCCTTAG AACTCAGCCC ACCACGGAGC CCAGCACCAT CTCAGGTCCA
    37561 AGTGCCCGTT TTGGTTGATG TGTTCCGTGA GCTCAAGCCC AGAATCAGGT TAGGGAGGTC
    37621 GTGGCGTGTT CATCTCTGAC CTTGGGTGCT TTCTTAGGAG CTCAGAATGG GAGCTGAGAC
    37681 ACGGATAGGC TGTGCTAGGC ACTCCCACGG GACCACACGT GAGCACCGTT AGACACACAC
    37741 ACACACACAC ACACACACAC ACACGAGTCA CTACAAACAC GGCCATGTTG GTTGGACGCA
    37801 TCTCTAGGAC CAGAGGCGCT TCCAGAATCC GCCATGGCCT CACTCTGCGG AGACCACAGC
    37861 TCCATCCCCT CCGGGCTGAA AACCGTCTCC TCACCCTCCC ACCGGGGTGA CCCCCAAAGC
    37921 TGCTCACGAG GAGCCCCCAC CTCCTCCAGG AGAAGTTCCC TGGGACCCGG TGTGACACCC
    37981 AGCCGTCCCT CCTGCCCCTC CCCCGCCTGG AGATGGCCGG CGCCCCATTT CCCAGGGGTG
    38041 AACTCACAGG ACGGGAGGGG TCGCTCCCCT CACCCGCCCG GAGGGTCAAC CAGCCCCTTT
    38101 GACCAGGAGG GGGGCGGACC TGGGGCTCCG AGTGCAGCTG CAGGCGGGCC CCCGGGGGTG
    38161 GCGGGGCTGG CGGCAGGGTT TATGCTGGAG GCTGTGTCAC TGTGCGTGTT TGCTCGGTGG
    38221 AGGGACCCAG CTGGCCATCC GGGGTGAGTC TCCCCTTTCC AGCTTTCCGG AGTCAGGAGT
    38281 GACAAATGGG TAGATTCTTG TGTTTTTCTT ACCCATCTGG GGCTGAGGTC TCCGTCACCC
    38341 TAGGCCTGTA ACCCTCCCCC TTTTAGCCTG TTCCCTCTGG GCTTCTTCAC GTTTCCTTGA
    38401 GGGACAGTTT CACTGTCACC CAGCAAAGCC CAGAGAATAT CCAGATGGGG CAGGCAATAT
    38461 GGGACGGCAA GCTAGTCCAC CCTCTTACCC TGGGCTCCCC GCGGCCTCCG GATAATGTCT
    38521 GAGCTGCCTC CCTGGATGCT TCACCTTCTG AGACTGTGAG GCAAGAAACC CCCTCCCCAA
    38581 AAGGGAGGAG ACCCGACCCC AGTGCAGATG AACGTGCTGT GTGGGGACCC TGGGAGTAAG
    38641 TGGGGTCTGG CGGGGACCGT GATCATTGCA GACTGATGCC CCAGGCAGGG TGAGAGGTCA
    38701 TGGCCGCCGA CACCAGCAGC TGCAGGGAGC ACAGGCCGGG GGCAAGTCAT GCAGACAGGA
    38761 CAGGACGTGT GACCCTGAAG AGTCAGAGTG ACACGCGGGG GGGGGGGCCC GGAGCTCCCG
    38821 AGATTAGGGC TTGGGTCCTA ACGGGATCCA GGAGGGTCCA CGGGCCCACC CCAGCCCTCT
    38881 CCCTGCACCC AATCAACTTG CAATAAAACG TCCTCATTGT CATTCAGAAA CCCTGCTCTC
    38941 TGCTCATGTT TTTCCTTGTC CCGTATTTAA TCGTCAACCT CTCCAGGATT CTGGAACTGG
    39001 GGTGGGGAAA CCCAGGCACC AAGGAGGAAA ATACCCCTAG GGGAGCAGCT TACAGTGTCG
    39061 GGGTGGGGGA GCGTCTCTGG GAGACTGGTT GGGACCCACC CCCACCCGCC CTCTCCTCCT
    39121 CCAGCTCAGG GCCTTGCCCA CCCCGCCACC TTCCTGGACT GGTGCCGTCC AGATGAGCCC
    39181 TCCCTCCCTG CCCTGCTCGA GACCCTCTAG ACGGCGACCC CGCCACCGCC ACCACTGTGT
    39241 CATCTCTTTC CTGCCCTGGC CCTGCCCCTG GAACGCCCCC CTCCCTCGCT GCCCAGTTCA
    39301 TCTCCTGCCC ACCCCCACGT CTTCCTTGTC ACCCCCGAGG CCTGGACCAC CCACGGGGGC
    39361 CAGGCCACTG CAGCACTGTC AGCGTCCTAG GCTCTTAAAT CTAGGGTGCG TCTCAGCTCT
    39421 CCACCCCACG ACAGGTTCAG GGGTGCAAGA GGCTGGAAGG AAGCCAGGAA GGAAAACGGT
    39481 TGCATGAAAG ACCCACCTGG AGGAGGCTTG AGCCCGCGAC AGAGATGAGC TCTGAGCTCC
    39541 TAAGGAAGGC GGCAAGAGGT GCCTCGGAAT CTCCGAGATT CGCAACAAAG CCTTCGCTGG
    39601 AGGGAAGCTA GTGTCTCTGT GCCGAAGCCA GGCACCTTGT ACCGCAGTTA AAAGTGAGGT
    39661 CATGTTTTAC TGGAGACCTC AGCCCTGCCG GGAGCCAGGC TCTGACACAC ACACACACAG
    39721 GTGATGGTCC GGCAGCCTCG GGACAGGGCG AAGACCATGA GCTGGCACGG CTGCCCCTGC
    39781 ACAGGGAGCC GACCATGTTC CTGTCTCGGG TTCCATCTGG GGCCGGGCGA CGGCTACATA
    39841 GTAACGGTCC CTGGGTTTGG CCCCTGGGAG GTGCACCAGG TAAGCTCCTG CCTCTGGACG
    39901 CAGGGTGGAC CCTTGGAACA AAAACCCACC ACCCTGCACA CACAGCACAC CTAAGGCCTC
    39961 TCCCACCCCT GCCTGAGATC CCTTGGGTGT CTCCGGGCCC CCAAGCTGTC CCCCAACTCA
    40021 CCACCCACCT CTGCCAGGTG GGAGCAAAGA GGAGAGGGCT GCTCTCCAAG GCCTGAGGCC
    40081 CAGGAAGGCG CCTGCCACCT CCCCGGGGCT TGTCCACTGG CCACTTGCTC CCTTCCACTA
    40141 TGACGTCAGG ACTCACTCCC TCTGTGAGGC CCCCAGGGTC TGGGGGATCC AGGGACTCTG
    40201 ACGACGAGGG GTGTGATGGG CCCCAAAGAA GCCTTCCATG CTGGGGCCCT GGGCGGTGCC
    40261 CCCCTCCCGC TGCACTTGGG GGCTAGAAAG GTAGGCTGCG GTCAGGGCTC GGGGTGTCCC
    40321 TTGGTGGCTC TGTCCCTTGG CTCTTGCATT AGCGGCTATA ATGAGTCACC CAAACACAGG
    40381 CTTTAAGCAA TCAATACACA TTTATTCTTA CAGGTCAGGG GGCAGAAGTA CAAAATGAGT
    40441 CCTACAGGAG AAGTTCAAGG CATCTCAGGC TGAGCTCCTT CCGGGGGTTT TTTCCAGCCT
    40501 CTGCTGTTTG TTGTTCAGTC GCTCAGTTGT GCCCGACTCT TTGCAAACCC ATGAACTGCA
    40561 GCAGGACAGG CCCCCCTGTC CTTCACCATC TCCTGGAGTT TGATCAAATT CATGTCCATT
    40621 GAGTCGGTGA TGCCGTCTAA CCATCTCATC CTCTGTCGTC CCCTTCTCCT CCTGCCCTCA
    40681 ATCTTTCCCA GCGTCAGGGT CTTTTCCAAT GAGTCAGTTC TTTGCATCAG GTGGCCAAAG
    40741 TATTGGAGCT TCAGCATCAG TCCTTCCAAT GAATATCCAG GCTTGATTTC CTTTAGGATT
    40801 GACTGGCTTG ATCTCCTTGC TGTCCAACGG ACTCTCAAGA GTCTTCTCCA ACACCACAAC
    40861 TTGAGAGCAT CAGTTCTTTG GCTCTCAGCC TTCTTTGTGG TCCAGCTCTC ACATCCCTAC
    40921 ATGACTACTG GAAAAACCAT GGCACTGACT ACACTCATCT TTATCAGCAA AGTGATGTCT
    40981 CTGCTTTTTA ATACACTGTC TAGGTTTGTT ACAGCTTTCC TTTCACAGAG CAAGCATCTT
    41041 TTAATTTCAT GGCTGCAGTC ACCGGCCACA GTGATTTTGG AGCCCGCCCT AAAAAAAAAA
    41101 AAATCTATCA CTGCTTCCAC TTTTTCCCCT TCTATTTGCC ATCAAGTGAT GGGACCGGAT
    41161 GCCATGATCT TAGATTTTTG AATGTTAAGC TTTAAGCCAG TTTTTTTTAC TCTCCTCATT
    41221 CACCCTCATG AAGAGGCTGT TTAGTTCCTC TTCACTTTCT GCCATTAAAG TGGTATCATC
    41281 TGCATATCTC AGATTATTGA TATTTTTTCC AATAATCTTA ATTCCAGCTT GTGATTCATT
    41341 CAACCCAGAA TGTCACATAA TGTATTCTGC ATATAAGTTA AATAAGCAGG GTGACAATAT
    41401 GCAGCCTTGA CGGACTCCTT TCCCAATTTG GAGCCAGTCC ATTGTTCCAT GTCCGGTTCT
    41461 AACCGTTGCT TCTTGACCCG CATACAGGTT TCTCAGAAGG CAGGTAAGAT GGCCCAGTAC
    41521 TCCCATCTCT TTAATAAGAA TTTTCTACAG TTTGTTGTCA CCCACACAGT CAAAGGCTTT
    41581 GGCATAGTCA GTGAAGCAGA AGTATTACAT TATGTCCTTT TGGAATTCCC TTGCTTTCTC
    41641 TATGACCCAA TGGATGTTGG CAATTTGATC TCTGGTTCCT CTGCTTTTTC TAAATCCTGC
    41701 TTGTACATCT GGAAGTTCTC GGTTCACATA CTGCTGAAGG CTAGCTTGAA GTAGTAGGAA
    41761 GCATTACTAT GAACAAAGCT AGTGGAGGTG ATGGAATTCC AGCTGAACTA TTCAAAATCC
    41821 TCACAGATGA TGCTTTTAAA GTGCTGTACT CGAGAAGTGA AAGTTGCTCA GTCGTGTCCG
    41881 ACTGAGCAAC CCCATGTCCG ACATAGCAAC CCCATGTCCG ACATAGCAAC CCCATGGAAT
    41941 TCTCTAGGCC AGAACACTGG AGTGGGTAGC CTTTCCCTTC TCCGGGGGAT CTGCCCAACC
    42001 CAGGGATTGA ACCCGGGTCT CCCGCATTGC AGGTGGCTTC TTTACTAGCT GAGCCACAGG
    42061 GAAGCCCATA CTGCTGCACT CAATATGTCA GCAAATTTGA AAAACTCAGC AGGGGCCACA
    42121 GGACTGGAAA TGGTCAGCTT TCATTGGATT GGTCAGTATC AGTGTCCAAT CCCAAAGAAG
    42181 GGCAACGCCA AAGACTATTC AAACTATCAT ACAATTGCTC CCGTGCTAGT AAGCTGTGCT
    42241 CAGAATCCTT CAAGCTGGGC TTCAGCAATC GTGAACCGAG AACCGAGACC TTCCAGCATC
    42301 CAGATGAGCC CAGTCCTCGG CTCAACCCTC CCCCTCTGCT TCAAAGCCGC AGCAGCTTCT
    42361 CACCTCTCTC CTTTCCCCTT TGACCTCTGC CCCCATCTCA CCCCTCAAGG AGGTGTTATA
    42421 GCCATGCGTT CCGGGAAACA AACTCACTCA GAAGGACAAT GCAGATAGTG GAGCGAAGTT
    42481 TATTACACCG GCGGGCCCAA GGCAGAGTCT CCTCTTAGCC GAGGACCCCG ACCAGCATTT
    42541 GTGAAAATCT TTAATACCTG TGTGTACGTG TCTGAACTCA CCACCCCAAT TTCCTTGAGA
    42601 CTTACATAAA CCAAGGAAGG GTAAATACAA TCGCAATAAC CCCATCATTC GAGTGTTAGG
    42661 TGTTCAAACA GTTAATAATC AATAAGACTG CACTCCGATA GACACAGAAA GAATTTATGA
    42721 CCTGTCTGGA GGTAGGGGTG ATTAGAGTAT GTTTTCTCTT AGGCGATGAG TAACCTGGAT
    42781 GTGATCTTCA AGATTCCCCT GTCCAGAGGG GGTCTTATCC TTCTACTGAG GTTTCCACAG
    42841 GCTCTAAACA CAGAGTTCAG AGTCCATTGG AGAGGTGGCA TGAGCAGCAC GAACAGGCCT
    42901 GAGATGGGCT CCAGGCCCTG TGAATCCCTT CTTCAGAGGC TCCAGGTCCA TCAGGGCTGT
    42961 CGTTGCCCAC TTCAGAGGTG TCAGCTACAA ACTGGCGCTT GCCGTGGGCA CTCGCCACCT
    43021 GCTTCTACAA GGATTAAAGC ACGCACTGCT GCAGCTGCCG ACCCTCAACA CCCGCCGAAA
    43081 GGAGTTCAGG GCGGAAAGCA GAAAGGAGGC CCTCTGTGCT GGGAGCAGGG GGTCTTCAGA
    43141 GAGTTAGACT GACTTTATGA GCCCAATTCT TGTATGTCCT CATATCTAGA AAAGTACCAA
    43201 ATCCTTCATG GTGATGATTG CTCCTCGTGC CTGGCAAAAG CTTCACAAGA CTGGTAGAAA
    43261 TCTGAAAAGA TACGTGCTCG GCTGCATGTC TTCCCCTTCA CCGAAATCAC ACATACACTC
    43321 GCCTTTCTCC CCCTGCCTCT TCGGGGCAGT TTCTCAGAGC TATCTGAGGG GCTATCTCCT
    43381 GGGCCACAGT CCTCATATTG TCCCAGATGA AACTTGCAAC TCTCACGCTG TGCTTTTTAT
    43441 TTTTAAGTTG ACAGAGGGCA GATTGACCAA GTCCAAACAC ACCAGGCTTG CCCTGCTCAG
    43501 CCAAGCGCTG GCGCAGCCTC TGCGGACTGA AAGCCCCAGA GCACTGGCTT GAGCGGTCCC
    43561 AGCTCATGGC CCCAGGGTCA GGTCAGAAGA GGGGGCTTGG CCTGGCCCTG CCCTGCCTCG
    43621 CTGAGCCACG CTGGGCAGCA CCCTTGGCCC GGGCTTGCTT GCTGAGGCCA AGGCAGGGAG
    43681 AGGCAATTGA GTTGGGTGGG GGAGGGGGGC TGTGACTTCC TTCACTGCCG GAAAGAGGCC
    43741 TAGAATAGCC TCGGGCTGTG GGGGGAGGTG GGAGGAGAAG TGACTGCTGG GCCCTGGGGG
    43801 AGGCCCAGGA GTTTCTACCG AGCTGAGCTG GGTGCCTCTC CCGACTGCCC AACCCCCTGA
    43861 GAGTCGACGG GAGAGCACAG CCTGGCCAAA CCTGGGCAGG GCACACGTGT CCTTCACCCC
    43921 ACAGTGGTCA CGAGCCCAGC GTGGTCCCTG CGTCTGGCGG GAAACACAGA CCCTCACACC
    43981 CCACACAAGG GTCCGGCCGC TTTCAAATAA CAGCAGCCGT GCCCTCTGGG CCGGTGACCC
    44041 GGACACAGAG AGATGAAGTC CGCATCTCTC AGAGTGCGCT GTCCTCCGCC CGGTCAGGCC
    44101 CGGGTCCCCT GCTTCTCTGA GGTCACCAGG AGGGATTGCA TGTGGGTCTC AGGGACACAG
    44161 GTTCAGTGAT GTGACAGAGG GTAGTGGGTC CCAGCAGGGC CGGTCTTTGG ACCCGTTTTT
    44221 CTGAAAAGCC AGTTGGCGAC CTGGGGTCAC AGCAAAGCTG ATCCTGTTTG GCCAGGAGTC
    44281 TCCCAGTGAC GGCCTCCCCC AGAACATCGG GCCCAGTGGG GGCTCCAGGG GGTAGACTTG
    44341 CCTCCCAGCT CACGCCCGTG TCTTGACAAG TCCATGATTT GGTAAAATTA ATTTGTGTTG
    44401 GATGGAGTTG ATTTAGTGGT GTGTGAGTTT CTGTGGCGCA GCAAAGTCAA TCAGTTACGC
    44461 ATACACATGT ATCCAGCTCT TCCTACGATT CTGTTCCCAT ATAGGTCATT ATGGGGTGTC
    44521 AGGTAGAGCT TCCTGTGCTA CGCAGTACGG CCTTATTCAG TTCAGCTCAG TCGTGTCCGA
    44581 CTCCTTGTGA CCCCATGGAC TGCAGCACGC CAGGCTCCCC TGTCCATCAC CAACTCCTGG
    44641 AGCTTATTCA AACTCATGTC CATCGAGCCG GTGATGCCAT CCAACCATCT CATCCTCTGT
    44701 CGTTCCCTCT CCTCCTGCCT TCAGTCTTTC CCAGCACCCC CTAGAGAAGG GAATGGCAAA
    44761 CCACTTCGGT ATTCTTGCCC TGAGAACCCC ATGAACAGTA CGGAAAGTCC TTATTAGTTT
    44821 TCTATTTTAT ATATAGCAGT GCACACGTGT CAGCCCCAAT CTCGCAATTT ATCACCCCCC
    44881 TCCGCCGCCG ATTGGTAGTC ATGTTTGTTT TCTACATCTG CGACTCTATT TCTGTTTTGT
    44941 AAACAAGTTC ATTTACACCA CTTTTTTAGA TTCTGCACAT ACGTGGCAAG CCCACAGCAA
    45001 ACATGCTCAA TGGTGAAAGA CTGAAAGCAT TTCCTCTAAG ATCAAAAACA AGACGAGGAT
    45061 GTCCACTCAC TCCGTTTTTA CTCAACACAG CCCTGAACGT CCTAGCCATG GCAATCAGAG
    45121 AAGAGAAAGA AATTAAGGAA TCCAAATTGG AAAAGAAGAA GTAAAACTCA CTCTTTGCAA
    45181 ATGACATGAC ACTTATACCC AGAAAATCCT AGAGATGCTA CCAGATAACT ATTAGAGCTC
    45241 ATCAGTGAAT TTGTTGCAGG ATACAAAATT AATACACAGA AATCTCCTGC ATTCCTATAG
    45301 ACTGACAACA AAAGATCTGA GAGAGAAATT AAGGAAACCA TCCCACGGCA TGAAAAAGAG
    45361 TAAAATACCT AGGAATAAAG CTACCTAAAG AGGCAAAAGA CCTGTACTCA GAAAACTATA
    45421 AAATACTGAC AAAGGAAATC AGACGACACA GAGAGAGAGA GATACCACGC TCTTGGATGA
    45481 GAAGAATCGA TAGTGTGACA ATGACTATAC TACCCAGAGA AACATACAGA TTCAGTACAA
    45541 CCCCTATCAA ATTCCCAATG GCATTTTTCA CAGAATCAGA ATTAGAACAA AAAGTTTTAC
    45601 AAGTTTCAGG GAAACAAGAA AGATCCTAAA GAGCCAGAGC AATCTTGAGA AAGAAAAATG
    45661 GAGCTGGAAG AGTCAGGCTC CCTGAGTTCT GACTGTGTAT ACAAAGCTGG CATGATTTTT
    45721 AACAGCAGGG GTGTAAATGA ACTTGTTCAC AAAACAGATG GTGGGGTGGG CTTCCCTGGT
    45781 GGCTCAGCTG GTAAAGAATC CTCCTGCAAC GCAGGAGACC TGGGTTCGAT CCCTAGGCTG
    45841 GGAAGATCCC CTGGAGAAGG GAAAGGCTAC CCACTCCAGT ATTCTGGCCT GGAAAATTCC
    45901 AAGGACCATA TAGTCCATGG GTTTGCAAAG AGTCGGACAC GACTGAGCGA CTTCCAATCC
    45961 TGGAAACGTC CCATTGTGGA CGGTGAACTG GGGTTGTCCA AGCTCAGGGT AACCGTTTGC
    46021 TGAGTGACTG ACACTCCTTC TCATGGGTTA AAATGTGGGG CCCAAGGCCA GGACCAGACC
    46081 CCGCAGTCAG CCAGGCAGAC CCTGTGCAGC CCCAGCGAGT GTGTGGCCGC CGTGGAGTTC
    46141 CTGGCCCCCA TGGGCCTCGA CTGGAGCCCC TGGAGTGAGC CCATTCCCTC CCAGCCCGTG
    46201 AGAGGCTGGG TGCAGCCCTA ACCATTTCCC ACCCAGTGAC AGATCCGCCT GTGTGGAAAC
    46261 CTGCTCTTGT CCCCAGGGAA CCTGGCAGGA CTCAGGGAGA ATGTCTCAGG GCGGCCACAG
    46321 ATCAGGGGCT GGGGGGGCAG GGCTGGGTCC AGCAGAGGCC CTGTGCCCAC TCCCCGGAAA
    46381 GAGCAGCTGA TGGTCAGCAT GACCCACCAG GGCACCGACG CGTGCTTGCA CACAGGCCGC
    46441 CCCCTCATGG TGACACTCTT TTCCTGTGGC CACATCTCGC CCCCTCAGGT CCCTCCTGCT
    46501 CCCCAGCTCC TGGCCTGGGA ACCTCTTCCC CGCCCCGGGG ACGTCAGGGC TGGTGTCCAC
    46561 TGAGCATCCC ATGCCCGGGA CTGTGCTGAT CACCAGCACC TGCACCCCCT CTCGGGTCTC
    46621 ACCAGGATGG GCAACTCCTG CCCATCCAGC ACCCAGCCTC CTGGGTACAC ATCGGGGGAG
    46681 GAGGGAGAAG CCTGGGCCAG ACCCCCAGTG GGCTCCCTAA GGAGGACAGA AAGGCTGCCG
    46741 TGGGCCAGCC GAGAGCAGCT CTCTGAGAGA CGTGGGACCC CAGACCACCT GTGAGCCACC
    46801 CGCAGTGTCT CTGCTCACAC GGGCCACCAG CCCAGCACTA GTGTGGACGA GGGTGAGTGG
    46861 GTGAGGCCCA GGTGCACCAG GGCAAGTGGG TGAGGCCCGA GTGGACAGGG TGAGTGGGTG
    46921 AGGCCCAGGT AGACCAGGGC CCATGTGGGT GAGGCCCGGG TGGACCAGAG TGAGCGGGTG
    46981 AGGCCCAGGT GGACAGGGCG AGCGGGTGAG GCCCAGGTGG ACAGGGCGAG CGGGTGAGGC
    47041 CCGGGTGGAC AGGGCGAGCG GGTGAGGCCC GGGTGGACAG GGCGAGCGGG TGAGGCCCGG
    47101 GTGGACAGGG CGAGTGGGTG AGGCCCGGGT GGACCAGGGC GAGTGGGTGA GGCCCGGGTG
    47161 GACAGGGCGA GTGGGTGAGG CCCGGGTGGA CCAGGGCGAG TGGGTGAGGC CCAGGTGGAC
    47221 AGGGTGAGTG GGTGAGGCCC AGGTAGACCA GGGCCCAGAG CAAAGCCCCG GCTCAGCAGT
    47281 GATTTCCTGA GCGCCCACTG CTTGCAGGGA CCTCAGCGAT GGTAAGGCAG CCCTGTTGGG
    47341 GGCTCCCGAC TGGGGACAGC ATGCAGAGAG CGAGTGGTCC CCTGGAGAAA CAGCCAGGGC
    47401 ATGGCCGGGC GCCCTGCCAG GCTGCCCCAG GGGCCACAGC TGAGCCCCGA GGCGGCCAGG
    47461 GGCCGGGACA GCCCTGATTC TGGGTTGGGG GCTGGGGGCC AGAGTGCCCT CTGTGCAGCT
    47521 GGGCCGGTGA CAGTGGCGCC TCGCTCCCTG GGGGCCCGGG AGGGACGGTC AGGTGGAAAA
    47581 TGGACGTTTG CGGGTCTCTG GGGTTGACAG TTGTCGCCAT TGGCACTGGG CTGTTGGGGC
    47641 CCAGCAGCCT CAGGCCAGCA CCCCCGGGGC TCCCCACGGG CCCCGCACCC TCACCCCACG
    47701 CAGCTGGCCT GGCGAAACCA AGAGGCCCTG ACGCCCGAAA TAGCCAGGAA ACCCCGACCG
    47761 ACCGCCCAGC CCTGGCAGCA GGTGCCTCCC TCTCCCCGGG GTGGGGGGAG GGGTTGCTCC
    47821 AGTTCTGGAA GCTTCCACCA GCCCAGCTGG AGAAAGGCCC ACATCCCAGC ACCCAGGCCG
    47881 CCCAGGCCCC TGTGTCCAGG CCTGGCCGCC TGAGACCACG TCCGTCAGAA GCGGCATCTC
    47941 TTATCCCACG ATCCTGTGTC TGGGATCCTG GAGGTCATGG CCCCTCTCGG GGCCCCAGGA
    48001 GCCCATCTAA GTGCCAGGCT CAGAGCTGAG GCTGCCGCGG GACACAGAGG AGCTGGGGCT
    48061 GGCCTAGGGC ACCGCGGTCA CACTTCCCCT GCCGCCCCTC ACTTGGGACT CTTTGCGGGG
    48121 AGGGACTGAG CCAAGTATGG GGATGGGGAG AAAAATGGGG ACCCTCACGA TCACTGCCCT
    48181 GGGAGCCCTG GTGCGTCTGG AGTAACAATG CGGTGACTCG AAGCACAGCT GTTCCCCACG
    48241 AGGCCTCACA GGGTCCTTCT CCAGGGGACG GGACCTCAGA TGGCCAGTCA CTCATCCATT
    48301 CCCCACGAGG CCTCACAGGG TCCTTCTCCA GGGGACGGGA CCTCAGATGG CCAGTCACTC
    48361 ATCCATTCCC CATGAGGTCT CACAGGGTCC TTCTCCAGGG GACGGGACCT CAGATGGCCA
    48421 GTCACTCATC CATTCCCCAC GAGGCCTCAC AGGGTCCTTC TCCAGGGGAC GGGACCCCAG
    48481 ATGGGCCAGT CACTCATCCA TCCGTCTGTG CACCCATCCG TCCAACCATC ACCCTTCCCT
    48541 CCATCCATCT GAAAGCTTCC CTGAGGCCTC CCCGGGGACC CAGCCTGCAT GCGGCCCTCA
    48601 GCTGCTCATC CCAGGCCAGT CAGGCCCGGC ACAGTCAAGG CCAAAGTCAG ACCTGGAAGG
    48661 TGCCTGCTTC ACCACGGGAG GAGGGGGGCT GTGGACACAG GGCGCCCCAT GCCCTGCCCA
    48721 GCCTGCCCCC CGTGCTCGGC CGAGATGCTG AGGGCAACGG GGGGGCAGGA GGTGGGACAG
    48781 ACAGGCCAGC GTGGGGGGCC AGCTGCCGCC TGGCTGCGGG TGAGCAGACT GCCCCCCTCA
    48841 CCCCAGGTAC AGGTCTCCCT GATGTCCCCT GCCCTCCCTG CCTCCCTGTC CGGCTCCAAT
    48901 CAGAGAGGTC CCGGCATTCC AGGGCTCCGT GGTCCTCATG GGAATAAAAG GTGGGGAACA
    48961 AGTACCCGGC ACGCTCTCCT GAGCCCACCC CCAAACACAC ACAAAAAAAT CCCTCCACCG
    49021 GTGGGACTTC ACCAGCTCGT TCTCAGGGGA GCTGCCAGGG GGTCCCCCAG CCCCAGGAAG
    49081 CCAGGGGCCA GGCCTGCAAG TCCACAGCCA TAACACCATG TCAGCTGACA CAGAGAGACA
    49141 GTGTCTGGTG GACAGGTGCC CCCACCTGCG AGCCTGGAGA GTGTGGCCCT CGCCTGCCCC
    49201 AGCCGCGGTC AGTCGGCTCA GCAACCGCTG TCCACTCCCA GCGCCCTGGC CTCCCCTGTG
    49261 GGCCCAGGTC AAGTCCTGGG GGTGAAGCTA AGTCAGGGAG CCTCATCCAT GCCCAGCCCG
    49321 GAGCCCACAG CGCCATCAAG AAATGCTTCT TCCCTCCATC AGGAAACATT AGTGGGAAAG
    49381 ACAAGAGCTG GGGGGTTCTG GGGTCCTGGG GGATCAGATG AAGGGGTCTG GGAGCAGCAG
    49441 CAGCCTCAGG CACCCCAAAA CAAGGCCCAG GAGCTGGACT CCCAGGGCTG AGGGGCAGAG
    49501 GGAAGGAAGG CCTCCTGGGG GGTTGGCATG AGCAAAGGCA CCCAGGTGGG GGCTGAGCAC
    49561 CCCTCGGCTG GCACACACAG GCCCCCACTG CAGTACCTTC CCCCTCGGAG ACCCTGGGCT
    49621 CCCGTCTCCC GCCTGGCCTG CCATCCTGCT CACCACCCAG AAATCCCTGA GTGCGGTGCC
    49681 ATGTGACTGG GCCCTGCCCT GGGGAGGAAG GAGATTCAGA CAGACAGGAT GCCAGGGCAG
    49741 AGAGGGGCGA GCAGAGGATG CTGGGAGGGG GCCCGGGGAG GCCTGGGGGG CAGGGGGGCA
    49801 GGAGTTCTCC AGGGTGGACG GCGCTGTGCT ATGCTCGGTG AGCACAGAGG CCCCGGGTGT
    49861 CCCAGGCCTG GGAACCCAGC AGAGGGGCAG GGACGGGGCT CAAAGGACCC AAAGGCCGAG
    49921 CCCTGACCAG ACCTGTGGGT CCAGAAGGCA GCTGCGCCCT GAGGCCACTG AGTGGCCCCG
    49981 TGTCCCGAAC CACCGCTGAA ACATGGGACA CACGTTCCCA GGCGGAGCCA CTCCTGCCTT
    50041 CCGGGAGGCT CCCAGCGGGC TCATCGCTCC ATCCCACAGG GAGGGAAACC GAGGCCCAGA
    50101 TGACGAACAT CCCGGCGAGC AGGTCAAAGC CAGCCCCTGG GGTCCCCTCT CCCGGCCTGG
    50161 GGCCTCCCCT CTGCAGGGTG GGAAACCGAG GCCACACAGG GGCTCCATGG GGCTGCCCTC
    50221 TGCCAGGCCC TGGACACCCC GCGGGTGACC CCCGCCTCTA TCATCCCAGC CCTGCCAGGC
    50281 CCTGGACACC CCGTGGATGA CCCCCGCCTC TATCATCCCA GCCCTGGGGG ACAGATGGGA
    50341 GGCCCAAGCG TGGACCCCCT GGCCACCCCC TACCCCACAG CCGGGAGGAG CCGGGAGCTG
    50401 GTGGCCAAGG GCCTAGAGGA GCCCAGACCC CAGGGTGGGG GGGGGGTCTC CCACCCACAG
    50461 CCCTTCTCAG ACGTGACCTG GGGCCACGTG CCTTCCTCCA AGTTCAGTTC CCTCTACACA
    50521 AGGGGCAGGG GTGAGGGTAG TGAGTCTCCC TGAAGGGGAG CCGGGGATTA AAGGAGATGA
    50581 TGCCCGTGAC GTGCTTGGAC CCCAGTGACC CTCGCCCACC CCAGTCACTC CGTCCCCTCC
    50641 TGGGCTCCTT GTCCAGGGCC TGCCTCTGCC GTGCTGTGTG ACCCTGGGCA AAACGCTTCC
    50701 CCTCTCTTGG CCTCAGCCTT CCCCTCTGCT TGGGGAGAAG CGGGTGGTGG GACTTGCAGG
    50761 CCAGAAGCAT CAGGAAGACC ATTAGATTCC TGGGCCAGGG AGCTGGGCAG CCAGGCCCTG
    50821 GGCCTGAAGG GGCAGTGGGG CCGGAGGTGG GAGCAGGGAA GGGAGCGGGT GGGGTGAGGC
    50881 TCTGCCTGCA GCTGGCTGCC CCTGGGAATC CCCAGGCTAA AGTTAACCCT GCCCTGGCTG
    50941 AAACCAGAAC TGCGGGTGCC AGCCGGGAGC TGTAAGGGGA AGAGAAACCG AGCCGCGGTC
    51001 GGCGGGGCGT GGGACGGGGG ACAAACAGGG CCAGGTGTGG CCCGCGCGGC GGGACAGGCC
    51061 AGTTTCAGGG CTGACGTTGT CAGATGTTTG TGCAGCTCGC AGGTGGGGGT GTGCAGACCC
    51121 CCCCACCCGC CTGCGCCCAG CCCCTGCCCA GCCCCGGTCT GGGCCTGATG CTGCCCCCTA
    51181 GCTGCCTCCT CAACATCCTT GCCATCCTGG GTCCTGGGAT CCTGGAGGGC TGGACCCCAG
    51241 GGGAATCTCA GAACTGGCCG GGGTGGCCCC CGCGGTCAGC AGGGCCCCAG GGAGGGGGCG
    51301 GCAGGGTCAC CGAGCCCGTC AGCACAGCAG GGAGGGGCTC CGGCCTCGGC GTCCCAGCCC
    51361 CAGGCGCTCC TGGCTGCAGA CTGAGCCATG GGTGGGCAAC GGGGTGAGCA GAGGCCTCCC
    51421 CACTGCCCAT GACTCCAAGG GGCCCCAGGG AGACGCAGTC CAGCCCTTCA GCAGGAAATG
    51481 TATCCCCTTG TCCATGGCCT CGGGACGCAC TGCCCTTTGG CCCAGCAGCC CTGCTCCTTG
    51541 GGAGCTCCTC ACTGGCCCGG GACCCAGGGA CAACGTGCTG CCCAGCCCTG GGTCCCCACC
    51601 AGCAGCATGT CCACACAGCC TAACGTCCAC AGCCCCAAAG GGCCTCGGAG ACGTGCCGTG
    51661 GGTGGGTTCC ACCGTAGGGG ACGGGGACAG GGACAGGGGA TGGGAGGCGG TCTTATCTGA
    51721 GCCCACCTTT GGGAAAAGGC CATGACTGTC ACAGAGAAAA GACTGCCAGC GTGCACACCA
    51781 ACACGCTGAG TGCCCCCTGG AAGCAAGGCC ACGTGTTTAC TTTCTTCCTT ATGCGCGCCT
    51841 GTTCCTTCTC ATTTCTCGAA GAATGTGACA CTTTCAAAAT CAGAAAACAA AGCAGTGAAC
    51901 TGATTTACGA TGAACGACCC TCTAAAAATG GTGTGGTAGA AGGTTTGAAT GGCATCGTGA
    51961 AAATAACATC ATCCCCAAGA GGTCACAAGA CAAGACCCAG CATATGAGCG TGTGTCTCTG
    52021 TGTCTACAGG GCCATCCGTG TCCGCACCTC TTACCTGGGG CTACCCGGGC GGGTGGACAT
    52081 ACCAGGGATG GTGGTTTTCA CTTGGCCCCC GCCACTCTTT CGATTTTTTT CTACAATGAT
    52141 TATATGTTTA CTGTGTAATT ATAAAAACAC ATGTTTTTAA GTGTTTTCTT TTTCACTTAT
    52201 GTTATTTCAA TTCACTTAAC ATTCAACAAA TATTTATTGC TTACCTGCTA CATCTATGAC
    52261 AGGCCGGGTG CAAGTTTGGG ACTGACCACG TTGATGATAA GAGAGAGAAT CATCTCTCCT
    52321 GATCAGTGGT CCAGGGTGGT GGGGGTGGTT GTTGGAAAGA GGTCATTACA GCGCTAAGAT
    52381 GGAGTCTTAC CTCTGAGTCG TAGGTCGTGT CCAAATCCAT GAAGCTCTCT TACAACCCCA
    52441 GCTCCACACC CAGGCAGAAA GGCTACTGAG CCCCTAAGAA CAGACAGGGC TATTGCAGGG
    52501 GTGCTGAATC CCTACCAGCA GGCAGGGAGC AAAGAGGATT GGAGAAAAGC AGCCCCTTTC
    52561 AGAAGCTCTC TGGTGGTTCA AAGGTTAAGA CCTTGCCGTC CAGTGCAAGG GATGTGGGTT
    52621 GGACCCTGGT AGGGGAGCTA AGACCCGTAG GCCTCATGGC CAGACCACCA GAAAATAAAA
    52681 CAGAAACGAT GTTAGACGTT TAATAAAGAC TTTAAAAATG GTCCACGTTC AAAAAGCTTT
    52741 AAAAACAAAG AAAAGCAACC CCTTTGAATA CAGCTAGAAC CGTAAGAGTG AGCCATTGCA
    52801 CACCAAAAGT GTAAGCAATT TCTGCAGAGT TTAAAACAAA AAAGACCAAA AAAACCTTTC
    52861 CCACAAATAA AGTAGACTGG CCTGGGACAA AGTCCAGGAT TGGCGGAACT TATAAAGGAA
    52921 AGAGGCACTT TTTGAAGCAG ACCAGAATAC GCTTCAGGAG CGTTTAACCA GTTCTTTGGA
    52981 CAGGAAGAAT TACGTGGTAG ACGACAGCAC AGTCTGTGTG GGTGAAGACC TAGGCTGACA
    53041 AACTTCTCAG TGCATCTCAG CAATCCTCTG TCCCTGGGTC TGACCTGGTC GATGTGGTAG
    53101 TCCTAGAGGC CACCGCACAG CTCCATCCCG AGGAATGCAG AAGAGGAGGT AAGTATGCCG
    53161 TCTCACAGGA TACCTGGCTC AGTGAGTGAA AGAAACAGGT TAGCAATAAT TACTGGCAAC
    53221 TCACTCACAC AGGGCTTGTT AACTCGAGTC GTAGTTACAG GAACCGAAGG ATCTTGTATA
    53281 GACGTCCTTC CTTTCTCTTA TACTCCTAAA CACTCTATTT AGATCCTCCA CTTAAGGGGC
    53341 TTCCCTGGTG GCTCAGACAA GAAAGAAGCT GCCTGCAATG CGGGAGACTC AGGTTTGATT
    53401 CTTGGGTCAG GAAGATCCCC CGGAGATGAG AATGGCTACC CACTCCAGTA TTCTTGCCTG
    53461 GAGAATTCCA CGGACAGAGG AGCCTGGCAG GTTACAGTCC ATGAAGTCAT AAAGAGTCGG
    53521 ACACAACTGA GCAACGAGCA CGACACACAC AAAGTCCCTG CAGCTGGCGG CCCTGTAGAT
    53581 GACATGAGCT CGCCTCAGTC GCTCGCTCTA CACTCTCTCC CCAGAAAAAT ATGGTATTTA
    53641 GCCCAATTCA GTGGGTCTGG CACTGTGACT GTGAGTTCAA ACAGGCAGGA AGTCAACAGC
    53701 CATCTCTCCA GCCTGCCAGT CTCCTGCCTC AGCTCCCACT CCTCGACCCC CTCCGCAAAG
    53761 GAGGAGGCGC AGCCCCTCCC CGGGCATCTC ACCCCCAGCC CCGTGCCTGA CCGCTTCAAG
    53821 GCTCTCGGCA AAGAGTTTGA ACGAGGGTGG GAAGGAAGGA AGGGAGATGA GACGGGAGGG
    53881 CGGATGAGTG GGTAGGTTTG GGGGTGCACG GTTGTGTGGG TAGCTGGGTG GGTGAGTGGA
    53941 TGAATGGATA GCTGGGTGGG TAGGTGAATG GATGGGATAG CAGGTGAACG ACTGCTGGAT
    54001 ATGTGGGTGG ATGGGTGGGT GTGTGGTTAG ATGGATGGAT GATGGCTGTG AGGGTGGATG
    54061 GGTCAGTGGC TGGGTGGGTA GATGAGTTAT TGGACCGGGG GTTCATGAGC AGGTTAGTAG
    54121 TCAGATGCGT GAATGGACAG TTGAGTATGT GGGTAGGCCC TAGTCATGAA GAACACAGAC
    54181 CCTCAGCCCC GGGCTGCTCT GTGGAAAGCG GCTGAACTCA ACACCCAGGT TCCAAACCCA
    54241 GCTCTGGTCC TGACTTGGTG TAACCTTGGC CATTTCCTCA GTGCCTCGAA GCCTTGCCCC
    54301 CTGCAGGCCA AGAGGACCCC AGCCCCTGCC CTGCCCACCT CACAGGCCGG CGGGAAGGAC
    54361 AGACTGCGTG GAGATGCTTT AGAAGCCCGA GAGACTGTTC AGGCACACTC AGGCCCTTTA
    54421 AGGGGCCCCT GCACTCCGAC CCCGGGCTTG GATGACATCT GCGGTGGGAA GAGCCTGCAC
    54481 TTGGGGCCCA GACAGACCTG GGTTCCAGTC CTGGCTCCAC CCTTTTCCAA GTATGTGACC
    54541 TTGGGCAGAT GACTGTCCTC CTCTGGGAGG TGGACACGAT GACCGCTCAG GGCTGTGGGA
    54601 GGATTCAGGG GGATCGTTCG GGAAGGCACT CAGCACAGCA CCCACCAAGG GTGCAGGGAT
    54661 GGATCTGGGG TCCCAAAGAA GAGGCCCAAT CCCGCGTCTT GGCAGCAAGG AGCCCTGGAG
    54721 ACTGGGAAGT GTCCAGGACA CTGACCCAGG GGTTCGAGGA ACCCAGAAGT GTGTCTGTGA
    54781 AGATGTGTTT TGTGGGGGGA CAGGTCCAGA GCTTTGAGCA GAAAAGCGGC CATGGCCTGT
    54841 GGAGGGCCAA CCACGCTGAT CTTTTTTAAA AGGTTTTTGT TTTGATGTGG ACCATTTTTA
    54901 AAGTCTTCAT TGAATTTGCT ACAATATTGT TTCTGGTTTA TGCTCTGGTT TCTTCGGCTG
    54961 CAAGGTTTGT GTGATCGTAT CTCCTCAACC AGGACTGAAC CCACAGCCCC TGCACTGGAA
    55021 GGCGAAGTCT TAACCCAGAT CGCCAGGAAC GTCCCTCCCC TCACTGATCT AATCCAAGAC
    55081 CCTCATTAAG GAAAAACCGA GATTCAAAGC TCCCCCAGGA GGACTCGGTG GGGAGGAGAG
    55141 AGCCAAGCAC TCAGCACTCA GTCCAGCACG GCGCCCTCCC TGTCCAGGGC GAGGGCTCGG
    55201 CCGAAGGACC ACCGGAGACC CTGTCGGATT CAGCAGTAGG ATTGTGAGGA ATTTCAACTT
    55261 ACTTTTTAAA TCTGTCTCTC AAGGCTGTTA CAAGCGGACT TTACCAGTAA CTTAAAAGTT
    55321 GAAAGGGACT TCCCAGGCGG CACTTGCGGT GAAGAACCCG CCGGCTGGTT TTAGGAGACA
    55381 TAAGAGATGT GGGTTAGATC CCTGGTTCAG GAGGATTCCC CTGGAGAAGG AAATGGCAAC
    55441 CCACTCCAGT ATTCTTGCCT GGAAAGCCTC ACGGACAGAG GAGGCTGGCG GGCTACAGTC
    55501 CACGGGGTCG CACACGACTG AATCGACTTA GCTTCAAGTT GAGACAGGAA GAGGCAGTGA
    55561 CTGGTGGCAA AACACCGCAC CCATGCTCCC AGGGGACCTG CAGCGCTCTG GTTCATGAGC
    55621 TGTGCTAACA AAAATCAACC CAACGAGAGG CCCAGACAGA GGGAAGCTGA GTTCATCAAA
    55681 CACGGGCATG ATGTGGAGGA GATAATCCAG GAAGGGACCT GCCAAGCCCA TGACAGACCG
    55741 GTGTCCTGTC TGAGGGCCGT CCTGGCAGAG CAGTGCAGGG CCCTCCGAGA CCGCCCGAGC
    55801 TCCAGACCCG GCTGGGGGCT ACAGGGTGGG GCTGAGCTGC AAGGACTCTG CTGTGAGCCC
    55861 CACGTCAGGG AGGATCACCT TGTTTGTTTT CTGAGTTTCT CTTAAAATAG CCTTTATGGG
    55921 TCCTGGTCTT TGGTTTTAAA ATAACAACTG TTCTCCGTAA ACAACGTGAA AAAAAACAAA
    55981 CAGGAGGAAA ACAACGCAGC CCGGGCATTT CACCCGGAAG AGCCGCCTCT AACACTTTGA
    56041 CGGGTTGCCT TCTATTTTAA CCCTGTTTTC ATTGTAAACT GTAAAAACCA CATCATAAAT
    56101 AAATTAAAGG TCTCTGTGAA GTTTAAAAAG TAAGCATGGC GGTGGCGATG GCTGTGCCAC
    56161 ACCGTGAACG CTCGTTTCAA AACGGTAAAT TCTAGGGACC CCCTGGTGGT CCAGTGGGTG
    56221 AGATTTTGCT TCCATTGCAG GAGCCGTGGG TTTGATCCCT GGTTGGGGAA CTAAGATCCC
    56281 ACATGCTGTA TGGAGTGGCC AAAAAGAATT TTTTGTAAAT GGTGAGTTTT AGGTGACGTG
    56341 AATTTCCCAT TGATGCACTT CACAGGCTCA GATGCAGCCA GGCCCTCAGG AAGCCCGAGT
    56401 CCACCGGTCC TTTACTTTTC CTTAGAGTTT TATGGCTTCT GTTTCTGCCC TTAAACCCAC
    56461 CATGTTTCAA CCTCATCTGA TTTTGGACTT TATAATAAAG TTAGGCTGTG TTTCAGGAAA
    56521 CTTTGCTCAG TATTCTGTAA TAATCTAAAT GGAAAGAATT TGAAAAAAGA GCAGACACTT
    56581 GTACATGCAT AACTGAATCA CTTTGGTGTA CACCTGAAAC TCGAGTGCAG CCGCTCAGTC
    56641 GTGTCCGACC CTGCGACCCC ACGGACTGCA GCACGCGGGC TTCCCTGCCC ATCACCAACT
    56701 CCCGGAGTTC ACTCAAACAC ATGTCCGTCG ACTCGGTGAT GCCGTCCAAC CGTCTCATCC
    56761 TCTGTCGTCC CCTTCTCCTC CCGCCTTCAA TCTTTTCCAG CATCAGGGTC TTTTCAAATG
    56821 AGTCAGTTCT TCACACCAGG TGGCCAGAGT ATTGGAGTTT CAGCTTCAGC ATCAGCCCTT
    56881 CCAACGACCC CCCATACCTG AAGCTAACAC AGTGCTAATC CACTGTGCTG CAACATGAAA
    56941 GAAAAACACA TTTTTTAAGT TTAGGCTGTG TGTGTCTTCC TTCTCTCAAC ACTGCGTCTG
    57001 ACCCCACCCA CACTGCCCAG CACTGCATTC CCCGTGGACA GGAGGCCCCC TGCCCCACAG
    57061 CTGCGTGCCG GCCGGTCACT GCCGAGCAGA CCTGCCCGCC CAGAGTGGGG CCCCTGGCAC
    57121 TGGGGACAAG GCAGGGGCCT CTCCAGGGCC GGTCACTGTC CACTGTTCCT ACTGGTTTTG
    57181 TTTTCAAAAG TGGAGGCAGC GTAATATTTC CCTGATTATA AAAAGAAGTA CACAGGTTCT
    57241 CCACAAATAA AACAGGGGAA AAGTATAAAG AATGGAAGTT CCCAGCACAG CCTGGAGATC
    57301 ACGCCGGGTG CACCTGGGGT GTCCTTCCAG GCTGGACCTC ACATTTCACG CAGACATCAG
    57361 AAGGCTGCGA GATCTACCCA GAAGGCTGGG TAGATGGGGG ATAGGTCAGT GACAAACAGT
    57421 AGACAGAGAG ATATACAGAC AGATGATGGA TAGACAGACG CTAAGACACC GAGCGAGGGG
    57481 ACAGACGGAT GGAAGACACC ATCCTTTGTC ACTGACCACA CACCCACATG GGTGTGGTGA
    57541 GCCGGCTGTC ATACTTGTGA ACCTGCTGCT CTCACAACAC CAGCTGGGTC CCTCCAGCCC
    57601 CAGCGTCCCA CACAGCAGAC TCCCGGCTCC ATCCCCAGGC AGGAATCCCA CCACCAACTG
    57661 GGGTGGACCC TCCCCGCAGG AAGGTCGTGC TGTCTAAGGC CTTGAGAGCA AGTTACAGAC
    57721 CTACTTCTGG GAAGACAGCG CACAACCGCC TACCCCGCAG AGCCCAGGAG GACCCCTGAG
    57781 TCCTAGGGAA GGGACCACGC GGCCTGGACG GGGAGCGGCC CCAGGACGCT GCCCCCAACC
    57841 TGTCCCACCT CACTCCTGCT CTGCTCTGAG GCGGGGCGCA GAGAGGGGCC CTGAGGCCTC
    57901 TTCCCAGTTC TTGGGAGCAC CCACTGGGCC TGAACCAGGC CAGAAGCCCC CTCCTCAAGG
    57961 TGTCCCCAGA CCACTCCCCT CCACCTCCGG TTGCTCTGTC TCCTGGCAGC AGGGAGCCCC
    58021 AGTGAGAAGA GACAGCTCCA GGCTGTGATC TTGGCCCCTG GCTGCTCTGG CAGTGTGGGG
    58081 GGTGGGGGTC GCTGGGAGGC CATGAGTGCT GGGGGTCGGG GCTGTGAAAG CACCTCGAGG
    58141 TCAGTGGGCT GTTGGTCGGG CTCTGCGAGG TCCGCACGGG TAGAGCTGTG CCAGGACACA
    58201 GGAGGCCTGG TCAGTGGTCC CAAGAGTCAG GGCCAAAGGA AGGGGTTCGG GCCCCTCTGG
    58261 TTCCTCAGCT TCTGAGGCCG GGGACCCCAG TCTGGCCTTG GTAGGGGGGG ATTGGAGGGG
    58321 AGGCCCCCAG CCCCAGGACC TCCAGGAGCG GGACCTGGTT CCCCAACCCA CCGGGCCCTG
    58381 ATCTCAGAGT CTGGGCTCGG CAGGTCCATC GGGGGTCCTG GCTACTCTCT CTGGCTGACT
    58441 CAGAAGTCAG TGGGGGAGGT GGGGGTTACT GAGGGACCAG GAAAGGGGGC TTAGAGATCG
    58501 GGGGCCACCA CCCAGCTTTC ACAGGAGAAA CGGAGGCCCA CAGGGCGCAA GGGACTCGCC
    58561 AGGGTCACAC TGTGAGCCCA GCTGCTGGAC TCAAGGCCCA GGGCTGTCCC CCACCCATGA
    58621 TGGCCCTGAG GGCCCCCTCA ACTCGGACAG GGTCAAGCCC CCTGACCTGC ACCCCCAAGA
    58681 CTCAGGCTTG GCCGTTCTAA GCTGAGGAGC CCTCGGGGTC TGCAGTCAAG GCCACGGGGC
    58741 CCAGCACCCC ACCCCACCCC CCCCGCCACC CCGTCCTGTG CAGGCCTCTG GCCAGGCTCC
    58801 TGTCGGCTCA GTGGGCCAGG GCCTGGCTAG GTTCCTGTAG GCCTCGCTCC CGTCTTCTTC
    58861 CTCTGCAGCC CGGTGTGACA GCCCTGTAGC TGAGGCTCCG GCCTCCCTGA GCAGGCCGCT
    58921 CCCACGGGGC CACAGGCATG GGGTACTGTG CTTACCCACC CCAATGCGAG GGTATGCAAT
    58981 GCCAAAGAGG AGGGGCCTGC CAGGCCTCCG GGAGCAGAAT GAGCCCCCCA GACGGAGGTC
    59041 CCATCTCACA GGCCGGGGCC TGGGGGCCTC GGTCCACGCC TGGGGCCTAG AGCTGGGCCT
    59101 GTCGGGAGCT GACCCGGGGG GCAGGATGGC TGAGCTCAGG AGCCCAGCCA GGCGGTCACT
    59161 ATGCACCACG TTCGCGGGGG GAGGGCGGGT CACCCACACA GCGGAGCCAC AGCCCCCACC
    59221 TGACGGTACT CGCGGGCCAC GTGGAGGTGT CCGGGCTGCG TTCCTGACCG CGTGCCCGTG
    59281 TCCCCGCACC GTGCGCCCCC GACAGATGCA CACACGTATG CGAACATGCT CACATGCGTG
    59341 CACGCACATA GGGCCCGGCG GACAGCGCCC TCTAGCGGCC ACAGAGCCAG AGTCACAAAG
    59401 CTCACAGGCA CGTCTGTAAA GACCTGGATG CCCGAGTCTG GGAAGACTGT TCTCTTTCAC
    59461 AGCCTGGGGG GTGTGACCTG GCTAAGGTCA CACAGCAGGT AAGCAGCGCG GCCCTGACCC
    59521 CTGACCCCGC GTGCGTGCAT GGTAAGTCGC TTCAGTCGTG TCCGACTCCT TGCCACCCCA
    59581 GAGACTGTAG CCCACCAGGC TCCTCTGTCC AAGGGATTCT TCAGGAAAGA ATACTGGAGT
    59641 GGGTTGCCAT GCCCTCCTGT AGGGGATCTT CCCGACCCAG TGATCGAACC CGCGTCTCTT
    59701 ATGCCTCGTG CATGGGCAGG CGGGTTCTTT ACCACCAGGG AAACCCCCAC TGGCCCAGAT
    59761 TCCAGCTCAT TCCAGCTCCC AAGGCCCTGC CAGAGCCCCC TGGGACAGAA AAGCTGGGGG
    59821 TCTTGAAAAG CTTCCACCCT CCTCACACAC GGTGCCTGCT CCCCCCAGGA GGGGGGAGTC
    59881 ACATGCGGAG AGGAATCTCA GGACCAGAGA GTCCCCAAGC CCAGTCTCCT CTGTGCTGAT
    59941 GGGATGGGGT ATCAGGAGGG GAGGGGCTGG GTTCACAGAA ACACCGAAAT GCCAAGATGA
    60001 CAGACACAGA CGGGACACCT GCCACACAGG AGCAAGACAC ACTGACCTGT GTCCACTCGC
    60061 TTGGCTCCTC TCCCGAGGGA GGAGATCCGG TCACACCAGG TCCCCTCGTT CCCCAGGCCC
    60121 AGGTCTCTCG TTCCCCAGAA GAAGCAAGCA CCATCCAGTC CACACACATA GTCCCTGATC
    60181 GGACTCGAAG CCCAGCACTG CTCTGGGCCC TGGGGATACG GCAGGGGCCT CAGAGACCAA
    60241 GACCTGCAGC AAAGTCCCAG GAGGTGAAGC AGGCGGACAG GCAACACATT GCATTCCAGT
    60301 GGGAGGTGTG ATGAGCTCTT TAGGAAAGGA AGCGGTCGGG GTGACAACTG CTGGTTTAAA
    60361 CTAAGATCAT GGCATCCAGT CCCCTCACTT CATAGCAAAT AGAAGGGGAA AAAGTGGAAA
    60421 CAGTGGCAGA TTTTATTTTC TTGGGCTCCA AAATCACTAT GGATGGTTAC TGCAGCCAGG
    60481 AAATTAAAAG ATGTTTGCTC TTTGGAAGGA AAGCTACGAC AAACCTAGAT GGTGTATTAA
    60541 AAAGCAGGGC CAATGAAGGC CCATCACTTT GCCAATGAAG GTCCATCTAA TCAAAGCTAT
    60601 GGGTTTTCCA ATAGTCATGT ACCGATGTGA GAGCTGGGCT ATAAAGAAAC CTGATCACTG
    60661 AAGAACTGAT GCTCTCCGAC TGTGGTGCTG GAGAAGACTC TTGAGAGTTC TCTGGACAGG
    60721 AAGGAGATCC AACCAGTCAA TTCTAAGGGA AATCAACCTC GCATATTCAC TGGAAGGACT
    60781 GATGCTGAAG CTCCAATACT TTGGCCTCCT GATGCAGAGA GCTAACTCAT TGGAAAAGAC
    60841 CCTGATGCTG GGAAAGATTG AGAGCAGGAG AAGAAGTGGG CAGCAAAGGA TGAGATGGTT
    60901 GGATAGCATC ACTGACTCAA TGGACATGAG TTTGAGCAAA CTCCAGGAGC TAGTGAAGGA
    60961 CAGGGAAGCC TGGCGTGCTG CAGTCCATGG GGTTGCAAAG ACTGGGCACA GCTGAGCCAC
    61021 TGAACAAGAG AGGCCACCCC CGAATGAAGA AGGGGAGCCC CAGCAAGAGC CTGGGGAGGA
    61081 GCAGTCCTGG CAGAAGGGAC AGCGAGTGCA CAGGCCCTGG GCTCAGGCGT GTCTGACAAG
    61141 CCGCAGGAGC AGGAAGGCGG GCAGTGTGGC CGGATTCAAG GCAGGGGTCC GGGGAGGGGC
    61201 CGGCCCTCGG GGCCTCACAG AGCAGGCTGG GCCCCTGAGG TTTGTCCAGG TTCTCAGGTG
    61261 ATGCTGGATG GCATCGTGTC ACCACACCTG CCCCTTCTAA CTTCCTGCAC ACTCAGGTCC
    61321 TGGGTGTATG TCAAGCAAGG GGAGCCAGAT GGCTCAGCGT GTGGACACAC GGCGGGTGCC
    61381 TGCCGGTCAG CGAGGACGGG CATGGCGCGG TTCCGGCTCT TCCATCGCAG ACATGGCTGG
    61441 GGGGCCCTGT GCCTTCCCGG TGCACAGGTC AGCACTTCTG GGGGGCACAG GCCCACCTGG
    61501 AGCCGCAGAG TGGGGCGTCT CTGTGAGGGT CACTGCGACC TGCCGCCACC TCTGCAAAGC
    61561 AGCTGGACTC ACGCCCGGGA CAGGCCGCGC CCGGGCCTGC ATCGCGCCCC TGCTCGGAAC
    61621 GTGGCCCCTG GACACTGTGC CCAGCGCACC CCCGCGGTGT CAAATGAGAA CCGGGGGAGG
    61681 CCCCTGACCC CGCCCCGGGC CCCCACTGCC CCTGCCTGGG GTGACGCCAG GCTCCAGCGC
    61741 TCGGAGTCCC AGGGTGTCAC TCGGAGGCTC CGAGTCCCTC CGTCTGGGCC CCTTCCTCCG
    61801 GGTCAGCACT TCCAGCGGGG GGACAGCGAC GCCTTGCGGC CACGGAGGGC ACGGCCGGCC
    61861 CCGGAGCCGG GCGGCAGCGC CCAGGTAGAG GGGCGGGGCG GGCAACTCGG CTGAAACCCG
    61921 GACCGCTGTG CCCGCGGGGC CCCTCCAGGC TGCCTCCTCT GCTGCGGGCA GGACGCCCAG
    61981 CTTCTGAGTC CTTGGGACGG AGAGGGAGAC TTCTGAGTGC GCGACACAGG GAGCCAAGTC
    62041 CTTCTGGTCG TGGCCTCGAA ACTGCCCAGG CGACCGGGAG GAAGAGGGCT GCTCTCCCGC
    62101 AGGAGGACCT GAGCGTCTCT CAACCAGAAT CGGCTCCTTG GCTTCGTCTC TTAAAAAAAG
    62161 GTAAAGGGAA TTTTGCGCCT TGAGCCAGCT CCTGGGGAAT TTACCAATCA GTTTGGGGAA
    62221 AACTGGCAAC TTGACCACAT CGAATCTTTC AATCCATGAA TATCCTGGCG CTCTCTCCCT
    62281 TTAATAGGTT TAATAATTCT CAGTGAAGCT GCGTGTGGAG TTTTCCTCAT AAACGAATGT
    62341 CTTGGGCATC TCTGTAGATT CACGCTAGTA AACCTACACA TTTGAAAGGG AAAGTGTTAG
    62401 TCGCTGGGTT ATGTCCGAGT CTTTGCGATC CTCTATCCAT GGGATCCTCC AGGCAAGAAT
    62461 ATTGGGTGCA AGAAATGGAG TGGGTTGCCG TCTCCATCTC CAGGAAACTT ATATATTTGG
    62521 GGGGGTGGAT TCTATTGAAA TATCGATTTA CAATGTTGTG TTAATTTCTT CTGTACAGCA
    62581 AAGCAACTCA AGTACATACA TATATATATA CTTTTCCTCA GTCTTGTCGA TTATGGTTTC
    62641 TCACAAGCTA CTGAATATAG GTCCCGGTGC CACACAGTAG GACATTGTTG TGTATCCTTT
    62701 TTATCCATCT TCTATATAAC AGCTCGCTTC TGCTGATCCC AAACTCCCAC TCCATCCCTA
    62761 CCCACCCTCT CCCCTGGGAA CAAGTCTGTT CTCTACAAGC TGATATATTT TATGCAATGG
    62821 TAAAATATAT CCTCGTAAAT GTTATTCTCT ATTCATTTGC TATTCTATTC ATAGACTGTG
    62881 CTGTTGGAGA AGACTCTTGA GAGTCCCTTG AACTGCAAGG AGATCCAACC AGTCAATCCT
    62941 AAAGGAAATC AGTCCAGAAT ATTCATTGGA AGGACCGATG CTGAAGCTGA AACTCCACTA
    63001 CTCTGGCCAC CTGATGCAAA GAACTGACTC ACTGGGAAAG ACCCTGATGC TGGGAAAGAT
    63061 TGAAGGTGGG AGGAGAAGGG GACGCCAGAG GATGAGATGG TTGGATGGCA TCACCGACTC
    63121 GATGGACATG AGTTTGAGTG AACTCCAGGA GTTGGTGATG GACAGGGAGG CCTGGCGTGC
    63181 TGCGGTCCAT GGGGTCAAAA AGAGTCGGAC ACAACCAAGC GACTGAACTG AACTGAGAGA
    63241 CCCAGTAAGT CTTTATACTT GAAATCGCAC CTCGTAAATT TGCTACACTA TTTTTAATAG
    63301 ACTATATTAA TCTGTCTACA TTCTGCGGGA CTTGCTACAC ACTCAAGCAC ACCCTCTGTG
    63361 AAGAATGACA GCTCTGTTGC TATCTTCCTG ATGCTTATGT ATTCCATTGC TTTCCCAGTC
    63421 ATTTCAAAAG CTGGTTTGGG AGGGGAGAGC TCCACTTCAG GAACAGTAGC ACAAAGACGT
    63481 CCACAAACAC ACCCCCAAGC CAAAGGGCTG AAAATTATTT TTTAAATTTA TGTTTATAAC
    63541 AGTATTTAAA TACATGTATA ATATGTTTCT AATTATTTAT AATATCTGAA TATGTTTATA
    63601 AATATATATA CAATATATAG GTAAATTTAT TTATATACAT GTGTTAGTCA CTCTGTTGTA
    63661 TCCAGCTCTT TGCAACCCCA TGGACTGCAA CCTTCCGGGC TCCTCTGTCC ATGGAATTCT
    63721 CCAGGCAAAC ATGTTGGAGT TGGTTGCCAT TCCCTTCTCC AGGGAATTTC CCCAAACCAG
    63781 GGATCGAACC CGGTCTCCTG TACTGCAGGC AGATTCTTTA CTGTCTGAGC CACCAGGAAA
    63841 GCCCAAAGTT ACTTCTACTT ACAATTATGC TTATAATAAT ATATACTTGC TTATAAATAC
    63901 ATTATAAACT ATTATAAATA TAACATATAC TTGCTTATAA TTATGCATTT ATAATATATG
    63961 CTTATAATTG TCTGCATGTA TTTGTTTTAT ATATTAATTT TAAATTTCTG TATCAGTTCA
    64021 GTTCAGTCAC TCAGTCATGT CCGACTCTTT GCGACCCCAT GAACCGCAGC ACGCCAGGCC
    64081 TCCCTGTCCA TCACCAACTC CCAGACTTCA CTCAGACTCA CGTCCATCGA GTCAGTGATG
    64141 CAATCCAACC ATCTCATCCT CTGTTGTCCC CTTCTCCTCC CACCTTCAAT CTTTCCCAGC
    64201 ATCAGGGTCT TTTCCAATGA GTCAGCTCTT CGCATTAGGT AGCCAAAGTA CTGGAGTTTC
    64261 AGCTTCAACA TCAGTCCTTC CAATGAACAC CCAGGGCTGA TCTCCTTTAC GATGGACTGG
    64321 TTGGATCTCC TTGCAGTCCA AGGGACTCTC AAGAGTCTTC TCCAACACCA CAGTTCAAAA
    64381 GCATCACTTC TTCGGTGCTC AGCCTTCTTC ACAGTCCAAC TCTCACATCC ATACATGACC
    64441 ACTGGAAAAA CCATAGCCTT GACTAGACGG ACCTTTGCTG GCAAAGTAGT GTCTCTGCTT
    64501 TTTAATATGC TGTCTAGGTT GGTCATAACT TTCCTTCCAA GAAGTAAGCG TCTTTTAATT
    64561 TCATTGGAGC CCCCAAAAAT AAAGTCTGAC ACTGTCTCAA CTGTTTCCCC ATCTATTTCC
    64621 ATGAAGTGAT GGGACCAGAT GCCATGATCT TCGTTTTCTA AATGTTGAGC TTTAAGCCAA
    64681 CTTTTTCGCT CTCCTCTTTC ACCTTCATCA AGAGGCTTTT GAGTTCCTCT TCACTTTCTG
    64741 CCATAAGGGT GGTGTCATCT GCATATCTGA GGTTATTGAT ATTTCTCCCG GCAATCTTGA
    64801 TTCCAGCTTG TGTTTCTTCC AGCCCAGCGT TTCTCATGAT GTACTCTGCA TATAAGTTAA
    64861 ATAAGCAGGG TGACAATATA CAGCCTTGAC GTACTCCTTT TCCTATTTGG AACCAGTCTG
    64921 TTGTTCCAAG TCCAGTTCTA ACTGTTCCTT TTATACAGTC TATAAATAAT ATTTTTATAT
    64981 AAATATTTAA AGTCTTTCAA TATATTTAAA GTGTCTGGAA ATAGACCTAA GGGCATACAA
    65041 AAAATGGAAT ATTTATTAAA GACAATCTTC TGAAATTTGG CAAGAGCAGG GACAGTCTGT
    65101 CTAGAGCATC TCAATCATGA CCTGTTTCCT TCCTCCCGTT CCCAGCCCAA CATGAGGCAC
    65161 CTCCACTCCA AGCAACTGCG GAAAGAACCC AGGGCACCCT CTCCACCGAG CTCCGGGTCA
    65221 AGGTCGCATC TTCTCGACAT TGTCCCCAGG GGAACTGCTG AGAGGTGAGA TCTCCGAGAC
    65281 AAGGATGGGG ACATCCAAGC CGGACCCCGA GGTTTGGCCA GCGGATGTAA TGCCGCGTTC
    65341 TGCCGGCAGA CGGTGCTAGA GGAACGCGAA ACACAAAAGC GGCCATAAAG CGCCTTTGCT
    65401 TTCCTGGTTT CCCTCCCTTC TATCGAGCAC AGGAGCCAGT GATGATGGCC CGTGTCTGCT
    65461 CAGCAGCCCT GACGGACCAG TTCAGCAGGC ACTCAGGCCC CACTCTGTCC ACCAGGCGAC
    65521 CCCTTCTGCA GTAGACCAGC CCTGGGCTCC CACACCTTCT GACCAGTTGG GGGCCACTTC
    65581 TGTGCACCAG CCCGGGCCAC GCCCTCCACG CTGTCTAGCC CGGGGCCAGG TAGGTTTTTT
    65641 CTGCACCCTA GGACCTGGAA TCGGCCCCCT GTCCTAAGAC TTCACCTGAT TTTATGTGTC
    65701 ACCCCAGATC TCAGCACCGA TGCCCCCACC TTTGGTAGGG TAGGAGGGGG TGAGGGCGGC
    65761 CCCTGAGATG GTGAAACTGC GGGTCGTGAT CAGTCAAATC CATTCCGCCT CCCCGCACTA
    65821 ATCAAGGGTG TTTTAAGACT TGAACGTCCT CCAGTCACGA AGCCAAAACA ATAAAATACC
    65881 CGCCCGGAGT GTTCTCTAGA AAGCCAGACT CAGCAGCGTC TAGTTGGAGC TGAGCTGTTA
    65941 GGACTGGATG GACCGCTGAC CCTCCCACTG GGCGTGGCCG CGTGTCCCTG GAAGCTCCGC
    66001 CTCCAGCTCG CGCCGGAGGT CCTCGCACCT TGTCCATCGC TTTCCCCAGG CTCCCCACTC
    66061 CCCACGCCAC CTGCTGCTTG GTCTTCATCC GTGAGCACCC AGCCTGTGCC CGCAGGGAGG
    66121 CAGATTCCAG AGCGTTCTCT GGTTGCCTTG TGGATGAACC CGCTCTTTGA TGCAAACCTG
    66181 ACATCTCAGT ATTTTGGCCT GCTGTTTGTA GGGGGGAAAA ATGTTCCCTA ACAATAGTAA
    66241 AACCATTACA TGTAGCATTC AGAATTCCCT CACCGCCGAA TCCCCCACAG ATTGCTGACC
    66301 ACCCTAGTTT TGTCTTTGAC TCCCTGCAAT GGTGAATCTT CTAGAAAACT TTGGTCTAAC
    66361 CCAGGCCTCT GAAAGGACCC CAAGACAGCC CCTTTTCCCG GTCACTTCAC TGCTGACCAG
    66421 CAAACCTGGG CGGAGGACAG TGCTGAGATG CCTCAATACA TCCTTTAGGG TCGCCCCTCC
    66481 ATCTGCTGAG ACCGCTGCAC AAGTCCACAA CCAGAAGGGC AACGCTGGAC ACTGACCTGG
    66541 GAGGGACAGC GGGCCAGAGA CTGGGGGAAA CCCGTGTCAG GACAGCCCAC AGCTGACCCG
    66601 GCTCAGGGGG ACGCGATGCC TGTGGGCGCG ATGCAGGCTA ATAGCTCGGC CCCTGAGCCG
    66661 ACGCGCCCCA AACGTGCCTC CCGGTAAAGG ACCATCATCA TCGTCACGCG AGCATCTTCT
    66721 CTAATAAAAT ACAGCCCAAT GACTGGGAAC ACCAGGAGGA GATCTTTCCA CACTAGAGGG
    66781 CGCCAGAGAC CGCGGGGTCG CACCTGGGCT CCCGGGGCTG CCGCGCAGAG TCTGTCCGCC
    66841 AGGGGGCGCG AGCGCTGGCC ATGGGCTGGC CCTTCCGGTC AGCTGTGATG GGCAAAGAAG
    66901 GGTCTAGTCC CAAGGGGACT GTGTGATGGG CTCTCGAGGT TAGGGGTGCT CCTCACCCCA
    66961 GAGGGGTCAA AAAGTTAGGA GTCAAGAAAC AAAGCCTTTG GTGCATGAAC TAATGAGTGA
    67021 CCAGCAAAAA ATATATATTT TAAAATAAGG TTAGATTTGA AGATTAGGCA GTATTGGGGA
    67081 CATACTTAGA CTAAAATTAT TCACTGGGCA TTCTGTGTTT TATCTGCCAT CCTACTCATG
    67141 AGAGATGAAC AAAACAGAAC TGCGAGGACT GTCTTTTTTC TTTGCTCCTT ACTGTTGTAT
    67201 GCCTTTGTAT TTATCAACCA CGTTCTTTTC TTCTCCGTAT TGCTTTATGT AGGAGTTGTC
    67261 AGAGGTTAGC AGAATGTTCC GTGGAACTGT GAGTGGATCC GAGGACGAAT TAACACAATT
    67321 GGCTGTGATT ATAATGACTC TTGGGAGCAG CTGTTTTTCA TTTTGGACGG AGGGTGCTCT
    67381 CTCGGGGTCA AGGATGGGGC ACCCAAACGG ACACCGAGGT TTCTGTGCAG CGGGTGCCAT
    67441 GCCGGGCTCT GCCAGCAGAT GGCGATGGAG GAACGCGCGA GGCCACCGCG GCCAGAAAGC
    67501 GCTTTTCCCG CTTTCCTTCC TTTTATTGAG CACAGGGGCC AGTGGCGGTG TGAGGATGGC
    67561 CCCGGGTCCG CTCAGCAGCA GCGCTGACCG ACCGTCTAGT GCACGTGTGG CCCCGATCTC
    67621 AGCACCGAGG CCCCCCCTTT GGCAGGATAG GTGGGGGTGA GGGCGGCCCC TGAGATGGTG
    67681 AAACTGCAGA TCGTGATCAG TCAAATCCAT TCCGCCTGCC CGCACTAATC AAGGGTGTTC
    67741 TAAGACTCGC GTGTCCTCCA ATCAGGAAGC CAGAACCATA AAATACCCGC CGGGGTTGCT
    67801 CTCTAGAAAG CCGGACTCAG CGGCGTCTAG CTGGAGCTGA GCTGTTAGGA CTGGGTGGAC
    67861 CGCGGACCCT CCCACTGGGC GCGGTCGCGG GTCCCTGGAA GCTCCGCCCC CAGCTCGCGC
    67921 TGCAGCGCAG AGGCGGAGCT TGGGTCCACC GCGCGGACCG CGGTCCCGCA CCTTGTCCAT
    67981 CGCTTTCCGC AGGCTCCCCA CGCCCCACGC CACCTGCTGC TTGGTCTTCA TCCGTGAGCA
    68041 CCCAGCCCGT GCCCATAGGG AGGCAGATTC CAGAGCGTCT CTGGTCTCCC TGCCTGGTTG
    68101 CCTTGTGGAT GAACCCGCTC TGTGCTGCTA ACCTCAGCAT CTCGGTGTTT GGGTCTGCTT
    68161 CTTGAAGGGG AAAGACATCA AAACTGGTCC CGTAGCAACA GTAAAACCGT TACACGTAGC
    68221 GCTCACCCCT CCATCCCCCA CAGATTACTG ACCACCTGTT TCTCTTCGAA TCCCTTCAAT
    68281 AAAGAATCTT GGAGGAAGCT TCCGTCTAGC CCAGGCCTCC ATTTTCCAGA TCCCTGGAGG
    68341 GGCAGTGGGG GAAAGATTAT AATTCAAACA GAAGTCCCGG GTCCATGTAG AACCCAATCA
    68401 CCATTCGCTA CGGGGAGGAA TCCACGTAGC AGATGAGGCT GATCGTCTGG GGCGGCCTAT
    68461 ATTGAAGGTT TCATGGGAAA CTGCCTTCCA GGGACACAGC CCAGTATTTT GCCTCTGGCC
    68521 CCTCGAGACT CCGGGGCTCA CCTCCCCGCT CCACTCCCGT CCTCTGGGCT CTGATGGGGC
    68581 TTCTCCGGGC CAGGGCCCCG CATCTGCAGA CAGCCAGCAG CCCAGGGAAC AGCAGGAGGC
    68641 AGGTGGAGAC CCCAGGCCGG CCCACCCACA CTGGGTTAGA CCAGAGGGGA GGGGCCAGCC
    68701 GTGAGGACGC AGGCAGCTGT TCTGGGATGG CCTTGGGTGG GGGGGTAGCA AACGTGGGTG
    68761 AGTCTCCAGC GCTCAGCCCC ACTGGAGTCC TGGAGGCTGT GTGAGTGTGT GGCCTGTGGT
    68821 GTCGGAGACA CCCTGCTCAG CACCCCCAGA CCACCTTCTG ATTTGGTTTC CTGGTTATCA
    68881 GACACTGAAG AGGGGGTCCC CCAAAAGAAA GGGGCTGCCT TTCCCCACCC CTTACCCCCC
    68941 GAAGGTGGTG CATGTCCATG GCGCACACAT CCAGATACCT GTGATCCCAG CGAACCTCCG
    69001 CGTGGCCCCA GGAGCCGCGC AAGAGGCCAT TTGGTTTCCA CCTGGGCTGA GGTGACTGAA
    69061 CCCCCTTGTC ACCTCTGAGA AGTCCTGGCA GCTGTAGTGG GGGCTCCTGC CTCCCACTGA
    69121 ACTGTCCCCC CGACCCCGCA GCGGCCAGCT GAGCTGATCC GAGACCACTG CACCCGCGGT
    69181 AAGCTCCTGC CCTCGTGTCC CTCCTGCCAC GGGAGTGGCC AGGGCGACCC CCTTCTTGAG
    69241 GCTCTGCAGC TGTGATGGTG GCCGGCCCCC ACCACAGGAG GGCGAGGGGA GAGAGGGGGC
    69301 GGGTGAGGGG ACCATCCTGG GACAGACAGG ACGTGGGAGA GGGTCCCCGT CTCCCACGAC
    69361 TGTGTGGGCT CCCTTATGCA GGCGGCCTGA TCTGTGAGGT CTAGTTCTTT GCTGCATCTC
    69421 GTGGTATTTG CTGAAACTTT TCTAAAATGT AATCAAGCAC CACGTAGCAT TCTAGCTTAT
    69481 GTTGAACGGC CTTTGGGAGT TAGGGTAGAA AATCAAAGGA ATATTTCAAA ACGCTGACAG
    69541 TGTGAGAAAC ACCTGTGCCC TCAGTCTGCC AGGCAGGTGT GCATCCTTTA GTCCTCCAAG
    69601 CCCCATGGGG CTGGGCAGTG CCATCACACC CTCCGTGTCA CAGCCGAGGT CGCTGAAGCA
    69661 CCAGCCTGTG ACATCAGGAG TGGACTCAGG ACAGAGCCCG GCACTGACCA GACCAGGAGG
    69721 GGCAGGTGTG CCCGATGGTG GGTCTCTCGT CGGCCTAGAC AGGGCGCTCC ACACTCGGAC
    69781 AATAACTCAC AGAGATGGGG CGGGGATGAG CATGACCTTT GGGGGTTAAC CGACCCAATA
    69841 CATACTAAGC TGGAAATAAA TCATGCCTCA CTCTAAACAG CAATGTTACT CATAGGAGAA
    69901 CTTCTTATGT AAGAAGAATT ACAGAAAGAA TCAGAAAGCA AAATCCAATA ATTTGCTGTT
    69961 TATAAGTTAC AGATATATAG CAAAAATATA TACACAAATT TTAAAAATAA AATGCCGAGC
    70021 TAAATAAACT CTCATGCAAA TGCAAATTAA AAAAAAAAAA GCAAGGGGTT TCCATTATAA
    70081 TGTTTGGAAA AGAGAAGTTG AAGCTAGAAG CATTAAAAGA GGCAAAGAGG GCATGCAAAG
    70141 GCACAGGTTC TCAGTTCATC TCTGTTAAAT AGACATCTGC TCCAAATACG GTAATCACTT
    70201 GATCACGTAC ACCCTGTCTA TCGAGATAAC GGCATGACTA ACAAAGCGTA AACGGCACTC
    70261 ATAAAACAGA ATAGAAACCA AGGCAAAACA GAAACACGTC AGGGAAAAGC ACACAAAACC
    70321 AGACCGTGGT GTGACCAGGT AAACCAGCGC TCCTAACTAC CGTGGGGCCA CAGGCTTCCT
    70381 CCCGGAGCAG CCCAGCCGTG CACACACCCA CAGGGCTTTG CTGGGCGCCT GGGCCCACGA
    70441 CCCCGGACCC CGGCATGCTC ACCGGCTGCC AGGCGTCCTC ACACCTCGAA GGGAAGACAA
    70501 GTTAGAGCAA GTGCGGACTG GAGCAAAATA ACATAAAGAC TGAGGTAACA AACCGAACTG
    70561 ACAGAGTGAA AACACGTTTC TTGAGAGTAC ACAAATGCTG TATAAAACTG ATAATATATT
    70621 CAGGCTCAGA GAATGTCTAT GGACACTTAA AAATCCTGAC ACCAGCACAT AATAAGTAAC
    70681 AGCAATGACT GAAGCAGTCA TCACTGGGGT TAGGATTAGG GTTAATTTAA AAACACTAAT
    70741 TTTTAATTAT TAAAAAATAC TAATTAAAAT AATAATAATG GGGTCAAAGG GAAATTCCTA
    70801 AGAGCAAAAA AAAACCCAGA CGTCAACAGT ATAGAGCAGA AAAAGCTGTA ACTACAAGAA
    70861 AACAAACACA GACCCAAGTA CCCACGTTTA CTAGAAATGT TAAAAATTAT TAATTACCTA
    70921 AATAATTAAT CTTAGAAATG TAAAGTGTTA ATATTAAGCA ACAAAAAAGA TAAAGAAAAG
    70981 AGCAGAATAC ATGTACTTTG ACAAAACAAT TTGATTAGTA AACAGAACCA AGAACTGGAG
    71041 CTTTACGACA GTCAACAACG TCTGCTAAAA GAAGGGAAAA CTAAGACAAT AAAACAAAAT
    71101 CCGACAACGA AACTCGAGGA CAATTCAAAT GCTACCAGGA CGGCCTCTTA CAACGTCGCT
    71161 GTCTGGGAGC CCAAGTCAAA GGACTTAGAA CACATAAGAA AACAAGGAAA GAGCATGAGC
    71221 TGAAGACTAG GTTCCGCTCA CACTTCTGAA AAAAAGCACT TGCCTGGTCT GACCACGGTT
    71281 TTGTGTGAGT CTGTCAACCC TTCAGGAGAG GAGTCTTACC TGCCGTGTTA CATAAATCAG
    71341 AAAAGAAAGG GATGGGGGTG GGGGGGAGAA GGTCCGCGTT TAGAAGCTTG AGGCGAGCGT
    71401 GAAGTAGCTG GGAGGCGCGG GGCTCAGCAG GCTTGCTGGG CTTGGGGGGC GACCCAGGTT
    71461 GGCTGAAACC GGCGATTTAC GAGCAGGAGA CTCCGGAAGG GTGGTTTTAA GGAGAGTGGT
    71521 GACGTGTGCA AAGTGATGCT TGGAAAAAAA TAAAACAATT TGGCTGGGAG CACAGCGCGC
    71581 GGAGGAGACG GCAAAGGTTG GAAGTGGATG ACTGCCCTGC CCAGTAAGGA CAGTCCTGGC
    71641 CAAGGCTGAG GGGGTCCCGG GGGTGGGGCA AGGAGGTAGA TCTTAGGGGG CCCTGTCCCC
    71701 CTGCACCAAG CGGGGGTGTC AGCATTCTCT CAATTCTCAC AAGTGATGGG CGATCCTCCA
    71761 GGCGGGCTGC CACTCAGATG GGCGCACACA GGGGCTGGTT TAGTACCCCC ACGGACAGCA
    71821 GGGGCTGCAC AGAGCTGGTC TCCCCAGACC AGCAGACCTG TCCTTTCAAC GTCCCCAGCT
    71881 GCCAAGCCTG CTGATGGAGG AACAGCTCTG GCCTTCCCAT TTTTATTCAG GACCATCCTA
    71941 GCTGCCGAGC CAAGCCCCAT CTGCTGAAAT AACCAGCATG ACCCTGACGG GCTCGTAGGA
    72001 CTGCGGCCGC AGACATGTAA AACTTCAAAA TCAGTTCAGC CCACCTCCTC CCCGAGCAGT
    72061 GCTAAGGGGC CCTGCGAGGG ACAGTACCAG AGACCACCGC CAACTCCCAG AGGCCAGGGA
    72121 CAGACGCTTC TGGGGCAGCC AGATGCGGCC CTGCCCGAGC CCATTCCTGG GCCAGGGGCA
    72181 GGGGACTTAA CTGGGATGGC CACCTTCAAG CCTTGCTGGG TCACAGCGGG CAGGTGTGCA
    72241 CCTAGGCGAT GCCAGGGGGC TGCCTGGGAG CTGGCCGCCC GCCTGCTACT GGTGGGAGGA
    72301 GGAGGAGCTC TGGAAACATG GCACCCTCAG AGCCCCGCCC TGAGGATGCC CAGCTGAACT
    72361 GGCCCGGGGA ACCGGAAAGG GTCGCTGTAG CCCCAGGCAC CACACCCAGG GCACAAGCTG
    72421 GAGGGGGAGG GGCCCTGCCA TCTTGGGAAC CAGACGGGCC TGTGTCTCCC CTGCCGGGGG
    72481 GGCCGCAGCA GGAGGTGGGG TGTCACCCTG GGTCTCCGTC CTCAGTTGCC AGTTGCCAAA
    72541 GCTCGTGAGT GCCCAGTCCC AGTCTGAATG GGAGCCTTGA ACACACACAC ACACCCCCCA
    72601 GGGGAATGTG GCATTCCCAA CGTCCCCACC TCCTGGAGAG GGAAACGGAG CCTTGGGGCT
    72661 TCCTCCAGGA CACCAAGGCA GGAGGGGCCA GAGCTGGACC CTGAACCCAG CCCTTCAGAC
    72721 CGGAACCCCT TCATCCCTGG ACAGGGCGCA GGCTGCCCAG CCACAGAACG GAGGCCCCGC
    72781 AGGCGCCCCA GCCTGGACGC CGGGTCTGGC GGAGGGCTAC TCCTCGTGGC AGGGTCCTGT
    72841 GCCTGGCTGA GCCGGGCAGC GCCTCCACCT CCGCTGGAGG GCCTACAGCC AGGCCCGCCC
    72901 TCAGCCAACC CAGGCCGAGG GCTGAGAGGC GCGGGGTCCT CGCCTGCCAC CCCAAGCCCA
    72961 GGAGGAGCCC TCCTGCACCC GCTCCGCCCC ACCGCCGAGC GACCCTGCAG TGGCCAAGGT
    73021 GACCCTCGAC TTTGGACTCA TCTTCCCCGG GCTGTACGGG CTGCGAGTCC GCTTCACTTC
    73081 TTCAAGTGTC TGACGTTAGA GCTCGCCGGA CGTCTCCCGG GGGCTTAACC CCACTTCGTC
    73141 CCTCTGACGT GTATTCGTCT GCACTTTAGA AAAAGCGAAT GGAGGGCAAA ACCAACCCCC
    73201 CGGGGTCACG GCAGAGAAGA GCCGGCCGGG ATTCCGCCGT CCGGCTGGCC CCCCAGGTCC
    73261 ACCCGCTGGG CCGGGGGCGC CAGGGCCGGC GTGCCCTCGC CCCGGGCGGA CCCTAGAGCT
    73321 TGTCCGCCGC GTGGACCTTC TGGTGGCGGA GGAGGTGCGA GCTGCCCCGG AAGGCCTTGC
    73381 CGCAGCGGTT GCACTCGTAG GGCCGCTCGC GCGTGTGCGT CTTGTAGTGC TCGATGAGCG
    73441 CCGAGCGGTG GCGGAAGGCC TTGCCGCACT CGTTGCACAC GTAGGGCTTG CGGCCCGTGT
    73501 GCGTGCGCTG GTGCTGGATG AGCGCCGAGC TGTGGCGGAA GGCCTTGCCG CACTGGCCGC
    73561 ACTCGTAAGG CCTCTCGCCC GTGTGGGTGC GCTGGTGCTC GATGAGCGCC GAGCTCTGGC
    73621 TGAAGGCCTT GCCGCACTTG TGGCACCGGT AGGGCCTCTC GCCCGTGTGC GTCTTGCGGT
    73681 GCTCGATGAG GTTGGAGCTC TGGCTGAAGG CCTTGCCGCA GTCCGCGCAG GCGTACGGCT
    73741 TCTTGCCCGT GTGGACGCGC TGGTGCCGCA GCAGGTGCGA GCGGTGGCAG AAGGCCTTCC
    73801 CGCACAGCTC GCAGGCGTGC GGCCTCTGCA GCGAGTGGAT CTTGCGGTGC TGGCTCAGGC
    73861 CCGAGCTCTG GTTGAAGGCC TTGCCGCACT CCTGGCACGC GTAGGGCTTC TCCCCGGTGT
    73921 GGATGCGCTC GTGCTTGCGC AGGCTGGAGC TGCGGCTGAA GTCCTTGCCG CACTCGCGGC
    73981 AGACGTACGG CCGCCTCCCG CTGTGCGTCT TCGCGTGCTG CGCCAGGGCC GAGCTCTGCC
    74041 GGAAGGCCTT GCCGCACTCG CCGCACTCGT ACGGCTTCTC CCCGGTGTGG ATGGCCTGGT
    74101 GCCGGAGCAG GTGCGAGCTC TGGCTGAAGG CCTTGCCGCA CTCGCCGCAC TCATACGGCT
    74161 TCTCCCCGGT GTGAATCACC AGGTGCCGGA GCAGGTGCGA GCTCTGGCTG AAGGCCTTGC
    74221 CGCACTCCCG ACACGCGTAG GGCTTGGCGG GCTGCGCGGT CCTGGGCGGC CCCTGCAGCC
    74281 CCAAGTCACC CCTGCCCACC GCCTCCCTGG CAGGCGGATC GGCGGCTTCC CCGCTGCCCG
    74341 TGATCCGGTA CGCAGTCGGG TCTGGTTTCT GGAGGAAGGT CGGGCCGAAC AGCTCATCGT
    74401 CCTGGGCCCT GTCTCCCGGG GGGACGCTCT GAGGCGGAAC AGGGCTGGAG CACAGATCGA
    74461 AGTCCCCCCG GTAATCGTCC TGCTCCCTGC CTTGCTCCCC GAGAGGGATC TCCTTGTAGA
    74521 TGACGGCCAT CTGCTCCAGA GCCCTCCCCT GAAGAAAGGG GGCCCCCAGG TCCTCCTCCG
    74581 CGAACAGGTC TGCCTGCATG TCCAGCCCGC CGGCAAACAC GAAAGCCTCA CCCAGCTTGG
    74641 CGGCCGGGGG GATCTCCACA GAGGGGCCCG TCATCCCAGC GGCTGGGTCT GTCTGGGACA
    74701 CACACAGCTG CTCTCGGATT CTGAAAAGAA AACAAGAGAC ACTGTCACAT CAGCAGGTCA
    74761 AGCAGCGAGG AGCCGGACCC CAAAGCAGAT GGAACCAAGG ACACAACCTT GCCCTCGAAG
    74821 ACGGTCCTGG GTGAGTCAGA GACAAGCCAG AGACTTCCCA GAAACAAGCG CAAGGCGGAC
    74881 GCTGGTGTCC AGACTCTAGA GGCTCAGGGC ACCGGAAAGA TGGGCGAGGA CAGCAAGGGA
    74941 GCCATTCTGG AAGAGGGGCG GAGTCCGGCC CCGGAGGGTG CTGGGGCTGG GGTCTTGCTG
    75001 GGAGAGGGCA TCTGTTTGCC TCCTGTGCTC GGTGGGCGGC ACCCCTCCAG CCCGGAGCCC
    75061 CAGCCGGAAC CCAGGAGTCA GATCTTCCCA ACATCCGCCC CATCCACGTC CTGAGGGCCC
    75121 ACTGACGGGG TCTCTGCCTC TCTCCAGGCT GACTCCCGAT GGATGCCCAT CTCCAGCTCC
    75181 CCCCCCACAC ATCTGTCCTC TACGTGGACA CCAGGGTCAA ACACCTAAAC CCGGTCATGA
    75241 TGGCAGCGTC CCCCTTCTCA GGAGCCTGCA GCAGCCCACG CCCTCCATGG CCGGCCCTGC
    75301 GGCCCTGTCC CCGGCCTCTG CTTCCACACA CCCTCATGCT TCCAGCTCCA CAACTCGTAT
    75361 GAGCCGCTCT TTCCTCCGCC TGACTGGTCC CCTCACCACT GGCTTCTCAC GTGGCCACAT
    75421 GCTCATTTTT CCAGACTCAG TCCAAATGCC TCCTCTTCTC TGCACCCTCA GACCCGGACA
    75481 ATCTCGGGCA CGTGGCCCCA GTGGCCGCAG ATGCGGGACA CGCATCCATC ACAGCACTGG
    75541 GCACTCGCAG GGCAGGCGTC CTGGCAGGAC CCCCCGCAGC ACTGCCTGTG AACTCCCCGA
    75601 GGGCAGGTCC GGGGCTCCTC TGAAGTGGAA GCCCCAGCTC CCAGCACAGC CGCTCCGTCT
    75661 CTACACGCAC ACACCCACTG AATAAATAAA TGACTCAACG GAGGAAAAGC CACTTGCTTT
    75721 TGTGTCAGTA CTGCTTGCCA CACTTTTATT TTTTGCCAAA GAACTTTGTA TTCAATCAAG
    75781 TCAATTATCT CTGAGCCAAA GTTTTTCCAG TAGTCATGTA CCGATGTGGG CGTTGGATCA
    75841 TAAAGAAGGC TGAGTGCCGA AGAACTGATG CTTTTGAACT GTGGTGTTGA AGACTCTTGA
    75901 GAGTCCCTTG GACTGCAAGG AGATCAAGTC ACTCAATCCT AAAAGAAATC AACCCTGAAT
    75961 ATTCATTGGA AGGACTGATA ATGAAGCTGA AGCTCCAATA CTTGGCCACC TGAGTCAAAG
    76021 AGCTGACTCA TTGGAAAAGA CCCTGATGCT GGGAAAGACT GAGGTCAAAA GGAGAAGGGG
    76081 ACGACAGAGG ACGAGATGGT TGGACGGCAT CAGCAACTCA ATGGACAGGA GTTTGAGCAA
    76141 GCTCCGGGAG ATGGTGAAGG CAGAAGGCCT GGTGTGCTGC AGTCCATGGG GTCGGAGAGT
    76201 TGGACACGAC TGAGCGACTG AACAACAATC TAGGAGATAT AAACAAACAC AAGAGACAAA
    76261 AGCAGAGCTG CTCGGGTGGA AGGGGGTGTT CCACAGGGGA CAAGCAAGGA GCGGGGACAC
    76321 CCCACTCAGC CCCCCAACCC CATGTGGGAG CCCCCAAGGG AGCCCCGCAG GACCCCATTC
    76381 AGAAACCGTG CAAGCTCCAA GGAGACTCTT GAGGTACCAT AATGGTGACA ACTCGAGGTT
    76441 ATTGAGCATC TGCCGCGTGC AAGGCACTAC TAGGCCTTCT ACAAGCCCGT CTCATTTACT
    76501 CCTCAGGACT CCATACAAAG GCACGCTTCC CCAAACACGG AAGTTCAAAG AGGAATGGCC
    76561 TCAAGAAGAC ACGGGAAATT CATCAGGATA GTCACGGCGG AACTCATTCC CAGTTGAATC
    76621 TTCTTACTGA AATGTTTACT GGAGTCTAGC TGACTTACAA TGTTGTGTTT GGGGTTTTTA
    76681 AGTTGTACTT GATCTTTAAT TGGAGGGTAA TTACATACTG TGTTGCTTTC TGCCGTACAC
    76741 CCACATGAAT CGCCCATAGG CACACGCACG TCCCCTCCCT CTTAAGCCTC CCTCCCACCC
    76801 CTCTAGGCTG TCACAGAGCA AGGGTTGTTT TGTTTTCAGT GAATTTTCAG CCAGGTGTGA
    76861 AAAAAAGCAC AGAACTGCAG TATCCTCAAG ACGTCTAAGC TCACTCCCAT TCCTCACAAC
    76921 CCCCATCTCC ACTGCTCCCC CTCCTCAAAC TTCCCACCCC ATTTCCACCC TGGCCCACCC
    76981 CTTCCCCGTT AAGCTTAGAC CTTCTCTACT CAGGCCTTCT CCAGCGGGTC CACCGATGGG
    77041 CATCACTCCA ACCAGCTCTC TGACCAGCCT CAGGTTCCTC ACCTTCCTGC CCTGCTGCAA
    77101 CCGCCCACGA ACTACCCGCC TCCCCCGCCA GCTCCTCCTA AGATGCTGAA CGTCGCCAAG
    77161 GAAAATCATA GGCCTTGTGG CTGGCACGGA GACAGATTTC GAGTTTCCAG TTTCGGCTGG
    77221 CGCTTCAGCT CCAGTGTCCA GTGACCTCCT TGCAGCGGGC CAAGCCCTCT CTTCTGGGTC
    77281 CTCACTTCCC GCGCCCCCCC CTCCAATTCT GGCAGGCACC CCAAGACCTC CTTCTCGAAA
    77341 AACCCTCCGT TTCAGAGACT GCAAATGGGC AGCCTGGAGA CCCTGTCACA GACGCCTTGT
    77401 GCCTGGCTCT CAAAGAGTCG GGCTTTTCCT TATTGTTTGA CTCAGCTGCC ACAGTATTTA
    77461 AAACTCTAGG TTTTCTAGCG AAGAGCTGGA AGATGTGACA ATAAGGGGCC CAGCCTTCGC
    77521 TCACTCACGG GGCAGGGGGC GGCTGCTGGA TAACCAACCT CAAGCCTCGT TTCATTCCCT
    77581 TGGTTTCTGA AAGCTCCTCT CCCCACTAAT CTTCCCGCCC CACTGACCCC TCTTTCTCAG
    77641 GATCTGGGCA GTTGTGACCT CCACCCACCT GCTAAATCCT GGTTTTTCCA TTCCCCCTAG
    77701 GTGCCAGCTA CCCGCTAAAG TCTCCGCCGT GTTGAAAAAG TTGGCGACGC TTTTATCTGT
    77761 GCCCAGCAAT GTTTTCACCG ATGCTTTGGG GCTGAAATGT CCTAGGTCTG GAACCCCGTG
    77821 CTTCCCACCT CTCTCGGGCC TTCCCGGCTC CTCCGGCCTC TGTCACTCTG TCCTCCGGGG
    77881 CTCCCAGGGC CTGGGCACCG GGCCGGCCCC CGGGGCCCGT CCTCCGGGCT GGAGGCTCAC
    77941 GAGCGGCCGC GGCCCCGCAC CTGCTCCCAG CGCCGGGGGC CGCCCANNNN NNNNNNCGGG
    78001 CTGGGTACCT GTCCTGCGGG TGGGGCCGGC CGGAGGCCGA GGGGGGCGCT GGGGTCCCCG
    78061 GGAGAAGGGC AGGCGTGCCC ATCACGCCTG TTGGGATTTT CCACCCGCCG CCTTCGTGGG
    78121 GAGCCCGGGA CCCGCCTGCC CATCTCGTCC CCTCAAAGAC CGATGAGAGC CCAGGAGATG
    78181 GCTTGGCGCC TGGGCGGGAC CCTCTCATGC ATCTGATGGG TAGTCCCCCT GTTCATGTGG
    78241 CGCCTCTTAG AGGAACCGGG AGAGAAGAGA GCTGTGTTCT TCAACCCCCC CACCCCCCTC
    78301 CCAGGGCTAA GTTCTGCTTC TGGTGGCAAG CCTGCCTCTC TACCCCAGGA GGGCTGCTGC
    78361 CCATGCCTCC CCTGCCCTCT GCCCACCTGC CTTCAGGTGC CTCTGAGTGT CTGCACCCCA
    78421 CACACACACT CACACCTGCC CCCTTGCCCC ACCCAGGAGT AGGCAGGGGC TCCCGAAGAC
    78481 CCGGTCCAGT CCCCTCGTTG AGTGTTGGAA CCCAACCAGC CATGCAGAGC CGGGACCAGC
    78541 AAAGGCTGGT TCCTTTTTCT CTCACTCCAG CTCCTCCCGT CACAGGAAGG CAAGAGCCAC
    78601 CAGTCTGGGC CCCTGGGGGC TGGTGGGGAG GCTGGGCCCC ACGCCAAGGG TCTCAGGTGC
    78661 TTCCTCTTCT GCAGTAATCC CCAGGACCAT CCCTACCCCC ACACCCCGAG CCACAGGGAT
    78721 CTCATAACCC TCAGAGCAGT TATTGTTGAC ATGGTGAGTG TTATTAACCC ATTTCACAGA
    78781 GGAGGAAAAC TGAGGCTCAG AGAGAGGGTC CCAAGGTCAG GAGTAGAAGT GGCAGGCAGA
    78841 CGGAAGACAC TCATCCCACA CCCCTAGAAT AAGTCACCCA CAAAGCAGTA ATAATCGGCG
    78901 TCATCTTCGG GCTGCACGGG GCTGATGGTC AGGATGCAGG TGTTGTGGGC TGCATCCGCA
    78961 GCTGCAGAGA AGCGGTCCGG AATGCCGGGG GCCCGGTGTT GGTGCTCCTC TGAGCGGTAG
    79021 TAGAGGAGCA GGCGGGGGGC GCTGCCTGCT CGCTGCTGAT ACCAGGACAC GCCGAGGTCC
    79081 CCGACGATGG CGTAATGGGG GCTGATCGTG CAGGACAGTT GGGCCACTTG TCCTGGGAAG
    79141 ACCAGCAGTG CTTCTGGCTT GGTCAGGGCT GGCTGGGAGG CTGAGAGACA CACACTCAGG
    79201 TCTGGCCTGG GCCCCTTCCC TCCAGCCCCT GCCCCACAAA GCCTGGGTCA GACTCCCCGG
    79261 GAGAATCTGC TCCCAAAAGC TCACAGCCAG TGCTGTGGAA TCAGCACTGT GTGGGCCACA
    79321 GAGCGGGCAA CCCTTAAGCC CCGTCTTCCC AAGGAGCCAC ATGCAGCTAA GGGTCCAGAA
    79381 TTCAGAGGGT GGGCTGGTGG GCTCTGGGTC CTCCTGCTGC CCACCCTCAT CCCTTGCTCT
    79441 GCAGACCCCC ATCACTTAGG TCACTTCGGC TCGTCCAAAA CCTGGCTACA GGCTGACCAC
    79501 CCCCAAGAGG CCGCCTGGGC TGTTACTATA TCCATCGGCT CAGCCTCCGG CCACTGACTG
    79561 CTGGAGACCT CCTCAGGGAT AGCTTGTCCC TGAGGCCCTG CAGGGCAGTG ACAAGGCCAC
    79621 ACCAGCTTCC CCTCTGAAAA ACTGAGTAGG AGACCAGTCT CTGAGAGCCC CCCAGAGTCA
    79681 GAGTCCAAAG GTACCCTGGC TATCTGGTCA CTCACCAGTG GGGAAACTGA GGCCAGGTCT
    79741 CCTGTCCCCC TCAGGGCCCC TTCGGAAACC ATCCCCCCTG CCCACTACGA TTTACTTCCC
    79801 CGCGATTTAC TTCTAGAGCC CCGTGCTGTC TTACACACCC CTAGGTGAGC CAGGCCTTGG
    79861 GAGGGCTCAC CTGCCAGGAG GGCCCCGAGC AGAAAGAGGG CCAGAGGCGG GCAGGCCATG
    79921 GCCAGAGGCA GGGAGGCAGG CAGGAGTCCG CTGTTCTGCG GGCGGCGCTC CAGGTGCTTC
    79981 GGGACCTCCA CGCAAGGGAG GCCGCTGGAC CCTGACACGA CATGCAAATC GTCAGCCCCC
    80041 CCACCCTGAC AGCGGGGGAG GGCGGTGCCG TCTCCCCGTC AGCCAGTGGG CCCCGCAGGG
    80101 CCGCCTGAGG GCAGGAGCTG GAAATCCACA GGTGCAGTCA GAGCAGGTGG CTGCTTTCCA
    80161 CCGAGGTCTC CTGTGTACGG TCACATGCAC AGACCTCACA CGTGTGGCTC GAGGGTTTTA
    80221 CACACACACA CACACACACC CACACATCTC TGTAGCCTGT ACCCAGACCA AATTTTAGAA
    80281 CATCTCCATC GCCCTAGAAG GCTCCCTCAA GTGCCTCCCT GACCTGTTAC AGCCCTCCGC
    80341 ACCAATGTTA TAAAGCTCCC ACTGTGGGCC CCTCTTTATG GCACTTCTGT GACACTGCAG
    80401 ACAAAAGACT CCCTCCTCGG CGGCTCGAAA GACAAAAACC CCTTGACAAA CAGGGGTGGT
    80461 GGCTGGAGCC AAGGGTGCAG GCCGGAATCT GGGCACAGCC GCTCCCGACC GTGCTGCAGG
    80521 ACTCGGGTCC CCAGACACAG TGGTGTCCTG GGAAGAAAGC ACTGGCCTGT GCGTCTGGGG
    80581 AATGCTGCCC GGGGCCACCT CTGAGCACCT GCTGCCATCG AAGTGCGTCC TCCAGGTGGG
    80641 GCTTCAGCCG GTGCTCCTTG CCCTTTCTCC AGCTATGAAT GCCGAGGGAA GCAGAGCAAC
    80701 GCTGGTGGGC TGCGCTGGGA TCTGGGCCTC CTCCCGCCTC CGGCGCTGAG CTCTGCCCCC
    80761 AGAAGGGCAC AGATGGCCTG ACCACCTGGG GGGGAGGGCC GCTGAGAAGG AGGTCTCCTG
    80821 AGTCCAGACG CACAGAGGGG CCGTGACATG GTGCAGCACA CTGGAGAACA CGGCAGCTTC
    80881 TTAGAAACAG AAGCATACTC TCCCCGGACG GTCCGGCACC CCACTCCCAG GATCTGCCCT
    80941 CAGGAAAGAG AAATAAATGC CTGTTCACCC AGAGACCTGC TGGCGAGTGT CTGTACTGGC
    81001 CTCTTCATCA TCACCCCATG CGGGAAACAA CCCAAAGAGC AGGCAGCGAG CGGATCCACG
    81061 GCACCTCCAG GCAAGGGGAC CCTCCTGGCG TGAGAGGAAG GGGCCACCGA CACGGGGACG
    81121 ACCCCTGTGG ACCCCACACG CAGGAGTGCA AGGCCCTGCC CCGTCGGCCG CCTCCCTCTT
    81181 CGTGACAGCC TGGCTGGGAG TTTGGGGGGA CGAGGGACAT GTTCTGTATC CTTAGTGTGG
    81241 AGAACACTCC GAAGAGTGGC TGTGAACTGT ATGCCAATCA TACTTCAACA AGAGCAGGGG
    81301 ACAGAAGACG GGGAGGCCGG GAGTGCGCCT GGGAAGGGGG CCTGCAGAGT TGAGGATGCT
    81361 CCCCCTCCAG GAACCTCCGA CTCCCCGCCT GGGAGCTCTG TCTCTCCTTG CGGGCGGCGG
    81421 CGGTGGGAGG GCACTGGTCT CTGGACAGCT CTGGGCCCGA GGCTCCAGCC CCCACTAGAG
    81481 CCCTGCACCG GGAATGCCCG GACCCTCCAC AAACCCCGTT ACCCGGATAC TGGCCGCTCA
    81541 GACCTCTTGG CAGCTCCCAC TGCCACAGAG ACCAGCTTGG AAGCTGGGTG GGGGGGCAGG
    81601 GGAGGGAACC TCAGTCTTCC CTGATCCAGT GAGGGGGAGA AGGCTGAGGA TCCTGGACTA
    81661 GCTGCAGGGA CCGCCTGGAC TGAGCAAGGA GCTCCGCTTG AGCCCACCCA CCCATCACCC
    81721 TCTCCACCCG TACACCTCCC ACAGGGCCCC ACCCTGCAGT CGAGCTCCAC CCCAGCTCCT
    81781 TCCCCAGGTC GGAAGTTGGG GGTCGGAGGG ATCTGTCCCC ACCACGGCCA TGTTTATCAA
    81841 GGTGATGTTC GGAGGTAAGT GGGGTCCCCT GTCCTAGCAG ACAGGTGGGG GTGCGTTCCC
    81901 TCTGCCTTGG AGGGGGAGAA CGAGGAGGCG GTGTGGGGAA GGGGGTGTCC ATGGGATGAC
    81961 ATCCATGGGG AGTTGCTTGA GGGAAACAGG CGGGCTCTTC TGGGCCACAC AGCTGCTGTG
    82021 CCGCTGCTGG GGGAGCGTGT GTTCCAACTG TCCCATCTCT TCGCTGGTCA GGGGTCCTGC
    82081 AGCTTCGGGG AGGGGGGGCG GGGAACCTGA GCTTCTGGTG GAGGCGGGGC TGCATGGTGG
    82141 AGGCAAGAGT CCTTCAGATG TCTGGGGAGA TGGGCGGGAG GAAGGCAGAG CATCCTGGTC
    82201 TGGGGGGAAG GCGGGTGCCA TGCGCCCACC TCTGCCCCTC TCCCACAGCC AGCTGCTGGG
    82261 AGCTGGTGAA CACCTGGTGT GGCCTTGGGA CCCTCACCGC CCACCTGAGG CAGAGCGGCC
    82321 AGGTGCCCCC TGACGGTGAG GGGGGGCAGC AAGGGTGCTG GAGGACCGGC TGAGGGCCCC
    82381 CCCGCCCCAG CGGGGGTCGT ACCAGCCCTG CCCTGCCTCC CTCTCCGCCC TCCCAGCGAG
    82441 CGTCGCCCTG CTGGCTGAGG ATGGGCACCT GGTGAGCCTC GCCGAGGGGC TGGAGGAGGG
    82501 GCCTTCCCCA GCGCCCTCCG TGGCCAGCCC CCCGCTGCAG GAGGGGGGAC CTATGTCCTG
    82561 ATGCAGATCA TCAGTAAGTG GGGTCCAAGA TTTGCGCCCC CCTGCAGTGA CGTTGGAATA
    82621 TAAGAAGAGA CAGGGGCACC CATGCCCTGC AGAGCCCCCA GCCTGGCCAG GACCCAGCCC
    82681 TGTCCTTCCC ATCCAATGCC CTGTCCTGAG CCCAGGCGGG GGTAGTAAAC ACGTCCAGAG
    82741 TCGGGGGGGC GGGTACGGAC CACCAGCCTC CCAGTGATCA GACTCCCTCC CTCCACAGAG
    82801 GGGGAGGGAG GGGACCCCAC CCGCTATGAG TGCCTCCTGG AGAACCCGGA TGGGTGGCAT
    82861 CCAGAGCTGG CTGGTGAGTG TCACTCACAC AGGAGAGCCT GGGGGCAGGG GCACCTGCCC
    82921 ACCCGCACCC TCAGGCAGGG TTTCCCGGGC CTCACAGAGG AGCCGCGCTG GCGTCGGGCC
    82981 TGCTCCCTCA GGGCGACGGC CGGAGGCGGC GCCTGGGCCC TCGGCGTGGC CTCCAGAAGC
    83041 AAGGTCCCCC TCCACAGCCC CGAGGGGTGG GCTCCCTGCT GTCCAGGACC CAGGAGCCGG
    83101 GGCCTTGAGC CAGGTAAGGA GGAGACACGG ACCCCAGGGG GCTGCTCGCA CCCAGAAATG
    83161 GGACCCCCTT CCCAGGGGAC AGATGTTTGT GCTGAGAGGT GGACCGCAAT GCCAGCCTCC
    83221 CTCAGAGACA CACGTAAAGC CACGTGACGG GACACAGTGT ACCCGAGGGC AGGTCCCCAC
    83281 CAGCCCTGGG GGCTCGGTGA CTGGGGAACG TGGAATAGGG CCTGGTACAC AGTGGGCGCT
    83341 CTGTGCGTAG ACACTGAGTG AACTCAGCGG AGGCAGCAGC TCCGAGTGCT CGACGGCACT
    83401 GAAGGGCCTG CTCCTCTGTG CCGGCAGGCC CTGTGACCTG GAACGTCACG GCCAAGCGGC
    83461 CGAGCTGGAC TGAGATCCAA GGGGGCTGGC CGTGACCTCT GCTCATGCGG TCAGGTGCAA
    83521 AGGCCCGAAG CATTCCTCCT GCTGAATCTG CAATTACGGG GAAATTGCAT CAGCAAGAGG
    83581 GGCAAGGTGA CCGACAGAGC GTGAGGCCAC CGAGGGGCCC CCAGAGACGA GAAGGAGGCG
    83641 GCACGCTCCT CCAGGGTCTC CAGCTGGCCG GAGTCGGACG CCCTTGAGGC TTGAGGTCAG
    83701 CAGTTAGTGC CTCACCATCC GGTCTGCGCT GCCCGTCGGA TTACGCAGGA TGACAAGGTC
    83761 ACCCTCCCCA CAGGGGGCAG CAGCTGAAGG GGTGGCACCC CACCCCGCAG TGGGACTTCC
    83821 ATCTCCCTCC CCCCCGCCCC CCGCAGACAG TCCAACAAGA GGAGACACAG CAGGTTCGGC
    83881 TAAAATAAAG GCTTTTAATT GCACGTTTTC ATCTCAGGTC ATCTGTGGGG TGAGGGACCC
    83941 CCTCCTCACT CTGGGTCCCA GCTCGGTGGG TACAATCTGA CGTCATGGTC CGGCTGTCGG
    84001 TGGGAGGGGG GTGCAGGTGG GTGCAGGGCT GGCCACCCAA TCTGCTCTGG TCTCTTAGGG
    84061 CAGGGAGCTC AGACCTGTAG AGGGAGGAGG TCAGGCCGAA GGTACAGGAG CCGCCGGGAG
    84121 GAGCAGGAGC ACCAGGGAGA AGTGGGAGCA CCTGGGAGGC AAAGGAGCAG CCAGGAGGAG
    84181 AGGGAGCACC AGGGAGAATC GGGAGCACAT GGGAAGTGCA GGAGCACCTG GGAATAGCGG
    84241 GAGCACCCCG AAGGAGTGGG AGCCGTGGAC CGCCCTTCCC ACCCTGGCGC CAGTCGGGCA
    84301 GCAGCCGCTC ACCGTGGTTG TACTTGCACT GCTTCAGGGC CTCGCTGAAG CCCTCACACA
    84361 GGGTCAGGTC GCTCTGGGTG GTGGAGCAGT CCAGGAACTG CCTGATCTCA TAGGCACAGG
    84421 GCCCCATCTG CAGGGGCTGC GGGGCGGCGC GCTCCGGGCC CTGGGGCACA GCGTGGGAGG
    84481 CAGCCGGATC AGCTCGGGCT GGGCACCCGG GAGAGGACTC CAAAGCTGGG GGTGGCGGCT
    84541 GCCCCTCCGC AGAGCCCCCG GCCCTGGTGC CTCAGGGGTC CCTAGCGGGC AGTGTGCCCC
    84601 AGGTCTTAGC GGCTCCATCC CTGAAATAGG GTGAGCCCAC AGCCCTCTCG AAGCCCCTGC
    84661 CGCTGCTGGT GGGGTGCGGG AACAGGGGCA GGTGGGGCAG GAGGCGGGAC ATGGGTCTAG
    84721 AAAAGCCCAG GGCAGTGCTG GTATGAACTC CAGGCCGACA GGTTCTAACA CCTTCCTGGC
    84781 TCAGCCACAT TGATCCTCAT GATCCCTGAC CCCGTCACTA AGCCCAAATG TGGCTCAGGA
    84841 CTGGTGGGGT GCCCAGTGGG GTACAGGTCG GCAGGCCCAA AGTCACTGAC TACCAGTCAC
    84901 CCTTGGGCTC AGGAAGGGGC CTCCCGGGGG GTGGGAGAGC GGGCACTCAG GAACTCCAAC
    84961 AGCCCTCCCT TCTACTAGGG TTGGGCGACC TAGGGCTATC TCTGACCCCT AAGCACCTTG
    85021 GTTTCCCCAT ATTTAAAGGG CTGGTTGGTG TCTGCCCACG GGGTTCTAGG GACCTTGGCC
    85081 TCAGGGGATG GGTTGGGAGA GCCCGCCTGT GATGACCCCA GGCCAACAGC CGAGTGACCA
    85141 GTAGGATCCT TCTTGCTGCG GCTCTGTGTC GGGCCTCAGT TTCCCCTGAG CCCTTGCTCA
    85201 CCTGCTGGGC CGCAGGCTGG GCGGGCTCTG AGCTCCCCCC ACTGAAGGCT CCGGTCAGAG
    85261 CGCTGCCCAC GACGTGGCCC ACAGCCGAGC CCACGGCCAC TCCGGCGGCG GTGGTCGCCA
    85321 TCTGCGCCAT CAGGCCGGGC TGGCCCGACG GGGCGGGGGC CGGGGCCGCG GCCGAGGGCG
    85381 GCGGGTGCGC AGGCGGGTGC GCGGCAGAGG GCGCGGCGGG GCGGCTGCGG GATGCGGGGA
    85441 GAGGCGGGGT CATTCCCGGC CGGACCCCAG GCCGGGACTC TAGAGAATCC CCGGTACCGG
    85501 CTCNNNNNNN NNNGATGGCG CGGCCGTCAC CAAGGTCACG CCGCCGCGTC CTTGCGGGGC
    85561 CGCGCTTCCC CCGCGCCCGC CCCCAGCGCC CGTGCCGGCT CCTACCTGGG TGGCCGCGAG
    85621 GCCACACTGC GGCTCCCCCG GGGCATGGCG GCGGCGGCGG CGCGGCGGGG CCGGACGACC
    85681 CGAGTCGGAA ACGGCGACCG CGGCGCTGGC TGTGGCTCAG GGACGGCGGC GGCGGCGCCG
    85741 GTCCCCGCCG GCGGGGCCGG GCCGGGGCGG GACTGCGGAG ACACGCCCCC GGCGGGAGGC
    85801 CCGGGGCCCG GTCACGCGGC ACCCCCGCGG GTCCCTGGCT TCTCCTTCGG CAGCTCCGGG
    85861 GGTCGGTGAG CCTGCGCCCT CCGGGCCGCC GGCCCGAGCT GTGTGCGCCC TGGAGAATCG
    85921 GAGCCGCTGT GGCAGCACGC GGAGGGCGCG CGCAAGGGCC ACGGGACGGA CCTTCAAAGG
    85981 CCGCGGCGGA GCGCGGCAAG CCGAACCGAG GGCGGTCTGG CGATCGGCCG AGCCCTGCTC
    86041 CCCCCTCCCG CGTGGCCCCA GGGTCGCGGG TGGACTGGGG CGGGTACAAA GCACTCACCC
    86101 CCGTCCCGCC CCCAGAAAGC CTCCCAGGAC TCTCACAGAG CACCCGCCAG GAGGCATCCG
    86161 GTTCCCCCCT CGGCTCAGTT CAGTTGCTCA GTCGTGTCCA ACTCTTTGCG ACCCCATGGA
    86221 CTGCAGCACC CCAAGCTTCC CTGTCCATCA CCAACTCCCG GAGTTTACTC AAACTCATCT
    86281 ATTGAGTCAG TGATGCCATC CAACCGTCTC ATCCTCTGTT GTCCCCTTCT CCTCCCACTT
    86341 TCAATCTTTC CCAGCATCAG GGTCTTTTCT TATGAGCCAG TTCTTCACAT CAGGTGGTCA
    86401 GAGTATTGGA GTTTCAGCTT CAGCATCAGT CCTTCCAATG AACACTCAGG ACTGATTTCC
    86461 TTTAGGATGG ACTGGCTGGA TGCAGCGCCA GACACCGACC GCGTTTACCC CGTGTGTCCT
    86521 TTCCAATGGC TGTCCCCTGC GGGCCTAGGG GCATTGGTGC GGGTTTGAAT CCTGTGGCCT
    86581 TGAATTTTAC GCCTTAGTTC CAGGTCCAGG GCAGGGCCAT CCGGATTCAG GATGCTTCCC
    86641 AGCCCTTCAG GAATGGCAGG TTTTCATGGT CCTTTCTGAG TGAGTTCTGA GTGGTCATAT
    86701 TGGTGCCCTT GGCAGGGAGG GCTCCTGACT TTCCTATCTT CACATCACTG TCCCCAACCC
    86761 CCAAGAGAGG CCTCTTGGCC CAGGGACTGC AGGGAGGATG AAGTCAGGAG CAGAAGCATG
    86821 GGGTAGGGGG CTCAGGTGGG CAGAGGAGGC CCCTCTGTGA GGAGGAACGG CAAGCGAGGA
    86881 GGGAACAGGG GCACCGGCAG TGCCTGGCAA GCTGGGTGAT GTCACGACTA CGTCCCGACC
    86941 ACACAGTCCT CTCAGCCAGC CCGAGAAGCA GGGCCCTCCC CTGACCCCCA TCTGGGCCTG
    87001 GGCTTCAGTT TTCTCCTCCC TGCAATGGGG TGACTGTTTG CCTCCAGGAG AGGGGAGCAT
    87061 GTAAAGGTGG CCACTCTCTT CTGGCAGACA TGCCAGGCCT GGGCCAGCCT CCACCCCTTT
    87121 GCTCCTGCAG CCCCTGCTGA CCTGCTCCTG TTTGCCACAC CGGCCCCTCC TGGGCTGATC
    87181 AGGGCCCCCC TCCTGCAGGA AGCCCTCTGG GACAAGCCCA GCTTGGTGTA ACTGTGGCTT
    87241 TCCACTGTGA CCTGCAACGT GGGAGGCTGT TACTTAAAAC TCCCATGACT GGTGGATTGC
    87301 CGGTCCCCAG AACAAGGCCA CGCATCCCTG GAGGCCCTCG AGACCATTTA AGGTAGTTAA
    87361 ACATTTTTAC TTTATGCATT TTCATGTGTA TCAGAAAGAA AAAAAATGTA TCATCAGTTC
    87421 ATCAAATCCA TGATTTCTTG ACCAATATTG CTAAGATGAG GCTGAAATAG GCATTTCCAT
    87481 TTTTAAAAAA CTGAATCACT CTGAAGAAAC AGATGGCAGG CTTCCCTGGT GGTCCGGTGG
    87541 TTAACAGTCC ATGCTTCCAG TGCTGGGGGC ATGGGTTCGA TCCCTGAAAA TTTTAAAAAG
    87601 GAAGAAAAAG ATGGCTCCCC CGTCCCTGGG ATTCTCCAGG CAAGAACACT GGAGTGGGTT
    87661 GCCATTTCCT TCTCCAGTGC ATGAAAGGGA AAAGGGAAAG TGAAGTCGCT CAGTCGTGTG
    87721 CGACTCTTAG CAACCCCATG GACTGCAGCC TACCAGACTC CTCCGTCCAT GGGATTTTCC
    87781 AGGCAAGAGT ACTGGAGTGG GGTGCCATTG CCTTCTCCAG GCAAACGGCC TGCTACTGCT
    87841 ACTGCTGCTA AATCGCTTCA GTCGTGTCCA ACTCTGTGCG ACCCCATAGA CGGCAGCCCA
    87901 CCAGGCTCCC CCGTCCCTGG GATTCTCCAG GCAAGAACAC TGGAGTGGGG TGCCATTGCC
    87961 TTCAGCCTGC TGCTGCTGCT GCTAAGTCGC TTCAGTCGTG TCCGACTCTG TGTGACCGCA
    88021 TAGACGGCAG CCCACCAGGC TCCCCCGTCC CTGGGATTCT CCAGGCAAGA ACACTGGAGT
    88081 GGGTTGCCAT TTCCTTCTCC AATGCATGAA AGTGAAAAGT TAAAGTGAAA TTGCTCAGTC
    88141 GTGTCCGACT CTTAGTGACC CAATGGACTG CAGCCTACCA GGGTCCTCCA TCCATGGGAT
    88201 TTTCCAGGCA AGAGTACTGG AGTGGGGTGC CATTCGGCCT AGGGAGTGAG AAATCACGGC
    88261 TGTCTTCCCT CTTCTCGCCC TCTAGGGGTC TCTGTGGAGC CTCCCTGGAG AGGCCGCGGC
    88321 GGCTCCGGGG ACTGGAGGGG GAGGGGGGGT TGAGTCAGCC GGTGGCCCTC CCCTCGCTGC
    88381 CCGTCTCCTC CCTTTTTAGG CACAAGCTGG GCGCCCTTTT TAGGCGCAGC CTCACCCTGC
    88441 GGGCCACTGC CCGTGTTTCG GCTCCCCGGA GATAAAACAG ATTGCCTGCA CCCCGGGTCA
    88501 TCACAAGGAT TGTATGACCG TTTCCCAGTG TGCTCACCAC CCTCCCTCTG ATTCTCAGAG
    88561 ACGCGCCCTC GCCTCAGGAG GCTGCTCATC CCAGGCCAAG GGGCGGCGTG GGGTCCCCAG
    88621 CGCCCCGCAC AGACACTGCC TTCTGACCAC CTCCTCCCAA CAGCTTACCT GCCAAGAAGG
    88681 CCTCCTGACC CCTCATCCTG CCCGGTGGTT TGGAGAAAGC CTCATCTGGC CCCTCCTTCT
    88741 CGGGGCCTCA GTTTCCCCCT CTGTGAACTG GCGGATTCTG CCAAGCTGAC GTCCTGGCCA
    88801 GCCGCCTCCC CGTGGCCAGT GTCCCCCGGG ACACAGCTGA ATGTCCCTGC TCGGGATGCA
    88861 CCTTCCCAAG TTGGCCTGTC AGGAGGCGGG GGCGAGCAGG GAAACCCGAC TCCTCTCAGA
    88921 CGGCCCATCG CATTGGGGAC GCTGAGGCCC GGAGCAGCGG CACCCTCCTG GCCAGGGTCA
    88981 TTCTCCCGCC CCGCCCCGTC CCTCCGGGCC TCCGAGACCG CAGCCCGGCC CGCCCCGGGA
    89041 AGGACCGGAT CCGCGGGCCG GGCCACCCCC CTTCCCTGGC CGCGGGCGCG GGGCGAGTGC
    89101 AGAACAAAAG CGGACCTCAG GCATGCATCT ACNNNNNNNN NNGTGATGCT GAGGTGTCTC
    89161 AGCCCCCGCC CGCCCGCCCT CAGCCGAGGG GCGCCGGTCG CAGAGCTGGA TCAAGGGGGT
    89221 GCCCGGGAGT GGCCCGGCGC GGCCCGTTAC CCCGAAACGC TGTCTGGGTG CCCCGGGGGT
    89281 GTGGTGGATA GTGAGCTTCC CGTCCCTGGA AGTATGCAAG TGAAGCCGGC GCCGGGATCG
    89341 CTCGGGCTGG CTGGTGAGCG GGCGGGACTC GGTCGGGCGC TAGACGCACG CCGCCAGCCC
    89401 CCCAGCTCCC AGACCTGCCC ACTCCGCGCC CGCCCGGCCG CGATCCCGGG TGTGTGTGTG
    89461 TGTTGCAGGG GAGGGACAGC GGGAGTGGCT ACAGGGCTCC CGACTCACCG CAGGGACAAA
    89521 GACCCGCGGG TCCCCAGCTG GCGTCAGCCG CCAGGTGTGT GGCCTCGGTG AGCACACCTC
    89581 CAGGCGGGAG GGTTGAGGGA AGCGCTGTGG GGAGGGCATG CGGGGTCTGA GCCTGGAAGA
    89641 GACGGATGCT ACCGCCTGGG ACCTGTGAGT GGCGGGATTG GGAGGCTATG GAATCAGGAG
    89701 GCAGCCTAAG CGTGAGAGCT CCGGTGTGGC CTGGCGGGGG TGGTAGGGGG GGGACGCCCC
    89761 TGTGTGTGCC AGCCTGCGTG TGCCCTAAAG GCTGCGCCCT CCCCCACTGC TGGGGCTTCG
    89821 GGGGACCAGT CACAGCCTAG GCTACTGCAG GCGCACAGCT CCCCGGGAGC CCGGCCCACG
    89881 CGGGTGTGCC GCTGAGCCTC CAGCCTGTCG GGGCAGGGGT GGGGGGCAGG GATGGGGTCG
    89941 TTAGCGGGGT TGGGGGCAGA CGCCCAGGCA GACTCTCTGG GCACAGCTCC GGTGACAAGG
    90001 GAGGTCTGGC AAGCCTGGGC CCCTTCTGTC CAGCCACGCC AGCTCTGCCC TGGCCAGTCT
    90061 TGCCCCCTGG CAGTGCTGGG GATGGAAGGG GGAGCGGGTA CCTCAGTCTG GGGGCCCTGC
    90121 CTCCTCCCCA GCCCCGCCCG GCCCCCTAGG CCTAGGGGCA GAGTCTAGGG GTCACCCTGG
    90181 GGAGCTGCTG AATCCGCGGG TTTAGGAACC GGAGGGACCT GGGCTTTTGA ACCACGTGGC
    90241 CCTAGGTGAG CCCTCCGGCG CCTCGGTAGC CCTCACCCCC AGCCTTGTCC AGGTGGGCGG
    90301 GTGGGAGGCG ACAGTGCCCA CTGCTGGGCT GAACAGCGTC TGCAGGGAGG CCAGGAGAGC
    90361 TGGGCACACG GACACGTTCC ATCACCTGGA GCTGCCACTG TGCCACTTGT GCGGGGTCAG
    90421 GCGGGGTCTG AGCCGGGCTG TCATCTGTCA CGCCACAGAT ATGCAGGGGG CACTCGGGGT
    90481 CGCCTCGGAC ATGCTTATCC CTGGACGGCT GTTGGCAGGG CCGGGAAGGC TCTGTAAATA
    90541 TTTATCCATC CCAGCTCACA GCTTTCAGGG TTGATGAAAG CCCCGCCGCC CGCCCACTGT
    90601 GGGGGACCCC GCCTTCCCTT CTGGAGCCAG CGGGGTGAGG GGGTGGGGGA GATGGACCTG
    90661 CCTGCCCAGG AGCAGGCGGT GTGACTCTGG CAGGTCACTT GACCTCTCTG AGCCTCAGGG
    90721 AGGGCCCGGG ATGGTGTGCG GATGCTCTCT GCCTTCCTCC CAGCCTGACC AGTGTCCTCC
    90781 CCTCGGGGTC GCCTCCTGCC CACCGCAGAG GGGGTGGCTA TGGGGACCTG GGCCGATGGC
    90841 AGGCAGGCCG GAGAGGGCAT GCCCGGCTCA GCCGTGCCCA GCACTTCCCA GTCCAGGGGC
    90901 CCCCGCCACT CCCAGCCGCT GGCTGCCTCC CATTTTCCCG ATTGCAGGTT GGCCCCGAGG
    90961 CTGACCGGAG CCTCTGGCTC AGCTGGGAGA CTGAATTCCC CAAGCAATTC CTCAAGGATG
    91021 TGTGAGGCTG TGGTGTGGTG CCTATCCGGG AGAGGTGGGG TGAGCGGACT GGGCACCTCC
    91081 GCCCAGGGCA GGCCCAGGGA GATGCTGGCT GACGAGCAGG CAGGCCTGCA AGGAGGACGA
    91141 GCAGCCATCT CAGGAATGTG GGTTTTGGAG ACAAGCCACA GCTGGGGGGG TGGGGGGGCC
    91201 ATGGGTGGGG AGGCCTGATC CCCAGGTCTA GGTCCAGCTC TGGGCTCCCT CGCCGTGTGA
    91261 CCCTGGGCCA AGACCTGGAC CTCTCTGGGC CCCGTCTCTT CCCCTGGGAG GTGGGGCGAT
    91321 GCCTGCTCCC CAATCCCCCA GGGCTGTGGA TGAGGCAGAC GAGGTGTGTG CTCATCCCCA
    91381 CCTCACTGCC TTCCAGCAGC CCCGGGCGGG GGGGGGTGGT GGGGACTGGC GCACCCAGGT
    91441 GAGGATCAGG CCTTGGAGCT AGGGAGGGCC CCCCAGCCCC AGGCCAGAAA GGACACGGGG
    91501 AGACAGAATG CAGGAGGGCG GCAGAGCAGG GGCCAGCGGT GGGGAAACTG AGGCCAAGAG
    91561 CCTGTGGACG ATGTGCTCCA GGAAAGGACC TCGCTGCCTG GGGCCCGGAT CCTAGAGCCT
    91621 CCAGGAGCGG TGACCATGAC GTGGGCAGGG AACCGGAGGC CCCGGCTTGC AGGTGGACCC
    91681 GGCGCGAGTC ACTCTTCCTC TCTGGCCCTG AGAGCTTCCT TCCAGCTGCC GCTCCTGTGT
    91741 TCTAATGTCA AGTCTGGAGG CCTGGGGGGC AGGTGGGGGC TGACTGCCAG GTGGGGGAGG
    91801 GAAGGAATTT GGCAGAGCAG CGTCCCAGAG TGGGAGAAGC CAGCCCATGG AGGGGACTCT
    91861 CTCCATGCCT GCTGCCCCAA AGGGCGTTAT AGAGAGAGGT CGGTTACCCC TTCGCCATGG
    91921 CCCCGTTCCC ATTGAACAGA TGGGAAAGTG GAGGCTGAGA GAAGGCTGTG ACTTGCCCAG
    91981 GGTCTCCGTG GCATGGAACT GGGCCTGCTG AGTCTCAGGC CGGGGATCTC GCTGCTGCAC
    92041 TGAGCACGCC AGGATGCAGG GGTCTGGGCC TGGACCTAGC GCCTCGTGGG GGCAAGAGAG
    92101 GAAGGCACGC TGGGCCTGCC TGTCACCCTC CACCCCACCG TGGCTTGTTG CTCAGGCCTT
    92161 CCTGGGGGCA GAGGAGAGGG GAGATTTCAC TCGCTGGCAG GCTAGGCCCT GGGCTCTCTG
    92221 GGGCTCCGGG GGAACAATGC AGCCCTGGTC TTTCTGAGGA GGGTCCTTGG ACCTCCACCA
    92281 GGGTTGAGGA AAGGATTTCT GTTCCTCCTG GAGGTCACGG AGCCGACATG GGGAGGAGCA
    92341 GGGGCAGGCC CGGGGCCCAC ATCCTCAGTG TGAGACCTGG ACGTGTGTCC TCCCACCTGA
    92401 CGCTGGGGGT GGGGGGTGGG GGCCGGGGGG GATCCAGTGA ACCCTGCCCC CAAATTGTCT
    92461 GGAAGACAGC GGGTACTTGG TCATTTCCCC TTCCTCCTCT TCGTTTGCCC TGGTGGGGAC
    92521 AGTCCCTCCC CTGGGGAAGG GGGACCCCAG CCTGAAGAAC AGAGCAGAGC TGGGGTCAGG
    92581 GGTGTGCTGG GAGCGCAGAG AGCCTCCTGC TCTGCCTGCT GGTCATTCCT GGTGGCTCTG
    92641 GAGTCGGCAG CTGGTGGGGA GCGGCTGGGG TGCTCGTCTG AGCTCTGGGG TGCCCAGGGC
    92701 CTGGGAGAGT TGCCAGAGGC TGAGGCCGAG GGTGGGGCCC TGGCGGCCCG GCTCCTGCCC
    92761 CAAATATGGC TCGGGAAGGC CACAGCGGCA CTGAGCAGAC AGGCCGGGCC AGACGGGCGC
    92821 TGAGGCTCCC GGCCTCTCCC CCAGCTCCGC TGTGACCCTC ACCTGCGGCC CGGGGTGCCA
    92881 GGGCCCCCGC TTGGTTCTGC CGTGTCTTTG CAGGCTGATC CCACGGGCTC TCCCTGCCTC
    92941 TCTGAGCTTC CGCCTTTTCC AGGCAGGGGA ACCGCGACCT CCAGGCTGGG ACGCGGGGAG
    93001 GGTGTATGCG CCAGGTCAGA ATCACCCCTC CACCGGGAGA GCGTGGTCCA GGGGCCCTGG
    93061 CAGGGTGGGG ACCGAGCATC TGGGAACTGC CAGCCACCCC CACCCATGCA GAGGGGACAT
    93121 ACAGACCACA CGGAGGCTGT GCCTCCGCTG CAGCAACTGG AGAACACCCA GCCGCGGCCA
    93181 AACATAAATA ACTAAATAAT AAAAGTTTTA AAGATCGTTA CTTAAAAAAA CAAGTGTGCC
    93241 CCAGTGATCG GACCCCAGTT CCCGGTGCCC TGAGTGGTGC CGGCCCTGTG CTGAGCATGG
    93301 CCTGGTTGGT TCACCCCCAG ATCCACACTA AAGGGTGGGA TCACCCCTAC TAGTCAGGTG
    93361 AGCAGATGCA GGGGGGGAGG GCGGCAGCCC CTCCATGCTG GTGGGTGGCC GTGGTGGGTG
    93421 TCCTGGGCAG GAGCCAGCTC ACGGAGCTGG AGAGGACAGA CCTGGGGGGT TGGGGGCGCC
    93481 CAGGAAGAAA CGCAGGGGGA GAGGTGTCTG CCGGGGGTGG GGGTCCCTTC GAGGCTGTGC
    93541 GTGAAGAGGG CAGGCGGGCC TGCAGCCCCA CCTACCCGTC CCCGGCCCAA ACGGCGGGAG
    93601 TAAGTGACCC TGGGCACCTG GGGCCCTCCA GGAGGGGGCG GGAGGCCTTG GGATCAGCAT
    93661 CTGGACGCCA GTCAGCCCGC GCCAGAGCGC CATGCTCCCC GACGGCCTCC GCTGGAGTGA
    93721 GGCTGCGCTG ACACCCACAC CGCTGACCCG GGCCTCTCTC CCGCTCAGGA TGCCCCCCGC
    93781 CGCCACCCCG TGAGCAGAGG GCCACAGCCC TGGCCCGACG CCCCTCCCGA CAGTGACGCC
    93841 CCCGCCCTGG CCACCCAGGA GGCCCTCCCG CTTGCTGGCC GCCCCAGACC TCCCCGCTGC
    93901 GGCGTGCCTG ACCTGCCCGA TGGGCCGAGT GCCCGCAACC GACAGAAGCG GTTCGTGCTG
    93961 TCGGGCGGGC GCTGGGAGAA GACGGACCTC ACCTACAGGT AGGGCCAGTG GCCACGAGCT
    94021 GGCCTTTGAT CTCCACCTGC TGTCTGAGAC ACGCTGGAGC TGGGGGGAGG GCAGATCCCT
    94081 ATGGCCAACA GGCTGGAGTG TCCCCCAACT CCCGTGCCCA CTGCTCAACA CCCCAAACCC
    94141 ACACTTAGAT GCACTCCCAT GCCCTCCCTT GGGAGCACGG TCTCCACACC CACCTGGCCA
    94201 CCCCACACAC CCGTGGGGCA CGGCCGTTAG TCACCCACGC AACCTCTGCG GGCACCGTGC
    94261 TGCGGGCCAG GCCCTGGGAC TCTCAGTGAG GGAGGCAGAC ACGGCCCCTC CTCCGGGGGA
    94321 GCGAGGTGCT CCCCACGCCC GGTTCAGCTC TAGCACCGCA CTCGGGACCC TCACAGGGAG
    94381 GGACCCACTG GGGCAGGCCA GGTGACGGCT CGGGTGACCT CGGCCCCTGG CGCTGAGACT
    94441 ACACTTCCTG CAGTGGGCGG CGAAGATGGG TGTGGTGTCC CACGTCGTTG CAGCGGGGAC
    94501 TCCTGGGGCC TCGGAAGTGT CCTGGGCGGG GAGCCTGGGG AGCAGGAAGG GCAGGTCTTG
    94561 GGGTCCAAGG CCTCCCCACG GTCAGGTCTG GGAGGGGGCC TCGGGGCTCT TGGGTCCTTT
    94621 CCGCCCAGTG CAGACCCTCG CGGCCACCTA AGGGCACACA GACCACACAA AGCTGTGCCC
    94681 ATGCAGTGTG GGGAGTGGTG CGCACCCTCA GAGCACACTG GGCCCACATC ACGCACGCCT
    94741 GCCCCCTCAC TGTGCATCCG GGGAAACTCC TGGCCCCGAC AGCCAGCGGG GCTGACGCTA
    94801 CCCCGTGAGC CAGACCCAGG CCCCCCTCAC CGCCCCTGTC CTCCCCAGGA TCCTCCGGTT
    94861 CCCATGGCAG CTGCTGCGGG AACAGGTGCG GCAGACGGTG GCGGAGGCCC TCCAGGTGTG
    94921 GAGCGATGTC ACACCGCTCA CCTTCACCGA GGTGCACGAG GGCCGCGCCG ACATCGTGAT
    94981 CGACTTCACC AGGTGAGCGG GGGCCTGAGG GCACCCCCAC CCTGGGAAGG AAACCCATCT
    95041 GCCGGCAGCC ACTGACTCTG CCCCTACCCA CCCCCCGACA GGTACTGGCA CGGGGACAAT
    95101 CTGCCCTTTG ATGGACCTGG GGGCATCCTG GCCCACGCCT TCTTCCCCAA GACCCACCGA
    95161 GAAGGGGATG TCCACTTCGA CTATGATGAG ACCTGGACCA TCGGGGACAA CCAGGGTAGG
    95221 GGCTGGGGCC CCACTTTCCG GAGGGGCCCT GTCGAGGCCC CGGAGCCGGG CCCGGGCTCT
    95281 GCGTCCGCTG GGGAGCTCGC GCATTGCCGG GCTGTCTCCC TCTTCCAGGC ACGGATCTCC
    95341 TGCAGGTGGC GGCACACGAG TTTGGCCACG TGCTCGGGCT GCAGCACACG ACAGCTGCGA
    95401 AGGCCCTGAT GTCCCCCTTC TACACCTTCC GCTACCCACT GAGCCTCAGC CCAGACGACC
    95461 GCAGGGGCAT CCAGCAGCTG TACGGCCGGC CTCAGCTAGC TCCCACGTCC AGGCCTCCGG
    95521 ACCTGGGCCC TGGCACCGGG GCGGACACCA ACGAGATCGC GCCGCTGGAG GTGAGGCCCT
    95581 GCTCCCCCTG CCCACGGCTG CCTCTGCAGC TCCAACATGG GCTCCTCCTA ACCCTTCGCT
    95641 CTCACCCCAG CCGGACGCCC CACCGGATGC CTGCCAGGTC TCCTTTGACG CAGCCGCCAC
    95701 CATCCGTGGC GAGCTCTTCT TCTTCAAGGC AGGCTTTGTG TGGCGGCTGC GCGGGGGCCG
    95761 GCTGCAGCCT GGCTACCCTG CGCTGGCCTC TCGCCACTGG CAGGGGCTGC CCAGCCCTGT
    95821 GGATGCAGCC TTCGAGGACG CCCAGGGCCA CATCTGGTTC TTCCAAGGTG AGTGGGAGCC
    95881 GGGTCACACT CAGGAGACTG CAGGGAGCCA GGAACGTCAT GGCCAAGGGT AGGGACAGAC
    95941 AGACGTGATG AGCAGATGGA CAGACGGAGG GGGTCCCGGA GTTTTGGGGC CCAGGAAGAG
    96001 CGTGACTCAC TCCTCTGGGC ACAGCTGGGA GGCTTCCTGG AGGAGGCGGT TCTCGAAGCG
    96061 GGAGTAGGAT AAAAGGTATT GCACCCCATG AAGCACGTGT GATCCTTGCC CCTAGAGACA
    96121 AGGCTCTGGG GCTCAGAGGT GGTGAAGTGA CCCACATGAG GGCACAGCTT GGAGAATGTC
    96181 GGGAGGGATG TGAGCTCAGT GTGCCAGAGA TGGGAGCCTG GAGCATGCCA AGGGGCAGGG
    96241 CCTGCTGCCT GAGAGCTGGC ACTGGGGTGG GCAGCCAAGT GCAGGGATGG AGCGGGCGCC
    96301 CAGGTGGCCT CTTTGCTGCT CAGAACGACC TTTCCCATGT ATACCTCCCA GCGCCGCTGG
    96361 CATTGCCCAG TGTCCTTCTT GGGGGCAGGA GTACCAAGCA GGCATTATTA CTGGCCTTTT
    96421 GTGTTTTATG GACAACGAAA CTGAGGCTGG GAAGGTCCGA GGTGGTGTTG GTGGCGGAAG
    96481 GTGGCCGCTG GGCAGCCCTG TTGCAGCACA CACCCCCCAC CCACCGTTTC TCCAACAGGA
    96541 GCTCAGTACT GGGTGTATGA CGGTGAGAAG CCGGTCCTGG GCCCCGCGCC CCTCTCCGAG
    96601 CTGGGCCTGC AGGGGTCCCC GATCCATGCC GCCCTGGTGT GGGGCTCCGA GAAGAACAAG
    96661 ATCTACTTCT TCCGAAGTGG GGACTACTGG CGCTTCCAGC CCAGCGCCCG CCGCGTGGAC
    96721 AGCCCTGTGC CGCGCCGGGT CACCGACTGG CGAGGGGTGC CCTCGGAGAT CGACGCGGCC
    96781 TTCCAGGATG CTGAAGGTGT GCAGGGGGCA GGCCTCTGCC CAGCCCCCTC CCATTCCGCC
    96841 CCTCCTCCTG CCAAGGACTG TGCTAACTCC CTGTGCTCCA TCTTTGTGGC TGTGGGCACC
    96901 AGGCACGGCA TGGAGACTGA GGCCCGTGCC CAGGTCCCTT GGATGTGGCT AGTGAAATCA
    96961 GTCCGAGGCT CCAGCCTCTG TCAGGCTGGG TGGCAGCTCA GACCAGACCC TGAGGGCAGG
    97021 CAGAAGGGCT CGCCCAAGGG TAGAAAGACC CTGGGGCTTC CTTGGTGGCT CAGACAGTAA
    97081 AGCGTCTGCC TGCAATGCGG GAGACCTGGA TTCGATCCCT GGGTCAGGGA GATCCCCTGG
    97141 AGAAGGAAAT GGCAATGCCC TCCGGTACTG TTGCCTGGAA AATTCCATGG ACAGAGCAGC
    97201 CTGGAAGCTC CATGGGGTCG CGAAGAGTCA GACACAATGG AGCGACTTCA CTGTCTTAAG
    97261 GGCCACCTGA GGTCCTCAGG TTTCAAGGAA CCCAGCAGTG GCCAAGGCCT GTGCCCATCC
    97321 CTCTGTCCAC TTACCAGGCC CTGACCCTCC TGTCTCCTCA GGCTTCGCCT ACTTCCTGCG
    97381 TGGCCGCCTC TACTGGAAGT TTGACCCCGT GAAGGTGAAA GCCCTGGAGG GCTTCCCCCG
    97441 GCTCGTGGGC CCCGACTTCT TCAGCTGTAC TGAGGCTGCC AACACTTTCC GCTGATCACC
    97501 GCCTGGCTGT CCTCAGGCCC TGACACCTCC ACACAGGAGA CCGTGGCCGT GCCTGTGGCT
    97561 GTAGGTACCA GGCAGGGCAC GGAGTCGCGG CTGCTATGGG GGCAAGGCAG GGCGCTGCCA
    97621 CCAGGACTGC AGGGAGGGCC ACGCGGGTCG TGGCCACTGC CAGCGACTGT CTGAGACTGG
    97681 GCAGGGGGGC TCTGGCATGG AGGCTGAGGG TGGTCTTGGG CTGGCTCCAC GCAGCCTGTG
    97741 CAGGTCACAT GGAACCCAGC TGCCCATGGT CTCCATCCAC ACCCCTCAGG GTCGGGCCTC
    97801 AGCAGGGCTG GGGGAGCTGG AGCCCTCACC GTCCTCGCTG TGGGGTCCCA TAGGGGGCTG
    97861 GCACGTGGGT GTCAGGGTCC TGCGCCTCCT GCCTCCCACA GGGGTTGGCT CTGCGTAGGT
    97921 GCTGCCTTCC AGTTTGGTGG TTCTGGAGAC CTATTCCCCA AGATCCTGGC CAAAAGGCCA
    97981 GGTCAGCTGG TGGGGGTGCT TCCTGCCAGA GACCCTGCAC CCTGGGGGCC CCAGCATACC
    98041 TCAGTCCTAT CACGGGTCAG ATCCTCCAAA GCCATGTAAA TGTGTACAGT GTGTATAAAG
    98101 CTGTTTTGTT TTTCATTTTT TAACCGACTG TCATTAAACA CGGTCGTTTT CTACCTGCCT
    98161 GCTGGGGTGT CTCTGTGAGT GCAAGGCCAG TATAGGGTGG AACTGGACCA GGGAGTTGGG
    98221 AGGCTTGGCT GGGGACCCGC TCAGTCCCCT GGTCCTCAGG GCTGGGTGTT GGTTCAGGGC
    98281 TCCCCCTGCT CCATCTCATC CTGCTTGAAT GCCTACAGTG GCTTCACAGT CTGCTCCCCA
    98341 TCTCCCCAGC GGCCTCTCAG ACCGTCGTCC ACCAAGTGCT GCTCACGTTT TCCGATCCAG
    98401 CCACTGTCAG GACACAGAAC CGAACTCAAG GTTACTGTGG CTGACTCCTC ACTCTCTGGG
    98461 GTCTACTTGC CTGCCACCCT CAGAGAGCCA AGGATCCGCC TGTGATGCAG GAGTGAGTGA
    98521 AGTCGCTCAG CCGAGTCCGA CTCTTTGCAA CCCCATAGGA CTGTAGCCTA CCAGGCTCCT
    98581 CTGTCTATGG GATTTTTCAG GCAAGAGTGC TGGAGTGGGT TGCCATTTCC TTCTCCAGGG
    98641 GATCTTCCCA ACCCTGGTCT CCCGCATAGC AGGCAGACTC TTTACTGTCT GAGCCACCAG
    98701 GCAATGCAGG AGACCTAGGT TCAGTCTCTG GGTGGGGAAG ATCCCCTGGA GAAGGGAATG
    98761 ACAACCTGCT TCAGTATTCT TGATTGGGGA ATCCCATGGA CAAAGGAGCC TGGAGGCCTA
    98821 CAGCCCATAG GGTGCAAAGA GACACGACTG AGCAAGTCAC ACACACAGAG CCCTACGTGG
    98881 ATGCTCATAG CGGCACCTCA TAGCTGCCAT GTATCAGGTG TTGGCATGGG CAGCCATCAG
    98941 CAGGGGGCCA TTTCTGACCC ACTGCCTTGT TCCACCGGAT ACACGGGTGC CTTCCTGTGT
    99001 GTCGGGCCCA CTCGGCTGTC AGCGCCCAAG GGCAGGGCTG TCGGGAGGCA CAGGGCACAG
    99061 AGTTAAGGAG GGGATGGGGA CGTTAGCTCC TCCCCAGCTC TCAGCGGATG CAGCAGGCAA
    99121 AACAAACGCT AGGAATCCTG CCAAACCCGG TAGTCTCTGC CCATGCTCGC CCCATCCCCA
    99181 GAGCCACAAG AACGGGAGCT GGGGGGTGGC CCGGAGCTGG GATACTGGTC CCTGGGCCCG
    99241 CCCATGTGCT CGGCCGCACA GCGTCCTCCG GGCGGGGAAA CTGAGGCACG GGCGCCTCCG
    99301 GCTTCCTCCC CGCCTTCCGG GCCTCGCCTC GTTCCTCCTC ACCAGGGCAG TATTCCAGCC
    99361 CCGGCTGTGA GACGGAGAAG GGCGCCGTTC GAGTCAGGGC CGCGGCTGTT ATTTCTGCCG
    99421 GTGAGCGGCC TTCCCTGGTA CCTCCACTTG AGAGGCGGCC GGGAAGGCCG AGAAACGGGC
    99481 CGAGGCTCCT TTAAGGGGCC CGTGGGGGCG CGCCCGGCCC TTTTGTCCGG GTGGCGGCGG
    99541 CGGCGACGCG CGCGTCAGCG TCAACGCCCG CGCCTGCGCA CTGAGGGCGG CCTGCTTGTC
    99601 GTCTGCGGCG GCGGCGGCGG CGGCGGCGGC GGCGGCGGCG AAGCCCAGCG GCGGCGCGAG
    99661 CGACCCCGGC CCGGCCCGCC CTTCGCCTCC CGAGTCGGCT TCCCCGGGCT AGGAGCGTCC
    99721 CCGGCCCCGC CTCGGCCCTT CCGATCCTCG CAGCCCGGCC GTGGCCGCCC GCTTCTGCCG
    99781 CCGCAATGAT GATGATGGCG CTGAGCAAGA CCTTCGGGCA GAAGCCCGTC AAGTTCCAGC
    99841 TGGAAGATGA CGGCGAGTTC TACATGATCG GCTCTGAGGT AGCCCGCGGC GCGTCCTTGC
    99901 CTTCCGGGCC TCCCGGCCGG CCCGGTTCCC GCGGGAGCCT CGGGGCGGGT CTGCGCGCCG
    99961 GGAACGCGCG TCTCCATTCA TCGCGGAGGG CCTGCGTGCG CGTGCGCGGC CGGGGAGCAC
   100021 CGGGGGCGTG GCCTGTTGGG GCGTGGCCGA GCAGCCCCCG CCCCGGCCGT CTGGGCACGA
   100081 CCATCCTTGT CCTTGGGCGT GGCCTATCGG GGCGTGGCGG AGAAGGCCCC GCCCCGCGTC
   100141 CGGCAGTTTG GGGACGCTTA CCCGTGTCCC GGCAGCGGGG ATGCGCCGCG CGGCCAGGGT
   100201 CCCGGGGGTC GCGGTGGCCC CGGGTCCGCG CTGAGTTCCA CAACTCCAGC CGGACGTACA
   100261 GAAACGGGGT GTTGGGTTAT CCCTTGCTGC GCACGGGGCG AGGTGTTGGA TCCCTCGCAC
   100321 GCTCCCTCCC TCATTGCCCC AGCTGGAATC CTGAAACCGC TGATTGGAAA CACCGAGCTT
   100381 AGTGGGGACT CACCCGCTTG GTGTTCTTTG ACTTTGAGGT GGGCGGGTGG GCGTTCTGAC
   100441 CTTCCATTAT CAGCGAGAAG ACAGGTTGGG AGAACAATGC TTGATTTTTG GATGGCTAGG
   100501 GCCCAGCCGT CCCTGAGCTA GATCCATCAG CAAATGGGAG GCACCTGGCA CTTCGGATAT
   100561 CTCGGACTAA CTCTGAGTTA GTGCAAGTAA ACGAGCCCAG AACCCCTTCA TCCTTACCTA
   100621 AAAGGTGACC TTTCGGCACT CTATTGAATC AGCTGGTGAC TGACTGTCAC TGGCAGCATG
   100681 CACCAAGTAT ATTAAGTTCT TCCAGTGTCC CTCAACCTTT GGCAGTCTCT GGCTTGTGCT
   100741 GTGTCCACAC ACACATTTTT AAATTACAAA TCCGCAGTTC GGGTGTGCAA GTACTGAGCA
   100801 GCAGTGCCTC CCTTTTGTAG CGAGGCGAGT GTGGGTCTTG GGGAGTCAAA GCAGTTACAA
   100861 ACGCCAATGC TTGCTTCTCC TAGCAACAGT TTTCAGTATT ACACATTTCA CTCTTTCTTT
   100921 TTTTTTTTTT TTACAATTTT TCCCCCTCTT TATGATTGAA TACACTGAAT AAATTAAGCC
   100981 TCATGATGGT CACACTAGAT GAGGCTATTG GGATTCCCTG TGACTCCCTG TGGTTTGTCT
   101041 GACTTGTATT GAGTTATGAG ACCCGTGCTG TCAGTCGCAT CAGAACTTTG TGTGTTTCCT
   101101 TTCCTCACCC GTGTTCATGA AACACGGGGC CGGATGCAAT GTATTTTCAC ATCATCACAG
   101161 AAACGCTCCC CTTGACAGCT GGCCGTACTG AAGAGAGGTG CCGCTGCCTG CCACATGCCG
   101221 TAGCTCAGAA AGGTCTTCGC CAGCCTGTGG GCACAGAGGC GGCATGTGGT GACTGGCAGA
   101281 TTGATTAAAG AAACCTTCAC CCAATCTAAT GGGCAGGAAA AGTGGTCGGT TTAGCATTGG
   101341 CTCTGAGTCG GTGGTACTTT TGAAAATCAA GCCTGCGTTT ACTGGGTGGA ACGCGGTGCC
   101401 AGGTGGGCAG AACGCGAGGA GCTCTGGCTC CAGCTTGGCG TCCACAGCTC TTGTCTCAGG
   101461 CATCTGATGA GATGCTTAGG CCAGACAGTT TCTGCGACTT GCCCTGTAGC ACACCTTAGA
   101521 TTTGAGAAAG ATAGCTGCAG TCTTCTGTTT CAGCCCTGGT GAGTGAGAAG ATTTGTCCTG
   101581 AGATGCAGTT TATGGAGACC AGACGGCAGG AGGGAGAGGC AGTTGCCGTC CGGGGCCTGA
   101641 TTTTACAATG TTCAGACCTC AGGAGGCCTG GGCAGGGTTC AGAGCTAGAC TGGCGTCCAC
   101701 TCACAGCCAG CAGCTCCTCT GACGGCAGTG GTGCTTGGCT CCCGGGCCGG TTGCCCCGGG
   101761 CAGACGGCAG GCGCTGGTTT CCAGGAGGTG CGCTGAGCAG AGCGTGCCCA CAGCGCCCCA
   101821 CACCACTCGG GGGTAGCAGC CTTGGGAGGG TGTCCGCAGC TGCCCCAGTC CTGCCCCCCC
   101881 CGATGGGCAG CCGTCATCAC CATGCAGAGG CACAGCTGAG AGGAGCCCAG GGAGCTTCCA
   101941 TACCCACACC TTCGTTTTCC ATTTGGGAAA CCTGGGTCCA GAGGGGGCAA AAGCTGGTGC
   102001 AGGGAAAACC CAGGGGGGCA GACCGAGTCC CCTAAGTTCC GAAGGGACCT CGGGAAGGGC
   102061 CTGGGAGGCT GGGAGGCCTG CAGGACCTGC ACGGTGGTAG TGGGGGCATC CGGGTCAGTG
   102121 TCTTGTCAAA AACGTCCTGG AAACTGTGTT TACCCCCTGA TGGTAACCAC GCTCAAGCCA
   102181 GATAACTCGC CCTGCCCCTG CGGCAAGGTG CAGGAGGGAC CTTGTGGCCA CGTCTCTCAT
   102241 GCTGTTCAGC AGCCCTGATT ATGTAAACCT CTAAATCCAT GAAAAATGCA GAAACTGTCA
   102301 CAAAGAAAAC TCCTATAATG GGGTAGGTAC GTGGGAAATA GCAGAAGTGG GTCCCTCGTG
   102361 GGGTGAACTT TACAGCTGAT GAACATTTGT CAAGAGGCGT AGGGAGGCCG AGAAGGGGGC
   102421 AGTGTTGCCT GGTCACAGAA GGAGCCAGCA CCCAGTCCAG CCACGGTCCC CTGCCACGTG
   102481 ATCGAGTGGT TGTTTCTGAA AAGTTGGCGG AAGAGTGGAG TTTCTTTGTA AAAACGTTAG
   102541 GACTAGATTT GTTTTCGTCA AGTAAGTAGT ACTTTGAGTA ACTGGCACAG GCAGGCTATT
   102601 GTTTGGGGCA GTGATGATGT ATGCAGCAGT CTAGTGATTG CTGATAAGCG CTTTTGAAAC
   102661 TCTTTGGAAA ATTCCTTTGG TATTTCTGGT TTGAGTTTCG TTACTAAACA AAGCAGCAAG
   102721 GGCTACGGGG GAAATTATCC TACATCTGTC TGAAATTAAA AGCCCTTCTT GGTATTTATT
   102781 ACATCGTAAA AATATCAAAG TCTTAAGATA AAAGGAAGAG AGGCCTTACA TTTTTGGACC
   102841 GCGCCAGAGA TCTTTAGTGC AAAGTCAGAG CTTCTCGGGC AGCTCCGGGG GGGCCGTGTC
   102901 TCACCAGTGT CTGCGTGGCC CTTCCTGAAC TTGGTGCTGT CGTCGGGAGG CAGAGCTTAC
   102961 CCCCTGCCAG TGGGCCAGGT GCGGGCCAGA CCTTCGCTGC TGCGGAACCC CTGATGTCAG
   103021 CAGATCGGGC TTTGCCTGCT TTCAGAGCCC GGCGCCTGCA GGCCGCGCGT GGTCTGCGTG
   103081 TCACTGAGGT GGCAGAGCCT CTGCGCCAGG GCCCTGCCCT TCCCCGAGGA GCCCCGGCCC
   103141 TCGTAATGAG CCTTCTCGCT TTACCCCTAG GTGGGAAACT ACCTCCGTAT GTTCCGAGGT
   103201 TCTCTGTACA AGAGATACCC CTCGCTCTGG AGGCGACTAG CCACTGTGGA AGAGAGGAAG
   103261 AAAATAGTTG CATCGTCACA TGGTAAAAAA ACAAAACCTA ACGCTAAGGG TGCGTCTTCA
   103321 CGAGGGTTTG TAAACCTGTT TCAAAACCAC TCGCTTATGT CATGAAGATA AAACGTTTTC
   103381 ACCCCGGCGC GTCTTCACGG CAGTCCTGAC CTTAGCGTGG CGGAGCGTCC CCGGGGTGGG
   103441 GGTAGGCTCC CCGGTGCGGG TGGGGGTCCG CGGTCAGGGC GGGAGGAGGG CCGGGCGGGG
   103501 CGCGCGCGCG GTGAAGATGC ACCGGTCTGA AAACGTTTTA GGATTGCTGT GATGCTGTGC
   103561 CATCCGCGGG CGTGCGCCAT CCTCACCCTC CATGCGCCCG GGCGGTGGGG CGGCCCGGCC
   103621 CCACCCCGCT CCGGGCTTCA CCGCTTCGCT CCCGCCCCTC CCCGTCCCCG CCCCCAATCC
   103681 ATCGCGTGGC ACCTGGTCTG GCAGCCGGTC CGCTAGCGCT CGCTCTGTGC TCTGTGCATG
   103741 TTTGCTCCGT GCTGTGTGCG CCTGGGGCCA CCGGGCCGTG TGTGTGTGTG TGTGTGTGTG
   103801 TGTGTGTGTG TGTGTGTGTG GGTGTGTGTG TGTGGGTGTG TGTGGGTGTG TGTGGGTGTG
   103861 TGTGGGGGTG TGTGTGTGTG TGTGTGTGTG TGGTGGGTGT GTGTGTGGTG GGTGTGTGTG
   103921 TGGTGGGTGT GTGTGTGCGC GTGCACTCCG CAGTCCGTCC GGTATGAGTG TGTCCCGGGC
   103981 CGTGTGTGTG TGTGTGTGGT GTGTGTGTGT GTGTGCGCGC GCGTGCACTC CGCAGTCCGT
   104041 CCGGTATGAG TGTGTCCGTG GCGCTGTCGT GGTCTGTCCA CCGCGTTCTT TTAACGCAGG
   104101 AGCCGGAGCC TCTTGTCCAC ACACTGCTGT GACCTTTCAG CCCCTCCCTG GCCCTCCTGC
   104161 GCCGGGTGCA GTGCCGGTCA CTAACCCTGC GCCCCTAGCT GCGCTTGCCC CTGGCGAGCC
   104221 TTGGCGACCC CGGGCCTCGC GCTCCCTGGG GAGCCGCCTT CCCCTAACCC TCCGTCTCCA
   104281 CCCGGCTCCC TAGGCAAGCT GTGGTCGGAT TGCCGAGAAC TCGGGCTCCC AGCGCCGCTG
   104341 GCACCGGGGC CAGGAGTTCA TGTTGCGTGT GCAGCAGCTC TTTCCAACTC TCTGGGCTCT
   104401 TGTTTTAAAA GAAAAGTGTT TCTCATCCCT CATCCCATCT CCACCTCGCT TCGTGTTGTG
   104461 GACTGCAGCG GTGTCAGACC TCTTCCCGCC GGCCGGCTCA CTCTGGAGCC CTCCTGTCCC
   104521 AAGAGGCCCT GTGGCTGGAG CCTGTGCGGA CGGCCCAGCA GGGCCTCTGG AGAAAGCCAG
   104581 GGTCCAGGCC GGCCCTTTGG AAGAGGCCCA CATCGGGCAG TCGTGAGGTC CACAGCCGCT
   104641 TCCCCCACCT CCTGCATGTG AGGACCTCGG TGTGCTGCGT CTCCTGGCTG CTCCTGCCTG
   104701 CTGCCCGCCC GCGGGCTGAC CGCAGCCCCG TCTCTGGTTG CAGATCATGG ATACACGACC
   104761 CTGGCCACCA GCGTGACCCT GCTGAAAGCC TCCGAGGTGG AGGAGATCCT GGACGGCAAC
   104821 GATGAGAAGT ACAAGGCCGT GTCCATCAGC ACCGAGCCCC CCACCTACCT CAGGTACCCC
   104881 GGCCCCTGCT GTGCTCACAG GCCTTCTTCA TCAGGTTTCC AAGTGTCTGT CTTTGGAATT
   104941 TCTGGAAACG TAAGCCAAGC CCTGGGTTCT GGAGAGTTGT TAAGAATGCT TTGAAAGGCA
   105001 GAACAACGAG TGGCCTAGGT TCACTCCCAA AAGAAACACA CAACGGTTTT GAACATAGAA
   105061 ACTTAGGTCC TTTGAAAGCA CATTTACATT CCCAGTTGAA CAGGCGAGGG TCGTGGGGAC
   105121 GTTGCTGCTT GTGGGTAGTG TTCCTTCATT CACTTAGCAG CAAAACTTGG ACACGCTAAT
   105181 AGATAAGTAG ATAAAGGGTT TAGAGCAGAC ACACAGGGGG AACGGTGTTT GTCCTTCGGT
   105241 ATCATTTCTA AATTGCAGAG TAAAAATAGA CATAGCCGGG AGCATAAAGA AGCAGGGAGG
   105301 GAGGGAGGGA GGGAGGGAGC TGGGCCGCTC TGCACCATGG GTGCCCTGCG CCAGGCGCCG
   105361 TGGCGGCCTT GGCCTCGTTT GGATCTCCGG CCCATTCGTC TCAGCCCCGG GAAGCACTTT
   105421 ACACCTCAAC GAGGGCCATC CTGAACCCAG AGACGCCCTT GGTGTTGTGG GAGAGTCCTG
   105481 CCTGGGGGAG GCGGGTGGCA GCGAGAGCTG GGGCTGCATC TGTGTGCTGG GCAGGCAGAC
   105541 CGGCAGCGAG CCCGGGCCAC GCGAGCGAGG CAGGCAGCGG GCCTGCTGGC ATCTTCAGCT
   105601 CTCTGGGCAC GAGACCTGGG GCACTGGTGG TGGGGGAGGA GGGGGAGGGG GCGGCCGTGT
   105661 GGACAGTCCC CTTCCAGGTT TTCTCCCAAC TGCACCATCG GATTGTTTTT CTAGCCACCC
   105721 CCCCCCCCCC GCCCCCACAA CCTCCCGAAG AAGGTGGTGT GCTCACGGCC TGGCCCATTG
   105781 TGGATGTGAG CGCTGGAGAT GGCTTTTCTC GCCCTGGTGG TGCGGTGAGG ATGGCAGGAT
   105841 AGCCGGGCTT CCCTAGAGAA GTTACCGGAG GAGATTACAT GCACGTGGAT GGGGCTTTGA
   105901 GATCCTCATG CAGCAGCCGA GAACCCTGTG TGGGGCCGTG AACGCTCCTG GTTGAGTCCA
   105961 TCACACGAGG GAGAGAGCTA GGCCAGTAGC CTCCTGTTAC TGGGCAGTGA GAACTGCTGT
   106021 GTGGAGGTGG GGCTGCAGGA AAGCCACCAG TGGGCTCCAC TCTTAGGAGG CGCCTGCCCA
   106081 GCGCCCAGCC AGCCCCCCAG GAGGGGTGGC ACACCCCCTC TCCCACACCG GCCAGGTCGG
   106141 ACAGGGGCTG GATGGCCCCC AGGGCTCTTG GACAGACCTC TCTGCAGCGG AAGGGAGGCT
   106201 GAGTGGTGGG ACTCGGATGC CCGGACCCCG CGTGGCGCTG CCCGTCCCAC TCACGTGCTG
   106261 CAACGTGACT CGCATTGTCC ACTTGAGGCC ATCAGGCAGG AGGGGTCGAC CGGGCAGCCT
   106321 CGGCCTGGAT ACGAGAGGCT ACTGCAAGGT GGCGGGGTGG GGCTGGCCTG GGGGGACCTG
   106381 GGTGACAGCT CCGGCTGGAG ACTCAGTGGG GAAAGGTGTG GTGGTCCACG CCCATGCGGC
   106441 CCGCACAGGC CCAGCAAGCC AGTTTTGCCC GTGGAAGTTA CAAAGGATCT GACCTTGTAG
   106501 GCCCTCCCTG GGGACGGGAG GCGCCTGATC TGAGTGGGGC ACCTTTTCCC TCTTGGCCTG
   106561 CAGGCCCGGA GTAGAAACTG CCAGCCAGAT GGCCTGTGGT GGGGACCCCG TCTCACCGCC
   106621 TCAGTTCTTG GTCCTGCCCG CATCAGCCCC AGTCCCCCGT TTCCCCAGGT CTCGGGTATC
   106681 AGGGCAGGGC AGCAGATTTG GGGGGGTCCT GGCTCCCCTT GGTGTGTGGA TCCCTCCCTG
   106741 CCCCACCCCA AGGGGCGCTC CTGGGCCCGG GCACTGGGGT GCGAGGGGCC CCCGCTGCAG
   106801 AAGAGGAGTG AAAAGGCCAA GGCCTCTCCC TCTGCCCCCC ATCCTGGAAG GGCGCTGTTT
   106861 TAGCGGGAAA CCGGGCAGTG GTCAGGTTCT CCAGGGGGTG GACGTCACCG ATGGTGACAG
   106921 CTGTGGGGCA GGGCTGCAGA GGTGTGTCGT GCAGTCACCG CACTGATTGC CCCCTTGGCC
   106981 ACCAGGGATG TGGCCCAGGG GTGACGAGCA GTCTCACAAA CGGACAGCCC GGCCCGGGAG
   107041 CCTCAGCTCA AAACGGCCTT CGGTATTTTC CTCGTAGTAA ACGCCCCATG TAAATTGGAG
   107101 AGAAGGGCTC CCCACTGTGG GACGCGAGTT CCTTGAGTTA CTTTGAGTCC CGCTTTCTAG
   107161 AGTATCTTTC CATCCCTGAA GGCCCGGAGG CCAGAGGCAT TACCTGTCTC AGGCTGGACC
   107221 AAGCGTCTGA AATAACAGCC TGATCGAAAG TGTGCAAACC CCCAGGGACT CCCAGCCACC
   107281 TGCTGAGGGC ACCCCCCCGA ATCGGGACCC TCTCTGTGTC TCCAGCCCTG GCCCCCTGCC
   107341 CAACCATTGA CCTGAGCCTC CTCTCTGCTG CCCTCGGGGC TCTCCTGGAA ATCTGCGCGC
   107401 CACCCCCCCG TGAACCCTGA CCCTCTTTCC TGAGTGCCCA GCCCAGCACA TAGCACGGGT
   107461 GACAGCTCAC AGACTGGGCT GGGGCCCCTG CCCTCTCCTC CTCCCCTAAA ACTGGTGACC
   107521 CCGAGCAGGT GCCGCTTGGA GCCTGGGGGT GACAGCTCAC AGACTGGGCT GGGGCCCCTG
   107581 CCCTCTCCTC CTCCCCTAAA ACTGGTGACC CCGAGCAGGT GCCGCTTGGA GCCTGGGGGT
   107641 GACAGCTCAC AGACTGGGCT GGGGCCCCTG CCCTCTCCTC CTCCCCTAAA ACTGGTGACC
   107701 CCGAGCAGGT GCCGCTTGGA GCCTGGGGAA TAACCACCGC GGAGCTGGGC GCACAGAGGT
   107761 CCCCATGGGG GCCTGGGCCC AGAGGGGCAT GGCGGGCGTC CACTGGCCAC AACCTGGCGG
   107821 CTGGGGGGCG GCTTTTGGCC CATAGGCTGA GCGGACGGGC GTCTGTGTCT CCCAGGGAAC
   107881 AGAAGGCCAA GAGGAACAGC CAGTGGGTGC CCACCCTGCC CAACAGCTCG CACCACCTGG
   107941 ACGCCGTGCC CTGCTCCACC ACCATCAACA GGAACCGCAT GGGCCGCGAC AAGAAGCGGA
   108001 CCTTCCCGCT CTGGTGAGGG GCCTCGGCCA CCGGGCCTCC CGCCTGCGGG CTGCTACCCA
   108061 TTGTTCATCA TTGGCGCCCC TGCGTTCTTG GAAAGTGGTT CTCGCCCCCG GGTCTAAGCG
   108121 GGGCGTGCCT GGTTTCCTTG CCCCCCGCAG CCCCCGTCTC TTCCCTCTTC CCCATCCTAA
   108181 AGGGCAGGTG TGAGTGCGGA GCTGCCTTGC TCTCCGTCCT CTGGGGCTCC CTCGGGGTCC
   108241 AGGCTGCAGG TGGGGAGCCC TGGGTGCTTG GCCACCGAGG CTCCCCAGCA CCCCCCAGCC
   108301 GCCCAGCCCC CCTTCACTGC TCTCCAAGCA GCTCCTCAAC CCTCCTGCCC CTCGGCCTTT
   108361 GTTCCAGGGT TTCTTCTTCT GGACATACCC TTTCTTCCCC ACAGCTGCTG GGAGAATCCT
   108421 GCCTGCTCTG GGGCTTAAAC CTCTCTTCCT GCAGGGAACC TCTGAGCTTG TCCCGCTGCC
   108481 GAGTCGGCAG CTCCCCTCCC GCCCCGCGTG GACCCCCGCC AGCCCTGTTT CTGCCGGCCC
   108541 GGCCCGTAGT GGACAGGTCC TCTCTGGGCA GGTCTCAGCG ACCAGTGGTG CAGAGAGGGA
   108601 GGCCCTGGGC ACAGGGGCCC AGCCCGCTTT GCTGAGCACG CGGCCGCTCC CCTTCCAGCT
   108661 TCGACGACCA CGACCCAGCC GTGATCCACG AGAACGCGTC CCAGCCCGAG GTGCTGGTCC
   108721 CCATCCGACT GGACATGGAG ATTGACGGGC AGAAGCTGCG GGATGCCTTT ACCTGGAACA
   108781 TGAATGGTCC GTCCGCCGCC CTGGCTGGCG TGCACTCAGC TCTGTCTGCG TGCTGCCAGG
   108841 GGGTCCTGTC GTCACCCGGG GGGGCGGTGG CAGAGGAGGC AAGGCTGGGG GAGGCCGGGG
   108901 CTGAGCACGC TGACCGTAGG CCCTGTGGTC CACTGGGGGT TCCCCCGCTC CGTCATCGTT
   108961 TCAGAGAAGC TGATGACCCC GGAGATGTTC TCAGAGATTC TCTGTGACGA CCTGGATCTG
   109021 AACCCACTGA CATTCGTGCC AGCCATTGCC TCTGCCATCA GACAGCAGAT CGAGTCCTAC
   109081 CCCACGGACA GCATCCTGGA AGACCAGTCA GACCAGCGCG TCATTATCAA GGTAGGCGGC
   109141 TCCTCACCCG CAGCGGGCCT GCCTTGTCCT CGGGGCTTGC GAGGTGCGGA GGTGCGTGGA
   109201 GGCCTCCACA GGAGCCTGTC TGGGGTCCGT GTTGTGGGGC AGGGCTCTGG AAGACTGTCT
   109261 CTTGGGCGGC TTGTCCCAGG AAGGGCACAG GCCGACTTCT GAGGAGGGCA CCACGTTCTG
   109321 GGCGTGTCCG GGCGCTGCTG CGGCCTTGCC GTCCACGGAG CGGAAGCTGG GTGGTCCCAG
   109381 GGGTGGCCCA GCTGGTGGGC AGAGCAGGGA AGGGCGCAGT GAGGCGAGCA CACTGCCACT
   109441 CTTGTCATGG GCAGGCTAGG CCAAGCACAC CCCATGCTGT CTCAGCAGCC CCCGCGGTCC
   109501 TGGGGGCGTT ACGAGAGAAG AGGGCACCAC CTGCCCCGAA CCCCGCTGAA GAACGCCTGC
   109561 CTGGTGGTGG ACAGTATCTC ACTGTGGTTT TGATTTGCAT TTCCCTGTTG ATTTGTTATT
   109621 GTTCAGTCGC TTGGTCCAAA GATTTGGGAC CCACGGGCTG CAGCACGCCA GGCTTCCCTG
   109681 TCCTTCACTC TCTCCCGGAG CTTGCCCAAG CTCATGTCCA TGGAGTCAGT GATGCCATCC
   109741 AACCATCTCA TCCTCTGTCG TCCCCTTCTC CTCCTGCCTT CAATCTTTCC CAGCATCAGG
   109801 GTCTTTGCCA ATGAGTCAGT TCTTCGAATC AGGTGGCCAA AGTATTGGAG CTACAGCATC
   109861 AGTCCTTCAG TGACTATTCG GGACTGATCT CCTTCAGAAT GGACTGGTTT GATCTTGCAG
   109921 TCCAAGGGAC TCTCAAGAGT CTTCTCCAAC ACCACAGTTC AATCAATTCT TCAGCGCTCA
   109981 GCTTTCTTAC GATCCAGCTC TCTTTCCTAC ATGACCACTG GAAAAACCAC AGCCTTGGAT
   110041 ACGGGCCTTT GCGGGCCTTG CTTGCTGATT AGTGACCTGC TGGCGGCTTG TCTGTCTCCT
   110101 GTGTCTGCTG GAGTCCTTCC CATTTTTGAG TCCGGGTTTT GCTGTTTTCT TGTTTTTATC
   110161 GGTTCCCTGT ATCTCACAGG CAGCGGTCTG TTCCCAGATG CTGTGATTTG CGGATGTTTC
   110221 CTCCTTTCCC TGGGCTGCCT TGTTATGCTG TCGGTAGTGT CCTTGGATGC ATAGAAGTGT
   110281 TGTATTTTGG TGAAGTCCAG TTTATTTTTT CGCTTATCAC CTATGCCTTT GACGTCATAT
   110341 CTGAGAAATC ACCGCCAAAT CCAACATCAT AAAGCTTTGC TCTGTTTTTC TGAGCGTTTT
   110401 ATGGCTTGAG CCATATGTTC TGTCTGTTTT GAGTTGATTT CTGTAGATGG GGCTGGGTAA
   110461 GGGTCCCACT TCATTCTTTC GCATGTGGGT TCTTTTTTCC CAAAACCGTT GGTTGCAAAC
   110521 ACTTTCCTTC ACTGAGTGGT CTTGGCATCT CTGTTGAAAA TCATTTGACT GCTTATTTGA
   110581 GAGTTTATTT CTGGGCTGTC CCGTTGGCCC ACGTGTCTGC TTTTACGTTA GTCCCACAGT
   110641 GTTTTCATTA TTGTATCTTT GCAGTAAGTT CTGAAATCAG GAAGTGTGAG TCTTCCAGCT
   110701 TTGTTGTTCT TTTCGTCATT GTTTTGACCA GACATCCTTT GCTTTTCCTT AGATTCCATA
   110761 TGAATTTTAA GATTTTTTTT CCTGTTTCTG CAGAAATGCT ATTGGGATTT TGATAGGGAT
   110821 TACATTTGGC TTTGTAGATT GCTTTGGGTA TTCATGTTCA GTTCAGTTCA GTCGCTCAGT
   110881 CGTGTCCGAC TCCTCACAAC CCCATGAACC GCAGCACGCC AGGCCTCCCT GTCCATCACC
   110941 AACTTCCAGA GTCCACCCAA ACCCATGTCC ATTGAGTCGG TGATGCCATC CAACCATCTC
   111001 ATCCTCTGTT GTCCCCTTCC CCTCCCGCCC TCAATCTTAC CCAGCATCAG GGTCTTTTCA
   111061 AATGAGTCAG CTCTTCGCAT CAGGTGGCCA AAGTATTGGA GTTTCAGCTT TAACATCAGT
   111121 CCTTCCAATG AACACCCAGG ACTGATCTCC TTTAGGATGG ACTGGTTGGA TCTCCTTGCA
   111181 GTCCAAGGAC CTCTCAAGAG TCTTCTCCAA CACCACAGTT CAAAAGCATC ACTTCTTCGG
   111241 TGCTCAGCTT TCTTTATAGT CCAACTCTCA CATCCATACA TGACCACTGG AAAAACCATA
   111301 GCCTTGACAG CTTAATAATT TTAAGTCTTC CAATCCATGG ACATAGGATG TTTTTCCATT
   111361 TATTTATATC TTCAATTTCT TTCAGTATGT TTTATATTGT TCATTGTACA TCTCTTTGAT
   111421 CAAGTTAATT TCTAAGGATT TTATTCTTTT TTATGTTATT GTAATTTGTT CATCCTTTCT
   111481 TCTTCAGATT GTGCAGTGTT AGCATGTAGA AATGCGGCTG ATTTTTGCAC GTTGACTTTG
   111541 TATCCTGGTA CCTTGCTGAA TTCATTCATT AGTTCTAATA GTATTTTGTT AGCATCTTAA
   111601 ACTCTGCATA TAAGATTGTA ACATCTCGGA CCAGAGATAG TTTTACTTCT TCCATTCCAG
   111661 GTGGATACCT TTGATTTATT TTTCTTGCCT AACTGCTGGA AGGGATTGGA GGCAGGAGGA
   111721 GAAGGGGACG ACAGAGGATG AGATGGCTGG ATGGCATCAC TGACTCAGTG CACATGAGTT
   111781 TGGGTGAACT CCGGGAGTTG GTGATGGACA GGGAGGCCTG GCGTGCTGTG ATCCATGGGG
   111841 TCGAAAAGAG TCGGACACGA CTGAGCGACT GCACTGCACT GAGTAGAAAT TCCAACGCTA
   111901 TATTGAACAA AAGTGGCAAG ACTGGGTATC TTTGGCTCGT TCCTGATCTT AGAGGAAAAG
   111961 TTACCAGTCT TCTGCCATTG TGGGTGATAC TTGCAGTGAA TTTTTTGACT GAATTAATCT
   112021 TGTTGATGTG GTTTCCATCT GATCTTAGTT TACTGAGTGC TTTTATCGTG AAAGCACGTT
   112081 GAAGTTTGTC TAATGATTTT CCTCCAATTA TCAAGATGAC TGTGTGGTTT TTGTCCTTCA
   112141 CTCTGTTCAA GTGGTTCATG GCATTGACCG GTTTTCTTAC TGAGCCGTCC TTACATCACC
   112201 AGAGTAAGCC CCACCGTTTA TAATGTGTTT GTGTCATCAT CCCATCATTT ATAACGGTGT
   112261 GTGATTCTTC TGACGTGCTG GTGAATGTAG TTTTGCTCGT GTCTGCTGAG GTTTCACATC
   112321 AATGTCCACA GTAAGTGCCG GTCTGCACCT TTCCTTTCTC GTAGTATCTT TGTCTGGCTT
   112381 TGGTATCAAG GCAGGGAGTT ATGATGTGTT CCTTCCTTTT CAGTTTTTTG GCAGGATTTG
   112441 ATAAGGATTG GTGTTAGTGC TTGAAATGTT TGGTGGAATT CACCAGTGAA GCCATCAGAT
   112501 CCAAGCTTTC TTTGTAGGGA GTTTTCCAGT TACCAGCGCA TCTTCCTCGC TAGTTAACCC
   112561 TTTTCAGAGA GATGGGGGTT GTTTTCCTTA CCCCAAGTAG CAGCACAGGG GCGCGGCCAA
   112621 GAACGAGGCG GGGATGTTCC GGGGAGAAGG GGTGGTGAGG GTGCGGCCTG GCCCCAGAGG
   112681 GGGCCGCTCT GGCTCATGTC TGTGCTCCCG GGCCAGCTGA ACATCCACGT GGGGAACATC
   112741 TCCTTGGTGG ACCAGTTCGA GTGGGACATG TCGGAGAAGG AGAACTCGCC CGAGAAGTTC
   112801 GCTCTGAAGC TGTGCTCCGA GCTGGGGCTG GGCGGGGAGT TCGTCACCAC CATCGCCTAC
   112861 AGCATCCGGG GACAGCTGAG CTGGCATCAG AAGACCTACG CCTTCAGGTA GGGCTCGGGC
   112921 CGGTGGTCGC CCCCGCCCGC TGCAGGGATG CCCCGGGACT GCCTGGGCTC GGGCCGGTGG
   112981 TCGCCCCCGC CCCCTGCGGG GATGCCCCGG GACTGCCTGG GGCCTTGATG CCAGCTACTG
   113041 AGGGCTGCCC CGCACCTCAG CGGCCTCTGT CGCCTCCTCC CGTCCCGTCC CGGTGGGGAC
   113101 ATTACTGAGA CCCTTGCTCA TTCCCTGGAC TTGTGCTCAG TCTCGGACAG GTCTGCCCTC
   113161 CCCCGAGGGG GTCTGGAGGC CACTGCCGCC TCTTGTTCAG TCCACGAGCA GGCGGTGGGC
   113221 GCCCCCGTGG GAGGGGGCGG CGTTCAGGCC GCCCTCAGAG CGGGGAGGGT ATCTGGTCCC
   113281 AGGTGCTGGT GGCGGGGACG CGGGTGGGCT CCTCGTGACC CCCGACCCGG TGGAGCTCGC
   113341 CCCGGGCAGC CCCGTCCCCG GGCCCCTCTT CCACTGCGGG AGGCTTCCAA ATTGGATGTC
   113401 AGGCTTTACG CGGCTGCTCG AGCTGCCACC GTCCCCGTGT GGTTTTACGC GGCTGCTCGA
   113461 GCTGTCACCG TCCCTGCATG GAGGCCGTCA CCAAGGGGCC ACCCGTGACA GGGAACAGCT
   113521 GAGGGAGCGC GTGGGGCTGT TTGCATCTCA GCTGCTTCTC CAGAAACCCC AGGAGGCAGC
   113581 GCCCACCATG TTCCTAGGAC TCGGAGCAAG AGAGGGAACA GCCGCCACAC GGGGCCCCCC
   113641 GCGACCACTG GCAGCCCCGG GGTCCAGGCC GCGCCCCGAG TCCCGTGGGA GGCCTGCTCA
   113701 TGGCACCTGT CCACGCACGG CTCACGAGCT GAGGCCAGCG GGCCTGGGGC CAGCCTGGGG
   113761 AGCCTCGCTT CCCAGAGCAG ATCCTGAGGT CCTGGGAGTG ATGTCGACAC CAAGTCCCTC
   113821 ATCCCTGGAG GCTGACTCAG AACGCACCTC TCACTGCTGT GCAGCAGGGG ACTCGGAGAG
   113881 GGTCCCCTCA CAGGCCTGGG CCGAGTCCCT CCTGCTCTGA CACTCAGGGC ACCTGGAGTG
   113941 TTTCTACTCA GGTGGCGCTA CTGGTAAAGA ACCCGCCTGC CAGTGCAAGA GAGACACAGG
   114001 TTCAATCCCT GGGTTGGGAA GATCCCCTGG AGGAAGGCAT GGCAACCCAC TCCAGTATTC
   114061 TTGCCTAGAG AATCCCATGG GCAGAGGAGC CTGGCAGGCT ACCGTCCATG GGGTTGCAAA
   114121 GAGCTGAACA GACTGAGTGA CTAACACTTT CACTTTTCAG GAGTTCGTTA TACATTCCAG
   114181 ATACAGGTCC CTTCCCACAT ATCTGAAGAT CCGCAGGCTT TTTGTGGTTT TCTTGGGTTT
   114241 GGAGTTCACT TGTGTGACAG TGCCCAGCTT AGCTGTTTTT CTCGGGGTGC TTGTGCTGCT
   114301 GGTGTCATAG CTGAGAAACC ATGGCCTGCC GGGTCCCGTC CCAGCACCGC TTGTTGGAAG
   114361 GACTGCCCTT TCCCCATCGG GTGGGCTGGG CCCCTTGTCC AGAGTCAGTT GATCTTAAGC
   114421 AGGAGGGCGA CACCGAGTTT TGTCTCCTCC TGGTTGGGGA AGTTCAGGGG GATCACTCCC
   114481 TGCAGTCTTG TTCTCATCTA CCAGGAGGGC ACAGCCATGC CTCCCAGCTG GCCTGCCGCA
   114541 CCTGTGAGGT TGTAAAAGTG AGGTCACGTC GAAGACGACC CTCCAGGCCC TCTGCCTCCT
   114601 CCGACACGGC CTCCCTGCTT GCACCTGGCG GGTGGTGGGA ATGCAGGGTC CCAGCCGGCC
   114661 TTGAGACCCA GGAAGCCGAA TGCCCGTAAG GGTGGGCTCC TGGCTCCAGG CCCCTCCTTC
   114721 CAGGCCTGGC CCGAGCAGCC CTTGGTTTAG AACAACCCCC TGGGATGCAA TCTTCCCGGA
   114781 GCCACAGGGA GGTAAACACA GGGCCTCCGG GACCCGCACT TGTTTAAGAG GAAGACGTGT
   114841 TTGCTCCCGT CGGCGTGGGC TTGGTGACTT TCGTGTCTGC TGCCCCCAAG GAAGGCAGCT
   114901 GGGAGCCCGC AACGTGAGGA GTGACATTTG GGTCTGCAGT GCTGGCTTCT GGACTGCCGC
   114961 AGCACCGCCC GGCTGGGAAG CAGCTGTCGG CAGGGTGGCT GGGGCGGCCC AGCCACCAGC
   115021 CTGGGACTCG GGGGCACCGG CTCGGGCCCG AGCCCCCACG CAGTGGGTGT GTGCTGGGTG
   115081 TTGCATGGCA GTGGTCCTCT GAAACCCCTC GCAGCAAGGA CACTGTCCCC ATTTTCCAGA
   115141 TGAGGAGCTA AAACTAAGGC CAGGGGTCTG TTTGTTCCTG TGCTGTTCCC CCGGGCCCCC
   115201 TCCTCCCTCT GGGGGCTGAC TCTGCAGGGC TCCTGGCAGG CCGACTGCTG GGGCTGAGCA
   115261 CCAGTGGCCC AGCAGGAGGC CAGAGGAGAG GACCCGGAGG CCAGCGTGGC GCCGCGGGCA
   115321 GGGTGGGTGA GGGCGTGGCT GAGGCTCGCC GGCAGGCTGG GCCTGGCTCC TGGCAGAGGC
   115381 AGCAGCTCGG CCAGGAGTCC CCAGCCTTTG CGGCCTCACC GAGGCTGACC CCCAGCCCTG
   115441 AGTCCACTTC GCCAGAGGGT GTGCAGGTGG CCCTCGGACG GAGTCTAGGC GCGTCTTTGA
   115501 GGGGCCCCGG GGTGGAGCAG TCAGGGCTTA TGGATTCTGG GCCCCTGTGA TGTGGGCCGA
   115561 GGGGCCCCCT GCAGGCTGGT CAGGGCAGGG GCCCTGGGAC TCCACTCCTG GGTGGATGGA
   115621 CTCCTTTGCT CTCCTTTCTC CTGGACACTG AGCGGGGCGG ACGGCCCTCC TCCTCCCAGC
   115681 AAGTCCACTG GGAATGGCTG GACCTGCAGC ACTGTCCTGT GGACCCCTCC CCACATGCAG
   115741 ACCCGGAGAT GCCATGTTGG CAGCGTGCCC GGCCGCCCTG TGTCGGGAGC CGGGTGCAGA
   115801 AACCAGGCTC CATGTCCTGT CTGCCCGCAG CGGGGTGGAC ACTGCTTTCT AGGGGCCTCT
   115861 CCTGCAGCTG CTCTGTGAGC CGTCTACCTC TCTCGTCCTC CACAGTGAGA ACCCCCTGCC
   115921 CACGGTGGAG ATTGCCATCC GGAACACAGG CGACGCTGAC CAGTGGTGCC CGCTGCTGGA
   115981 GACCCTGACG GATGCAGAGA TGGAGAAGAA GATCCGGGAC CAGGACCGGA ACACAAGGTG
   116041 CTGCCCCAGC CCCTTCCAGG CAGGACAGGG CCCCGGGCGA GGCTGGCCCT CGGGCAGGTC
   116101 TGACCACAGC CCAGAACAGG CTCACTCTCC CTGGGGAGGG GGGCGAGACA GAGGACGACT
   116161 TCAGGGCCCC ACGCAGCAGA GCGGCCGAGG GAGGGGCTGG GGGCTCCTGC CTCCTCACTC
   116221 GGTTGCCTGA GAGATCCGGG GGTTGCTGCC CTCCCCCTCC CACAGGCGGA TGAGGCGTCT
   116281 GGCCAACACG GCCCCGGCCT GGTGACCACC CCGTGGCGCT TGGCTCCCAG GGAGCATCTG
   116341 GAGATCAGCC CACCTCTCCT CCATCTTCTG GCTCGGAGGG GACCAGGTGG GGACAGCCCA
   116401 GCCGTCCTGA GGAGCGGGCC AGGGGCCTCC TGGTCTCCCG CCGCCGGGGA CACATTCCGT
   116461 CTGCTGAGCC CCAGTCCCCA CCGCCCGTCT CTGGTCAGGA GAGGCCACGT TGAGCTGTGT
   116521 TTGTTTTTTG TATAGAAGCC CCAGGCAGGG CAAGCAACAC TTTCTAAATA AAAAGGCAAC
   116581 AGGTTCTGTT TCTTCAAAGT GGTAGCATGG AGCTGAGAAC GGGGGACAGC ATGGCATGGG
   116641 CTGGCCCCTC GCCCTCCGGC GCGCACGTCC CAGCTGGGCC TCAGCAGGGC TAGGGCGCCA
   116701 CTGGACCCCC CCACCCCCAC AACCACGAGC AGGGCCAGGG TTCAGCTCAG GGCTCAGCCC
   116761 TGTGGACCGC CCCTCCTGCC CCCACGAGCA GTTTGACTCC CCTCGGCGTC CCACCTGCCC
   116821 AGCTCAGCAA GTCCTTGGAG TCCCGGGTGG CTGGGAAGTA GTGGGGCGCA GAGGGCAGGG
   116881 CCACCTGTCA GTCCCAGCCC AGCCCCCAGC CAGGAGCGTG GCTTCTCTGG CCCTTGCAGG
   116941 GGCCCATCCC GTGCGGGCAC TGCTGGTGGG CCTGTGCCCA CCTGTCCTGC TGCAGCTGGT
   117001 GGGCACTGCT CCGGCCGCAC CTCCCAGCAC CACGTGCCTG ACAGGAGAGC TGGGGCCCAC
   117061 CTCCACCCGC GGCTGGTGCT CTGGCAGGGC CCGGCGCCAG CTCACCGGGT GACCCTGCAT
   117121 CTTCTGTGAC ATGGACGGGT CCCCACGTGA CCTGGACGTG GCACCCAGGA GGGTGGCACC
   117181 TGGGTCTTCC TCCTGGGACC AGGCCCCGCA GGTGACCCAG GCCCAGTTGC GTTAAGCCCG
   117241 TGGGCCCGGG CCCTGCACCT TCCGTTGCTG GCAGGGCTGA GGGTCGCATA GCAGGGGCCT
   117301 CACACCACGA GGGGCAGAGC TCCAAGGGTT TCCAGTTCGG GGGTGGGCTG AGATGGGCCT
   117361 CGCCCCTGGG CTCGGGGGTC TCGCAAGCAC ATCCTAGGAA CTTGCGCTCC AGCCTCTGCC
   117421 CTCCATACAG GGCAAGGGGA CAGCGGGGCT TCAGAGAGGA AGGTTTCAGG CCCAGCTGGC
   117481 CTCACGGACA CTGGGCTCCA CCACTGGGGG AGATGTTCCG GCCACAGCAG GAGGTAGCCT
   117541 GAGCCCCAGA GCCAGTGGGG GATGACACTG CCTGCCTTCC CTGCTGGCCA GGCGGCACCT
   117601 GCCTGGAGAG GCCCGGGGAG GGGCCTTCAC CTGCCACCCA CTGCGGAGCC CGCTGCTGGG
   117661 CCAGAGGTTT CATGACAACA TTAAAGTCCA ACTCCAGAGC GAGTACTTTT ATCCTCTGTG
   117721 AAAGGGACAG CCGGCGGCGG CTGGTGCCGA CCCAGGAGTA AACCACCGTG CGGACTGGTC
   117781 CTCCAATGCC CGTGAGCTGG GGACCAGGTG AGGCTCCTGC CGGCCTCAGC TGCAAACGGC
   117841 AGGGGCAGAG CTTCCCAGAG GCCTCTGCCT CAGCCACTGG ACTCTGCAAA CACTGACACT
   117901 TGAGGCTTCG GAGTCACAGA AAGGGCCTGG CCCTCTTCTG CACCTGGCCC GTCCTTCAGT
   117961 GGCCTGGCTG GGAAATGAAG CAGAGGTCCC CTTGGGGGTT GCTAGTTCGG GACAGGAGGG
   118021 CCCCCACGGC CAAAGCTCAG CACAACCCAG CATCCCAGTC CCAGCCCCGC CCCTGAGATG
   118081 TGAGCCCCAT CAGTGGAAGC TGAATTACGG CACAGGCAGG GCAGGGATGA GAACCCCAGC
   118141 AGGGCTGCCC TCTGTGCTCA GAGTTCTGCT GGCGAGTGGG CAGGTTCTGG ACCCTCTCTG
   118201 GGCCTCCAGC TGTGCCAATG TTCTGGGTCG GAGAGCACGT CAGGCTTGGT GGCCCTGGCT
   118261 CTCGGCCAGC AGCACCTGCC CCGCGTGGAG AGGCTGGCCG CGGCAGGAGA GCCAGTGCTG
   118321 TGGCGAACAG GCTGCAGGTC ACTTGTTTAT TCAGGGCGGG GGCCCTGGGC CCAGGCCCGG
   118381 CCTCCAGGAC AGGGAGCTGC GTTGCAGGCC AGGGGTGGGG GTGGGGGACC CGGCTCTGGG
   118441 TGAGGTCGTC CTCACTGCTG CAGGGGTCCT GGCTGCTCCT CGGGGAGGGG CAGGTAATTG
   118501 GGGTCCTCCT CTGGGGCATC CAGTAGCAGT TTCCTGTGGG GAGGAGCCCA CGCTGAGCGG
   118561 CAGCTGGCAG GGTCCCCCCC CTCATGGGGT AGAGAGCCAT CTGGGGAAGG GGGTGGGGAA
   118621 GGCTGTCAGC ACTCACAGGA AGCTGGGGGT CAGCAGCAGC CTCTTGCCTC CAGGCTGGTT
   118681 GGGGAAGACG TCCTCCAGGA AGTAGTAGAC GTGGCCCACC GCAATCCCTG TGGGAGAGGC
   118741 GCCAATGCCG AGGCCACCCT CCACAGCCCT GAAGCCCCCA AAGCATGGGG GTCTGATGCC
   118801 CTGCACGGCC AGCCAGCCCA GCGTGGGGCC AGGCTTGGCC CAGAGTAGGC AGAACCTGGG
   118861 AGGAGGTCAG GCCTGAGGAC GTCAGAAGAA GTGGAGCTGT GAGCAGGCAC CCTGAGCCAC
   118921 CCATCCCTAC CGGGTCGGGC CCCACACAAG CGTCAGCAAA TGGGTCAGGC TCGAATAAGT
   118981 AAAACCTATA GGCTGACTTG TTGGAGGGGC TGGAAGGATG GGGGCGCCAG GAGTGGGGAA
   119041 GAGGGGTGGG GGCGGGGAGA GGACCAGGGC TCTGGCCCAG CACACCCAGC TTGGGGCAGG
   119101 CTCCCTGGAC AGCAGGCTCA CCCAGCAGGT CCACCAGGAT GGAGTTGCCC AGCAGCATTG
   119161 AAAAGCCCAT GAGCGCCCAG GGCAGGAACG GCGCCTGGAA GGTGAGGAGG CCAAAGAAGT
   119221 TGACCCTCAC CCCAGGGCTG CGGCGGCTCC ACACGTACAC CAGCATGGCC GTGAGGGCCT
   119281 GGCCCAGGAA GAAGAGGCTA CCCAGGAGCC CCAGTAGCTG GGCCAGAGTC AAGGTCTTGT
   119341 GCCCTGCCCA GGGCCCCTCT GACTTCCTAA ACCCCTGAAA CCCTCAAGCA GGTTGGTTTC
   119401 GCTTCCCACT CTAAGACCAA ACGGTGGCCT CCAGGGGCCC CCTGATCGGC CCTGCCTCTC
   119461 CACTTCACCC CAGCCCCCGG GCCCAGCCCT AGATCCTCCT GGCTACCTGC ATTCAGGACT
   119521 CAGCCCCTGG GCACCCTGCC CTGTGGTATT TTGGGTGTAG CCCTGGAGTT CGACAGGGGC
   119581 ACCTGCAGCT GAGCACGTGA TGTACGCTCA AAAACACCCT CAGCTCGGGG TCGCAACTCT
   119641 CCCTCTGTGG CATGCGCTCA AGCAGGGCCT CAGGGCCAGC AGAGGCCCGG ACCCATAGGT
   119701 CCCCGAGCCC GGGAAGGATA CAGTCATCAG GACGCCCCCG AAGAGAAACA TGAAGACGAA
   119761 GTCGGCCGTG CGGCCGCGGA AGGAGCCCTC CTCCAGCATG CGGCAGTAGC GGAACCTGCG
   119821 GCTTTGGTAT AGGAAGCGTG CCCCTTGGAG GGTCTCAGCT TCCCGGGGCC CGCTGCCTCC
   119881 CGCCCGGTCC CCCGCCCCGC CCTCCTCCCG CTTCCACCAC GGCGCAGGAT ACACGAAGAG
   119941 CATGTTGAAG AAGAAGCTGA ATCCCAGGGG CCCGAAGAAG AGGAAGTTGG TGATGAGCCT
   120001 CCAAACCTGC GTGGGGTGCG GCGGGGTGGG GGGCGGTCAG GCCAGCGCTG GGCGGGAGGG
   120061 GTTGGGCCAG CAAGTGCAAG GGGCGGGGCG GCCTCACCTG GAACTTCCGG AACACGAGGT
   120121 GCGGGTTGAA GTAGAGCTGG AAGGGACTGA GGAGTTCCAG CTGCTGCGGA ACCAGGAGAT
   120181 CTTAGAAACT GCCCCCCGAC CCACCCACCC TAGGGGAGCA GGGTCGGGGC GGGGAGGGTC
   120241 CAATCGTAAC CTTGGCAACC CCCGGGGGCG GTTACCACGG CGGCGGTGGT GAGGACGCAG
   120301 GCCGCGGTGT ACGTCCGCGT CACCGCCGGC ACCTGCAGGA ATTCGGTCGC CAGCCCCTGC
   120361 CACGCCATGG ACGCTTCCTA GGCATCGTGG TCGCACTGCC GCGCTCTCTT AACACGCCTC
   120421 CAAGCCCCGC CCATCCACCT TCACCCAATC CGCATCTGCG GTGGAGCGCG CCCGCAGCTG
   120481 GAGGGAGGGG CCCTGGGGAA GATAGCCAAT AGGAAGAGAC AGCGGAGGGC CGGAGGGCGG
   120541 GACGGGGCGT GGGCGGGCCG TGACTCGGGG CCAATGAGCA GGCCCCACGA TGGAGCACGT
   120601 GGCGCGTGTT GTGGTGCCCT AGGCGGCGGC GCGGGAGAAG GTGTGGCCAA TGAGGAACTG
   120661 AACCCTTAGG GGACTTAGGG GCGGCCGGTA GCGGGGACAC CTTGGCCCAC CCTGCGGGCG
   120721 AGGCTGAGGC TACGAGCACT TGTTAAAGGG GGCCTCCCCG CCCCCGAGAG ACTGAGGGGT
   120781 GCGGCCTTGC AGCCTCCGGC CCGGCCCCCC ACCCCAGGTC TCGCCGCTTC CTGGCCTCCA
   120841 CCCACGCAGC GTGGGTGGGG CATGGGCGGG GCGGAGCCTG GAGTTGGACC GCCCTGCTCA
   120901 GCCAACCCAC CTGGGCTGGC TGGGGTCCCA GGCTGTCCTT CTCTCTGAGA ACCAGAGCAG
   120961 CAAAGGAAAC GCTCGGCGGC TGCGTGTCCA AATCTCCCTG CAAGCCCAGG CCCCGCTGAA
   121021 ACTGCCGGTT CCTTTGGGAA GCCCCAACGA GGGCCGCCAG AGGAGGGGCA GACTGGGGAC
   121081 CTGCAGCACT TGTGTGAAGA GAGGGTGCCG AGACCGGCTG GTGCAAGGGG ACGGGCTAGA
   121141 GAGAGCCTCC TTACTTGGGT GGAAAAGAGA AACTCCATGT ATTCTTCTAA TGAACACGGT
   121201 CCATAGTTTA TTGAGCATGG ACTGTGTGCC AGGCACTGTT GTGGATGCTT GGAGACACGG
   121261 TGGCCAACAA AAGATGCTGT CTGTCCTGGT GCAGCCAAGG AGACCGGGGG GTCAGGGGCT
   121321 TCTGCTAAGA TGAGAACTAG TGTTTGCAGG ACAGTGCGCT GATGGAGATA AGAGCCAAGT
   121381 GGAGGCTGGA GGGTTGGGTA GCGGGCCCCT TGCCAGATGC GATGATCTGG GAAGGCTCCG
   121441 TGAAGAAGTG ATGCTTGATT GTCACTTTAA AAAGATGCCT GTGGCTGCTG TGAGGACAGC
   121501 AGAAGGCCAG AGAAATCCGG GGGCAGGTGG AGGATGCCAG GGATGCTGGT GGCTTGGGCA
   121561 GGGCAGAACC TGGAGGACCA GGAAGGACGG GATGGGGGTT TTGCCAGCAG ACTAGATGGA
   121621 GCTGTGAGAC AGGAGTCAAG GGTGACTTCA GGGACTGAGC CATAGGGGAG ATGGAAGGCA
   121681 GTGGCCTTTC CTGAGCTGGA GAACGCCTGG GGGGAGGGCA AGCGGATGGA GCGTCCTGTT
   121741 CTGGCCTCAC TGAGTCTGGG TGATCTATGT GACATCCGCA TGGATTTGGA GGCCAGGCAG
   121801 GTGGCTCAAG TGTGGGTACC AGTCTTAAGA AGACCAATGG CCTTTGTAGC CTTGGGCCCA
   121861 CGCGAGAGGC CCGAGGCGCG AGGCCAGGCC CAGCCAGCTC GACCTTCATG AGTTAGAGAG
   121921 AGAAGGTGGA CAAGCAGGGA GGCTGCAACA GAGCCAGGAC AGGGCTGCAG GGGCCAGGCG
   121981 GTGGGAGGCC CTGGGACACG AGGCCTGGGA AGTCTCTGAG ATGCGCAGCC GCGCCAAGGG
   122041 CCCTGGATAA CAGTGGCCAC AAGGGAGAGG AAGTGTTCAG ACCTTTACCA AACGGGAGCT
   122101 CAACCTCGGA CTCAAGTGTG ACGGGTGAGG GAAGCCCTGG GTGGGGCCCT GAGTGCCCCC
   122161 AAGGAGACCA GAGTGGAGAC AACCAGCCAA GACGGTTATC TCCGATGGAT CACGGGAGGG
   122221 CTAAGAGGAG CCCCTGGGGC GTGCTCTTGG AGGTCCACTT GGGAAGGGAG GTGGGGAGAG
   122281 AGAGGCGTGG ATGAAGGGGG ATTGTGCATT TGGTTCAGGC ATGAGGAGAG GTCAGTCTGA
   122341 TACAGCAGGA GTCGGATCAA GGAGATGGGA GGCTAGGCGG TGGGAGCAGG CTGAAAAACC
   122401 CCTCCCTCAG GCAGCCTCTG TTTCCCAGGT GACCAGAGCT AGGTCAGGCT GGAGGTGAAC
   122461 CCGGAGGAGC AGAGCCCACC CAGCTGAAGG TGCGGCTGCA GGCCAGGGAT CCAGGGCCTC
   122521 AGACACCCTG GCGGGCGTCC GCCAGGCTTG AAGGAGCCAG CGAGAGGGGT CGAGGTTCCT
   122581 GTGTGCGTGG GGAAGGGGAG GCATTCCAGC CTGCCAGCCA TCAGCAGCAG GTGCTGGCTG
   122641 GCCCTCTGCA GGGGTCAGGC TGGGGCTAAT GGAAGGGCCA TGATGGGATA GAGCCTGTCT
   122701 CTCCCCTTTG ACGGGGCCGG TCAGGCAGGA GCCTGGTTTG GGGCTGAGGA AGCACACTCC
   122761 TGGGAGGCTG GGAGCCCCGG GTGGGGGCAG GACGTGCCAG GGACAGCGCA GGTTCTACTG
   122821 CAGACCTTCC GTCCTGCCTG GAGGGTCCTC TCCCAGAGAG TCCGGGGGGT CCCCAGGTGG
   122881 GGACTCACGC CCCGTAGGAG GCAGAGCAGG GCCTGGGGCA GGCCATCGCC GCGTGTCCGG
   122941 GCTTTCCCGC CCAGAATCAG GCCCAGGACA GGCCGCTCTG GAGGCACCGG ATCCGCGGCT
   123001 CCCACCCCCA GCACCTCCAG ACGGTTCATT ACATAAAGAG GTCCCGGGCT CCACTCGTTC
   123061 CCGGGAGCCA GGCTGACCCA GGAAGGTGGT GTGCTGGATG CTGACGGCTT CTACTCTGTC
   123121 TGTCTGTCCT GAGCAGCAGG GCCGCCTCCT CTCTCCTGGG CTGAGGACTG TGGGGAAGGG
   123181 GCCTGTGGTC CCTTGCTGGC CTGGGGCTCC TGCCTGCTGC CGAGCAAGGA GCTTGGGGTG
   123241 CCCAGGTATG GAGACCCCCA GCTTCCTCCC CTGTCCTACA GGCGGGACAG CACCCTCTGC
   123301 CTGCCCACAG TGCCCGCCTT CCTCTCAGGG CTCACACCAG GAGAGACCCT CGTGAGCCCC
   123361 CAGCAACAAC CCCAAAACCG GGGGCCATCC CTGCCCACAT CCCCTCCCAC AGGGAACCCT
   123421 CCAGCCCTTC CCCCACCCCT TAGTCAGCAT TCCTCTCCTG TGACGGCCCA GATCTGACTC
   123481 CTCCGTTCAC TCACTTCTTT CCCTACCATC CTCAGTGTTC TGTTAAAAGA GATAGAGGGA
   123541 GGGTGCTGGA AATGCCCCCC ACTCCAGGAA GCCTCCCTGA AGGGACCAGA GCTCACCTAC
   123601 CTTCTCTTAG GGCCCTGTGC ACTCAATTTT TAAATGTTAG TTTATTCTGA ACGCAGCACA
   123661 GGCCCGAAGC AGAGACACGG TAAGTGCTGG GGCTGCGGAG TCTTCCTGTG GATGACGGGG
   123721 TGCCCTCACG GGGCCTTCCC TCCACCCCCA CTGCTGTGGA TGGGCCTCAC TGCAGCTCCA
   123781 GCCCGCGCCC CCAGGAGCAG CTGGGTCCCC GGTGGCCCTT CCTCTCTGGG TCACGGGATA
   123841 TTTTTAGCAC TGATTCCGGA ACTCACTGTG CAGCAGCTGC TCGTGGCAGG AAGGTAAGAC
   123901 GGACACACAG TCCAGGTGGG CTGCCTCAGG GCTACCCAGC AGAGGGGGCG ACCGGGGCCT
   123961 TCCGAGCCTC GTAGCAGACT CGACCTTCCA GGAGTCTGAG GGTCTCCGAG TGGGCTGGGG
   124021 AAGGCAGGGG GGCTGTCAGG GTGGAGGAGG AGGACAGAGA GCTCGTGCAA AGGTCCTGAG
   124081 GCGGCCGGAG GAACAGAGGC GGGGGGCAGG GAGGGGGGCT GCACGTGCTG AGAGGCTGGC
   124141 CCACCAGGCC CTGCAGGCTG TGTTCTCTGT TCTGCGGGCA GCGAGGCGCC TCAGTGGGAT
   124201 GAGGTCAGAT GGCAGCTGGC TCTTTGGAGG AAGCAGAGGA TCAGAGGAGA AGATAGCCAC
   124261 AGCCTGCAGT GATGGGCACT AGGCAGAGAG GGTGGAAGGT CCAGGAGGCA GGAGGCACAG
   124321 ACCTCAGTAA GCACCTGGCC CGGTGAGGGA GCTGAGCCGG GGAGGGCCAG GCCCAGTTCA
   124381 GAGACTGGCT CCTATCACGG AGTCCTGACA AGCGGCTCTG CGCCCAGCCT GCTCCCTGGA
   124441 TGAGCAGTGT GGCCTGGGGC TCCCCACCTG GCCCTCGGTT GGCTGGATGA AGTGGTCCCT
   124501 CCCCAGCTGC CGGGCCAGCC TGACCCTCAG TGCCTGGCTG TCACGACCCT CGGCAAGTGC
   124561 CCCGCGCTCC TGCTCACCAC TGTGACCGCC GCCTCCAGCT GGCACCCGGA GCAGCTGGTG
   124621 GGGCCTCCCC CTCTCCGCCC AGGGCTATGT TCGGGTTCAG TGTGGCTGCG GGGCCATGTT
   124681 TTGGAAGAAG ATTATCTGCT TGGCCAAGTC AGCCAAGTGG CAGGGCTGGG GATGCGAGTT
   124741 CCTGGAGACA CGTGTGTCCC CGCGTGGGTC TGCCCCGCCC CCCCCGCCCA CTGGGCTGCA
   124801 TGTGGGATCT GGTCCAAATG AAACCTAAGA CCATGCTGTC CCATGGCCTT CCTTAGCCGT
   124861 TGCTGGCCAG CCAGGTCATC AGACAGTTCC GGCCTGTGGT CTGGCAGCGA CCTGGAAGGC
   124921 CAGGGCCACC ACTCTGGGAG AACCAGTGAC TCAGCGCTCA GAGAGGCTGG GAGAGGCCCG
   124981 GGGCACCACA CCTCCCTCCT GGCTTGTCCC CAGACAGCCC TGCTCCCACA CCCGGGAAAG
   125041 GGAGCCCCAG GCCGGGTGCG GGAACAGGAA CCCCGTGCCC TCGGGCCCCC TGGAGACACC
   125101 ACCGCAAGAC CTGCCGCCAG TTTACTCAAG ACCTTCTCCC AGCCTCGCCT GCCCTTCACT
   125161 TGTGTGAGGT ATCACGGCCT CTTTAAAAAA AAAAAAAGCA AAATTACAGA TCTAAGATTA
   125221 GGTATGAAAG TACCTCGTTG GCTTAGTATG GATAAACAAA ACCAGCGACA AGCTCGTTAA
   125281 AGGTAATAAA TAGCACTTCA TGTCACAGCC GGACAGAATC CCCTCCCTGG TCAGAAGCCG
   125341 CGCCCAGGTC GAGCCGGGGC TGGTGAGAGA GAGGCCCCAG TAACCAGGCC CCCAGGGAAA
   125401 CAGGCTGGGG TGTGGGGAAG GCACTGGGGG CGGATGGGCC CAGGAAGGGG TGGGCTCCCT
   125461 GTTCAGCTCC GTCCCAGACC TGCCCAGGTG GCCCGGCCAC AGGGGACTGG CTGCTTTGGT
   125521 GTTCTCCCCC TCCCCCGCTC CACGGGCCCT GCTGGGAGGG GGCCTCCCTC AGCAAGGAAT
   125581 GCGGGTGTCA GCGCTACAGA CGCTCTAACT GCCATCCCCA CCGCCCCACA ACCCCACCCC
   125641 GACCCTTGCC TCCAGATGTG GGCACAGCTG TAGTTTTAGA ACAGCCAACC ACAAGGACAT
   125701 TCTTTCCTTC TAATTAAAAT GGCTTTAAAT CTCTGGTCCC ACAATTGCAC TTGGCTCCAC
   125761 TGCTCAGTCC TCGAATATCA GAGGGTGGTC AGGAGGGTTG CTCACCCGGG GGTTGCTTGT
   125821 GGTTTTCTTT CTTTCTTTCT TCTGAATTAA GTTGGAAATG TGTCCCAGAA CTGGAGTGGA
   125881 CGCCAGCTCA GAGGGGAGGG GGCGGGGAGG AGGGCGGAGC TGGGTCTTGG GGTAGAGTCT
   125941 GCCTCTGGCT GGCCAGGTCC ACAGGTGGGC CAGGTGTGTC TGGAGATAAA GAGAGGACGG
   126001 GGTAGCTGCC CTCAGGATGC TGGGTGCAGG CAGTCAGTAG ATACACGTGG GGCCTGAGGA
   126061 TGCAGCGCCT GTGTCGGGGG CAGGCCGGTT GTTATGATGT CCCCATTTCA CAGGTGAGCA
   126121 GACAGAGGCT GGGAGACGGG AAGTAAGTGC TGGGATCGTA GGGGCTCCGT CGGGATCCAC
   126181 CATAACCAGG CCCGTCGCCG GCCTGCTGAG CTTGGTGGTG GCTCACTGCC CACCTTGGCA
   126241 GCCTGGTGGC CAAGGTCAGC TGGCCTCTGA GCTCCGCCCA GTGCCCACTC TGGAGGCTCC
   126301 TGGTGTGGAG TAGAGATGCC AGCCCAAGTG GGAAGGCTAC AAGGAGGAGG AGCCTTCGAG
   126361 CAGCCTGGAA CAGCTTCTGA GCCCTTTAGG GAAGGCACCA CTGACCGAGA AGGACACTGA
   126421 GGTCAGAGAG GGGGCAGTCA GGTCAAAGGC GTTCGGCCCA CCGGTGGTCA GGGGCAGTAG
   126481 GGGCCCAGCC ACCACTCCAC CGGAAGATGG GCACCCAGCT GACAGGCGGA AGGACAGACT
   126541 GGGGCCTCTG GGGTCCAGCC TGGGCCCTGG TTCCAGGCCT TAGGCCTCTG CCCAGACTCC
   126601 TGTCCCACGA CTTCATGGAT CAGAGAGGGA AGGCACGCAG CGAGACAGAG GCAGGGTGGG
   126661 CTGGGTAGCA GACCTCCCAA GCCCCCTCCA AGGCCCTGGC TCAAGGGCCG GGCGCGGGCT
   126721 GGGCGCGCAG GACAGAGGAA GCGAAATCAC CCGGGGATCG CGGAACCGAG GATGCCCAAA
   126781 CTCGGCCAGG AGCCGCGGAG GCAGCTCCTG CTGGAGGGGC CCGCGCCTGG CGGGGCGCCG
   126841 GCTCAAGCCT CTTTGTCTCC GCCCGCGGAG CCCCAGAAGG TCCCGCCGCG CCGACGCCGG
   126901 CAGCGCGGGC TTTGTCGGCC CCTCGCAGCC GGAGCGGGTC TCCGCGGCGC GGGCGGGTCC
   126961 CTAGGAGCTA GCGCCCGGGG CGGGCTGGAC GGGTCACCCG CGGGTCTGGA GGCCGCATCT
   127021 CTGGGGAAGG CCTCGAGCCC GGGTAGTGAT GGAGGCCTCA TCTTGGGGGG GGGGCGGGGG
   127081 GCGGCGGGCT CCGGTCGACC AGGCGGCCCC GCCGCTTCTG CGGGGCTAGG AGTAGCCAGC
   127141 GGCTTTTAGG GGCGCGGACC CGGTGGAGCC CTCCAGGCGG CTTTGCGGTA TCGATCGCCT
   127201 GCGGTGCGAG CCGTTGCTGC TCCCGCCTCC GGTTGAAGGC TGGGCGCGGG CCTCCCCGGC
   127261 CTCCGCCCTC CCCGCCGCTC TGGGTCTCAG TTTCCCGATC TGCAGAATAA GAGGCTCGGG
   127321 CGTGTAGGAG CGAGAGCGGG CCTGGCTCCC AGGCCTGGGG AGGGGCGCCA CCACCCACGC
   127381 TGGCCGCGGG CGCGGAGGTC CTGAGCACGG TAGCTACGGG CAGGCCGCCC CTCCTCCCCT
   127441 GCTGCCTTCT CCGCCTTCCC ACCCGGGAAA CCGAGAATGG GTGGGACTCC ACGCGGGAAG
   127501 GCCCGCGGGG GAGGCGGCTG TCCACGCTCC CCCGACTCGG GCGTGGTTTG GCGGCCCCGT
   127561 CGCGCAGGGT CCGCGGCGCC GCGCTTGAGA TCTGACAGCC CAGCCCGGAC TCCCAGCACG
   127621 ACCGCGGGGC ACAGGGTGCG AGCTCCACCT TGTGGCGCCT CAGGGACTCC TCCGCAAGGG
   127681 AGGCTGAAGC CACCGCGTGT GGGGTGTTGA GAGGATTCGT CATCAAACAC CCACAACCTT
   127741 GACTTGCACA TGCTGAAGGT TAAACTCCCG GTTAATGTTT GCCGAAGAGA AATCTCAAGC
   127801 TTCCTTGCTC AAGGATAATA ATTAGTGTCT GGGGAGCCCA CGCACTGAGG GGAGGGGGGG
   127861 GAGCTGACTC CAGCAAGGTG TCCAGGCGGC ACAGGGGGCG GGGGGAGGAA GGCGGAGTGG
   127921 GTGCTACTAC AGCAGTGGAT CATCTCAAGA GATGCAGAAA GGCGAGCACT TGGCAACTGC
   127981 TAATATTTTA TCTTGCGTAT TTTTCCTTAA AAATACATGA CGCTTCAAAA GTTCAGAGCA
   128041 ACGAAAATAA AACCCAAGCA GGAGCAAGAG GAATGCTGCA TCGTCCCTTG CGGTCTGTGT
   128101 CCTGTCGCCG TCGTCGCTCA GATGACTTCC TAGGGTGACT TTCGGGTCTA TGTTTCCATG
   128161 ACCACAAATA GCATCTTTGG CAGGTCTGGT TTCGATTTGA CCTTAATTGA CCTCCTGGAT
   128221 TCACGCAGGA CCTGAGAAGC CCTAAGAAAT GAAAGATTAA TCCGGCCCAG TGGATCCGCT
   128281 AGTTGCTCAC CTCACAAAGT CCGCTGGACT GGACTCATCT TGTTTCCGGG GCCAGCGCGG
   128341 CCTCGCACAC AATGTATGCT TGGGCTGCAA CCCGAGACCC GCTCTCCCAT CCGGGTTCCT
   128401 ACTCCGCGGC TCTGCGGGAG ACGGACAGAT GAGAGCGCTC CGGAGACTGG TGGGTCGGCC
   128461 TTTCATCCCT CCGAATCCTG CCCCTCCTCC GGGGGAAGGG CGGAGACACC TGGGCTGGAG
   128521 GAGCGTGGGG ATGTCCGCGC AGAATCAAGG GCTCGGCCTC AGAGTGCCCG GGGACGGGGC
   128581 CCTCCCGGGG ACAGCGGTCT CCCGGAACCT GACAGAGGGC GGGGGCGCCA GATGGAGGTG
   128641 AGAGGCGGCC CCGAAGAGGG GCCGGAAGGG GCGGCGGCGG AGATCCAAAG AAGGGTGCGG
   128701 CAGGGACCGG CAGAAAGTCG GTCCGAAGGC CGCAGCGGAG CAATGCACGG GGAACCAGGG
   128761 CCGGGATTTC GGGCGAGTCC GAGCTCGTTG ATCAGAGCCG CCTGCCAAGA CCTGCGGGGG
   128821 GTGGAGGCAG GCTTTGTTGG GCGAGAAGTC CCCGGATCGG AGCTCCCTTC CGGTCTGCAG
   128881 AGGTGGGCCC GGGCTGGTCT TCGGAGCTGC AGAAACGGGG GGATGGAGGA TGCGCGCGAG
   128941 CCGCCTCATC CCCAATATAG CCTCGGACCC TGGAGACCAG CTCGCGGGCC CCCCCACCCC
   129001 TCACTCCCTG TGCGCCTGCG CGCGCGTTAA GGTGCGCCTT GCCCCAGCCT TCGCAAGCGC
   129061 CCACCGCACA TTCGTCTCGC CTTCCCCTCG GGTCTGCTTC GGGCGAAGGT CTGGCTGGGG
   129121 CGGAGGGTGC TGGACCTGTC CCCCACTAGC ATCACTTAGG TTCTCGTGCG GGCCAGACAG
   129181 CGCCCCCAGA CTCAGCAGCC CCTGGCCACT GCGCCCGCTC CTCTTCCTTT CCGGGGCCTG
   129241 TTTCCCACCT TCGTCTCCTC CACGCTCCCC CTAAACTCCG TCTCCATTCA CCTCCTGCTT
   129301 CACCCAGGGA GCCAGGCACC CGAAGCGCAG GTCCACAACG CCCACCACCC CATCCCTGGG
   129361 GGCTCCCCGC CAGGGCCAAC CCCCCGCGGA GTCCCTTCAC ACCCCTGCAC GGCGCCTCCC
   129421 CTCATCTCCT TGGTCTTCAT GCGGGCGCCC CCCTCAACTC CGGGCTCCTT CCCTGAGCAC
   129481 ACCCCAGACC CCGGCCCCTC CCCTTCCCCC TTCTCTCTCT GAGTGTCTGC AGCAGCTGAC
   129541 ACTCTACGTG TTCTCCTTGC TCATTTGTTA CTGCCTGTCA CTCTCCCGCT GGAAGAAAAG
   129601 TTCCGTGAGA TCCCAGGTTT CGTCTCTTTG GTTCACTGCT GTATCCCCAG CACCTAGAAA
   129661 CGTAGATTTA TTGCCCAGAA TGGGAAGGCA AGCCATCTTT ACTCACTGAA TGACTCCTCG
   129721 CTACCATAGC TAATGTTTGA AGGCTTTCAT GACCAGTTGC CGCAGGCCTA GGTGGTCTCC
   129781 ATGCACGGTC TTGGGGAATT AAGTAATTTA TGCTGCCTTG GCGACCTGCC GGCCTCCTCC
   129841 CTGCCACATG GGCTCAGTTC TCACCAGGTG ATTTGCCGCT TCCTGCGGAT CTGCGCACCC
   129901 AGTGGGACTC TCACGGGCAG GCAGCCCATT AGGGAGCTTC CTCGTGACTC CATCGGGATC
   129961 GGACTCCCGG GTTCCCACCT GGCTTCCCTC TGTGGCTTCC CGCTTGGGAG GAAGTCACTT
   130021 AGCCTTATAG GAACTTGGCG ACCGGCCAGG GTGCCCGGCA CAGAGCTGCC CGCAGACTGG
   130081 TGGCAACATC TTCGGCAGGG TCCTGCCCTG GGAGCCTATT CCCCCACCTC CCCACCCCAG
   130141 CGCAGTTTCT CACCATCTGG TGGAAGCAGA TCTGTTTCCA GCCCTCCATC GCCCCTACCC
   130201 GCCCCCTGTA TCTGCCCCCC AGCTCAGTTC CTGGCTGGAT CAGGCACTCG GTATTCCACA
   130261 GATGAATGAG TAAGTAGCCT TCGGGTTCTG GAAATTTTTC ACAAAGTCCT GAGCCAAACA
   130321 TCCTTCTGCC ATGAAACTTG TATTTAAATA TTAAAAAAGT AATAAATATG ACACAGTACT
   130381 TTATAGCTGG GCGACAATTT TCCAGAACAT GAAAGGTAGT ATAGAGTTAT TGGGAAAAGA
   130441 TCAACAATCC GATTTTTGTA CAGTTAACGC TTTGTGAGTG TCTCGTCAAA CATCTGAGGG
   130501 AAGCAGGTCA CTGCTCTCTG GGAGAGTGGA GAACCTTCAG TGTGTACTGA GCTTTCAAAA
   130561 GATTTAATGA GCATGTGTGT GCGTGTGTGC ATGCTAAGTT GCTTCAGGCG TATCCGACTC
   130621 TGTGCAACCC CACAGACTGT GGCTCACCAG GCTCCTCTGT CCATGGGATT CTCCAGGCAA
   130681 GAATACTGGA GTGGGTTGCC ATGCCCTCCT CCAAGGAATT TTCCTGACCC AGGGATCGAA
   130741 CCCAGGTCTC CTGCATCTCC TGCAGTACAT GCGAATTCTT TACCGCTGCG CCAGCAGGGA
   130801 AGCCCCTTAA TGAACATACT CTTTTGTAAT CAAAAGGGAC AAGACAGGGA TGTCCCTGGT
   130861 GGCCCAGCGG TTAAGACTTC ACCTTCCAAC GCAGGAGGTG CTGGTTTGAT CCCTGGTCCT
   130921 GGGAGCTAAG ATCCACATGC CTCTCAGCCG AAAAAAAAAA AAAAACCATA AAACAGAAGC
   130981 AATGTTGTAA CAAATTTAAT AAACACTTTA AAGAAATGAC CCACACCAAA AAAATCTTTA
   131041 AGTGGGGGGT GGGAGGGAGA CTCAAGAGGA AGGGGATATA GGTATACTTA GAGCTGATGC
   131101 ACGCTGTTAT GCAGCAGAAA CCAACACAAC ATTGTAAGGC AATTATTCTC CAATTAAAAA
   131161 TAAATTTTAA AAAGTGTAAA AAAAATCTTA AAAAAAATTT ATATATAAGA GGCAAACTCT
   131221 AAATAGATGG TGAATCCCTA GGAAAGCTTA CCAACCTAAC GACGGGGCGT CAGGGCTCTG
   131281 AGCCTCCTGG GGGTGCCCTG GGGAGTCGCC CGCCTGTCTA GGGGTGCTGC TCCAGGACGA
   131341 GAAGATGCCC TCTTGCTGTA CCAGCTGTGT GTGCGCCGGC TGCCCCCAAC CTGGAGGTCG
   131401 TCACCAGCAT CAGCGGGGCT CCGGCTGCTC TCTGCGGCTC AAGGTGCCTC CAGGTCCCCA
   131461 CACATGTAGG TCCACATGGC CCCTTCTCTT AACAGAGGGG GGTGCCCGGC CAGTCTGTGG
   131521 AGAAGCTTCA CAGAGCTTCA CCCCCTGGGG CCCCAGCTCA GGGTGTTGTC CCCTGAGCCA
   131581 CAGCAGGCAT GCCCGGGGGC AGCTGGGCAA GGGTAGGGGT AGGGAACTGG GAATGGCTGT
   131641 CCGTCTCAGG AAAATGCCAT CAGGGCCGAG GGGCAGTGGG ATCCCGGACT CAGAACAGAA
   131701 GGCGGGGGAC ACCTCTGCTA CCTGCTCCAC GCTGTGTGAC GGAGGCAACT TTTCTCTGCC
   131761 TCCGTTTCTT CATCTGCAAA GCGGGGACGT CACCACCGCC AGCTTCAGAC AGATCGCCAT
   131821 GCTGGGACTG GTGGGCTGCA GCCCCGCGGA GGGAGGTGGG GGCTGCCGTC GGCCACTGGG
   131881 TCCTCTTCTT GCTCCTCAGG CTCAGGGCAG GGTCCTGCTC CTGACCATCT GTGCGGCTGG
   131941 TATTGGTGGA ACTTTCCAGT TCGGCTACAA CCTCTCCATT ATCAATGCCC CGACCTTGGT
   132001 ACGTACCCTG AGTGCCCACT GTCACCACCC CAGCGTCAAC AGCGGCCCAC GTCACATCTT
   132061 CAGGCCGCCA TCCGCTTGGT GGAGCTTCCT CCCACGCCTC CACCTCCACT GGGCTGTTCC
   132121 CCAGGCCCTG CGAGTTCAAA TCCAGCTCTG CACTCTCCCC TGAAACTCAC ATGTGCTCCC
   132181 GTGTCTCTGA TGTCAGCAGA CAATTCCCCC TGTGCCCCCA GGGAGGAGGT CCACCCTGAC
   132241 TCTGCCCTCC CTCCTGGAAA AACACAAAGT CCTTCCTGAC TATCTCTGGC TTCCAGCCAT
   132301 TTTTCCTTGG GTCTCTGCCA TGATCCTAGT TTAGACCCAT CTTTCCTGCC GGGATCACTA
   132361 GCCCCGCCTC CCCACTGGCC TCCCTGCCTT CAGCCTCTCC CCTTGTAGGT CCTCTCAAGT
   132421 CTGATCAAAC CACTGCCCTG CTCAGAAACC TTCTGTGACT CCCAGTGCCC ATAGGAGTAA
   132481 GGACAGACTC ATCTACCTGA GGGCTTCCCT GGGGGTTCAG ATGATAAAGA ATCTGTCTGC
   132541 ACTACGGGAG ACCCAGGTTC AATCCCTGAG TCAGGAAGAT CTCCCGGAGA GGGGAATGCC
   132601 AACACGCTCC ACTTTTCTTA GCTGGAGAAT TCCATGGACA GAGGAGCCTG GCGGGCTACA
   132661 GTCCATGTGG TCTCAAAGAG TCAGACATGA CTGAGAAACT AATACACACA CACACACACA
   132721 CACACACACA CACATCTACC TGAAGTCCAA GGGCCCCTGG GGTCCGAACT TGTCCACCTG
   132781 TCTCCCGCCT TGATTCCCCC AACTCTGTGC CCAGAGCAGT TAAACACAGA CCCCACCCCC
   132841 CACCCCCGTG GGCCAAGCCC TCCCTGCCCC TCCTGCAGAA GCCCCTCAAG AGCCACCCAG
   132901 ATGCCATCAC CTGCCTGAAG CCTTCCTTCA GCAAGCTCCC AGCTGGACTA AGCCTTCTGC
   132961 TGGTCCCCTC TCAGGGTCCC ATTGTCTCTG AGTCCCCAGC AAGCTCGCCA GACCTGTGCC
   133021 CATGCTCAGC GAGTGCCTGT GGAAAGGCAG CATCTCTCAG CCCCAGTGAT AGAAGCCGCC
   133081 TCTAACCCAC CTGACTGAGA AGGTCATGTG TCCTGTCACA CAGCTGGGGC TGCAGGAAAA
   133141 AAGGTCCCAG GACGGAACTG GGGCCCTCCC ATCCCTTTGA GGTTAGGGTT AGGGTGCAAG
   133201 AGAGCAGCTG TCAGCGGACT CACTTCCCAT CCAGGAATGG AGCCCGGGGG ACAAACGCCC
   133261 CTCCGGCCTC CTCTGATACC CTGCTGATGC TCGCTGACCG CCAAGTCGAT CAGAAAGCTG
   133321 GCCCGTGGGG GAGCCCGCTG ATGTGGGCCA GGTGGGATTG GGGGAGAGAC GGGGCTGATC
   133381 CTGGGCTCGG AGGGGCCACA TCGACACTGG CCGGCTCTGA GCTCCAGGAT GACACACTGC
   133441 AGCAGAGACG GCACAGCGCC CCGCACTCAG GGGAGTTCCG TCCCCCAACA ACGGGCAGGG
   133501 TGGCTGGGGA GGCTTCCTGC CCTGCGGAGG CAGGGCCTGG GGAAGAAGGC CTGTGGTGGG
   133561 GGTGCTGACC AGCATCTGCA TCCACAGTAC GTTCAGGAAT TCACCAATGA GACGTGGCGG
   133621 ACGCGAACCG GCCAGCCGCT GCCTGACCAC CTGGTCCTGC TTGTGTGGTC CCTCATCGTG
   133681 TCCCTGTATC CCCTCGGGGG CCTCCTGGGA GCGCTGCTCG CCGGGCCCCT GGCCGTCACG
   133741 CTGGGAAGGT GAGTGCTTCC CACGGACCCC CAAGTTCCTC TCAACAAGGG GCAGCCCGGT
   133801 CCATGGGCTG AGGGGTGGGG GCAGGTCACC CAGCAGGCCC AGGCCCGGGT CAGCTCTGCA
   133861 CCGGCCCCCG GCTCTGCCTG CCGTGTCACC GAGAAGCCCA CGTTTCCCGG GGACGTGGTA
   133921 GAGGGAAGAG TCCGTGCTGG GAGGGAGAGA GGACCCACGT CTGACAGCGG AACGCAGCGC
   133981 AGCGCAGCGC AACGCTCAGC AGGGTCCAGG CCTCTCTGCC CATCACCAAC TCCCGGCATC
   134041 TGTGCAAACT CATGTCCATC GAGTCAGTGA TGCCGTCCAA CCATCTCATC CTCTGTCGCC
   134101 CCCTTCTCCT CTCGCCTTCA ACTTTTCCCA GCATCAGGGT CTTTCCCAAT GAGTCAACTC
   134161 TTCGCATCAG GTGGCCAAAG TATTGGAGTT TCAGCTTCAG CATCAGTCCT TCCAAAGAAC
   134221 ACCCAGGACT GATCTCCTTT AGGATGGACT GGTTGGATCT CCTTGCAGTC CAAGGGACTC
   134281 TGAAGACTGA GTCTTCTCCA ACACCACAGT TCAAAAGCAT CGATTCCTCG GCGCCCAGCC
   134341 TTCCTCATGG TCCAACTCTC ACGTCCACAC ATGACTCGTG GAAAGACCAC GGGTTTGACT
   134401 AGACGTGACC ATGAACAGGT GCTTTCTCCC CGAGGACCCC TTTGTAGCCA CCTGAGGCAG
   134461 TTCTTGGGTC GAAAGCAGGA GACTGACTGA GGAATGGAAC ACTGTGAGAG CACAGGGGGC
   134521 CCTGAGGCAG CTCACCGGAC GGAAGGAGGT GCTCAGAAGC CTGGCCTGGG GAGGGCGGGC
   134581 CTGCAGCCTG GGCTCTCCTG GAGGGGTTGG GGCGGGGGTC ACCTTGAGCG CATCAGCTCC
   134641 AGCCACACTC CGACTGCAGC GTCTGCACTC GGGCTCAGAG TCCTGGGAGA CAGCTTGTTA
   134701 CTGGCCGAGA CGGCGGGAGA GAAGGCAGGC CAGGCTCCCA CCATCCCCTC CTTGTCTGGC
   134761 CGCCCAGCAC CCGTCAGCAC CAGTCTCCTG TATCTTCGGC TCCCCACGTG TGCCGCCTCA
   134821 CGGTACCCAG TCCCGCCCTT CCTGAGCCCG CCCAGGGCAC TGCCTCACCA CAGCCACCAG
   134881 CGCCGACACA ACCGAGCGGA GCTGCCCGCA CGCGGGGTTT CCACGAGGCA GCCAGCGTGC
   134941 CAGCCCTGCA GCCCTCTCAA TATCCTGCCA TCTACACGCT GACGGTAAAC TTAACTGCCC
   135001 TCAAGACCTC TCACGGCAAG AGAGACCAAG AAAGAGAACA GACAGACTAA TCGAGGGAAA
   135061 GGAAGCTAAC GGGTGAACTT AGTTTAGAGC ACAGGACCCC GAGCCTTGGA AACAAGGGAG
   135121 GGCTCTGCTC CGGGGTTTTG GAGCCGCTCA CGCTGTCGCC TGCCTCGCTG ACGTCCATGC
   135181 TTCGGTCTCC CAGTCCGGTA TCGGGTCAGT GCTTCCAGGG GCTGCAGCTC TTTGCCCACC
   135241 AGGGTGACCC CAGTCTTTGC GCTGAGTGGA TGCCACAGTC CTGCAGGCCT GGGTCCTTTA
   135301 GCAGGCTCTA CCCTCTGAGG ACACCAGCTT CTGCACCACA AGGCTCCTGA GATGACGCCG
   135361 GGTGCCGTGG GCTCTCATCC GCCGTTACTG AGGTAGCCTC CACTGTCAGA AGCAGAAGTG
   135421 CACAGGACGG CGTGTATTTA ACAGAAGCAT CAACTGCAAG CAACAGAAAA CCAGGACTCA
   135481 GCTGGCTAAA ACAACAGCCA CACCCCCAGT CTGATGTTTC TCCGCTACCA GGGCAAGGCG
   135541 ACCAGTCGGG AGTTATTTCA GGTTAAGAAG ATAATGCTCT TGCCTGGAAA GTCCCATGGA
   135601 TGGAGGAGCC TGGTGGGCTG CAGTCCATGG GGTCTCGAAG AGTCGGACAC GACTGAGCGA
   135661 CTTCCCTTTC ACTTTTCACT TTCACGCATT GGAGAAGGAA ATGGCAACCC ACTCCAGTGT
   135721 TCTTGCCTGG AGAATCCCAG GGACGGGGGA GCCTGGTGGG CTGCCGTCTA TGGGGTCGCA
   135781 CAGAGTCGGA CACGACTGAA GCGACTTAGC AGCAGCAGAA GATAATTCAC TGAAGTTGTG
   135841 GCTTTGCTCC AAAGTCCAAG GTCTTGCATT CTGATTCTCT GGAGGCACTC TCAGCACTAC
   135901 AGTCTTCCCA GTCTAAAGGG TCAAAGGGCA GAGCATCTGG CAGTTGGTCT GGACCCAGTA
   135961 GAAAACACTC CCCTCACAGG ACCCAGGTTT GCAGATCACC CAGGTTTGCA GATCACCCGG
   136021 GGTAGGTGTC AGATCACGAC ACTCACCGTG GAACAGGCTG CCTCCAAACT GGAAAGAAGA
   136081 GATTTTCCCA TCCTTTTCTT TTTTTTGAAT TACAAGCCGC CTCTGGCCCG TTTCCCCAAT
   136141 CAGGACCTGA GCTGCAGGAT CTCCTGCCAG CTCTCCTGGT GACCTCAGGA TGGTGCCTCC
   136201 GAGCGCAGCG TCAGGAGCCC AGAGCTGAGG CCTCCTGTCA GAGGAGCCGC CGCCGTGCCC
   136261 AGTGCCCCCT GCCCAGTTTG GCAGTCTGTC CTGCCGAACC AGCTGGGCAG GGGCCGTCCA
   136321 GATGTCCTGT TCTGGGCAGT GACTGTAATG AATGGAGGAC ACGGGAGGTT ACCTGGCTTC
   136381 CCTTCCTTTC CTTGCCAGGG TTTCACTGGG TCTGAGGAAT CAGGTATTAG GCACTTGGCT
   136441 TTACAAAGGA CTTTGAGGAG AGCGGTGCTC AGTCTGTAGG GATAAACCCA TAAAATATGA
   136501 GTTCTGTCCA TTCAAGCTGT GGTGGAGGCA GAAAGGGCAG TAATCTAGGG GTGTACTGGA
   136561 GACGTGGGGC TTCCCTGGTA GCTCAGATGG AAGAATCTGC CTGCAGCGCG GAAGACTAGG
   136621 GTTCAATCCC TGGGTTGGGA AAATGCCCTG GAGGAGGGCA TGGCAACCCA CTCCAGTACT
   136681 CTTGCCTAAA GAATCCCATG GACAGAGGGG CCTGGCGGGC CACAATCCAC GGGGTTGCAA
   136741 AGAGTCAGAC ACGACTGAAG CAACTTAGCA GGCACCACTG GGGCTGGGGG GTGGGGGTTG
   136801 GCCCCTGGGG GCATCCCATG GGCGACCCCA GCTGCAGTGG CCGGCGTCAC TTCTGTGCAG
   136861 GCAACTCACA CTCCACACAC ACACACACAC ACACACACAC ACACACACAC ACACGGGCGT
   136921 GATCAGGGCT GGATGTGGAT GCGGGGAAGG GTCCCTGGGC GGGGGGGGGT CATCCTTGGC
   136981 ACTGAACCTG AGCCTGCCTC GCCTGTGTTC CGCTTCCCCA AGGAAGAAGT CCCTGCTGGT
   137041 GAACAACGTC TTCGTGCTGG CCGCCGCAGC ACTGTTTGGC TTCAGCCGCA GAGCAGGCTC
   137101 CTTCGAGATG ATCATGCTGG GAAGACTGCT CGTGGGCATC AGTGCAGGTA CGGAGTGGGC
   137161 CTGGGGGTCC CCTTTCCTTC CCGTTGCTCC TTATTCCTTT CACTCATTGA TCTCTTTTCC
   137221 AGGCGTGCTT CACTTAGTCA TGATTTATCT TAAAAGGCTC ATATAACTAG ACAGCTGAAG
   137281 TGGATCTAGA AAAAATGGAA ACACTCTGCA GGGCTGGGAG GACAGACATC CCCAGAAGGC
   137341 TAAGCCGGGG GCTTCCTGGC GGTCAAAGTG GAGAGGCATG TAAGAGGAGA CCTCTGGTCA
   137401 TCCCTACAGA AGCCGAGGAG CCTGCCAGGG ACCTGGGGCT CCTGCAGGGG TGGGGGGTGG
   137461 AGCAGAATCT TGAGCGTGTC CACCTGGGCT TTTAGGGGCG CCATCATCAG TCCCCTTGAC
   137521 ACCCTACTGT GTATACAGCC GGGTGCCGAT GTCCTTACTA GGCGTCTGTT CCTGTGACAC
   137581 AAAGCGCTCC ACAATTCAAT GGCTTAAAGC CAGCAACGCT GATTCACTCA CGGTTTCTAG
   137641 GGGTGAGGAA CCCAGAGTGT CTTAGCTGGG GGGTCCCGGC TTGGGGCTGC TCGGGAGGCT
   137701 GTGACGTGCC AGGCGGGGCT GTGGTGAGCT GAGGTTTGGC CGTGGCTGCT GGGCCTGCTG
   137761 CTGAGATGCT GTCCCCCTGT GTGCTGTTTC CCGGGAGCTG CGCTCCCAGC CTGCGCGGGT
   137821 CTCCCAGCAG GGCTGCTGAG TGTCCGCACA GCATGGCAGC TGGCTTCCTC CAGGGGAAGT
   137881 GATGGGTGAC AGAGAGCCTG TGTGTGTGTG TGTGTGTGTG TGTGTGTGTG TGTGTGGTGT
   137941 GCGCACACGC CTGTGTGTGT GCATGTCTGT GTGTGTGTGT GCGCGCGTGT GCGCGCGCCC
   138001 ACCTGTGTGT GGGCGCGTGA GGAGCGAGTC CCGGGAGGCT TATGGCCTGA TCTCAGGAGT
   138061 CACACACCAT CCGCTTTGCC ACAAAGCGAG TCACTAACAA CAGCCCACAC TCAGGGACCT
   138121 CAGGGACAGA GGGGCCAGGT CAGACGGTGC CTTTGTGCCC CAAGTTCCTA GCACAGAAGG
   138181 AACCCCTCCC TCAGTGTCTG CAGGAAGAGC GAGGGTACCT CTGAGAATTT CTGGCCATCA
   138241 GCGCAACCCT GCTCCTCTCA GCTCCCCCAG CCAGTGCTCA GAGAGGCAGG GCCTTGTCAC
   138301 GGCCTGTTTC CCCGACCTGA GGGCAGGGAG GGGCTGCAAG AACCCTGCAG GAGCGCTCCA
   138361 GCCCTGTTCC GTGTTCCCTG GGCAGATGAA TGGTGCCTGG GCCGCCCTCT GGGGTGGGCG
   138421 GCAGGTGGTG GGGGGGCAGC GCCTGCCCGT CCCAGTGCCC TACAGGGTGC TTGGGCACCA
   138481 GATGCCTCCC TGGGGCAGGT GGGAGGGGGA CAGCCTACAG CTGATGGGTG CCGGCTCCCT
   138541 CCTGCCCCTC CCACTCCCCA AGGGTGACCA GGGCTTCTCT TCCAGGAGTA CTGTGGGAGG
   138601 ACTGGAGTCT TGCCTGCCCG ACAGCAGGGA GGGGCGGGGG GGGAAGCCCC ACAGGGCTCA
   138661 GGCTGAGGGA GCAGCACTCG GGCCGTGGAT GGGAAGCCAG GGCGCCAACG GGGGCGGGGG
   138721 AGCCCGCCCC GCCACTGACT GTCACCCTGC ACGGCCAGGT GTAGGCATGA ACATCCAGCC
   138781 CATGTACCTG GGGGAGAGCG CCCCCAAGGA GCTCCGAGGG GCCGTGGCCA TGACCTCTGC
   138841 CATCTTCACC GCCCTGGGGC TCGTGATGGG TCAGGTGGTC GGACTCAGGT ACACGCCCCC
   138901 CCACACACTG AGTGGTTAAG GGGCAGCCTA AACCTCCCCC CACCCCCAAG TAGGTTCAGA
   138961 CACGGCTTCC TTGAACGAAG GCGTTGAAAG CCGTCCATGG GCTTCTGGCC AGCGTGCTGC
   139021 CTGTCAGCCT CTTCCAGCCC CGAAGGACCA GGCAGCAGGG ACAAGTCTAG ACAGAGGACG
   139081 GGGCAAGTTT GGGCTTTGAA AGGGAGCGTG TGCTGTTTGT CCCAGAAAAG AGAGGCAAGG
   139141 GCAGAACCTG GTGCCCTGGG GAGGGCCCTG GAGAGAGGAG TCGCCAGGGA TAAAGGGAGG
   139201 CCATGGCCCT TCCCTGCCAT GAGTCCCTAG CTGGGTGTCC GACCCAGAGC TGGCTAGGAG
   139261 GAGGCACAGG GGAACGGGGA CGCTGCCCTC GGGCGCGGGA GGCAACAGGG CTCTGGCCAG
   139321 GCGGCGCTGG CCCAGCCTCT CCTGTCTCCC CAGGGAGCTC CTGGGTGGCC CGCAGGCCTG
   139381 GCCCCTGCTG CTGGCCAGCT GCCTGGTGCC CGGGGTGCTC CAGCTGGCCT CCCTGCCCCT
   139441 GCTCCCCGAA AGCCCGCGCT ACCTGCTCAT TGACTGTGGA GACCCTGCAG CCTGTCGGGC
   139501 AGGTGAGCCT CTGGCTTGGG CCCCCGGACC ACGCTTGGCC ATGGGGCACA TGTGGCCAGA
   139561 GCATGTGGGT CCTCCTTTCT CACGTAGGAA AAGCTGTTGC TCTCTCTGCG CCTTAATTTC
   139621 ATGATCCATC CGTCCCTTCG ATGCTCTTTA TCAGGGGCCT GTCCTGAGTG GCAGGGCAGT
   139681 GGGAGGGAAC AGACCCAGCC CCTGCCATCT GGGAAACCCC AGCGGGGTGT GAAGAAAGAG
   139741 CCCGCCACCC CCCCACAGGC AAGATGATGA AACCCCGAGC AAGGGCTCAA GGGCCTAATG
   139801 CCAGCTAGAC TGGTGGGCTC ACCTGCTAGC CAAGGCCACA GTAAGCATGC CCAAGGAACA
   139861 ATCCCCAAAC CTCCAGCTTA AAACAGCAAT CCTTTACGAC GGCCTCCTCT ACTCATTCAC
   139921 TTGTTGAGCT GGGCTGCAGG ACCCTGCTGA TTTCAGGGTC AGCGGGGGAC CAGCCAGTCC
   139981 AGCCTGCTTT TGCTGGCAGT TTTGCTCATC TTGGTCACTG TCGAAGGTCA GCGGGGCATC
   140041 GGCTGATCTA GGACCGTCCC AGCTGGGCTA ACCCTGCGGC CTTGAGCGAG TCAGGGGGTA
   140101 GAGCCAAGGG GCGGCGCACA CATGCCCACT TGGTGGGAGC AGCTGCCAAA TCCCGCAACC
   140161 CCAGGGGCTG CGTGGGCACG GGGACCCCTG GAGAGCCGGG GGCGGCAGTG GCAACCGGCC
   140221 ACAACTGTGT CCTGTGTGAG GCACCCGCAG ACCACCCGGG TTCTTAAAGC CTTCCTAGTC
   140281 CGTGGGGCTG TGAAGTGACC CGGAGCGGGG TTTGGGGAGC TCACTATGGG GGCCATCTAG
   140341 ACGCTGGGAA CTCAGCCCAG TGCCCTCTGC CCCTCCTCCT CCCCGGTCCC TCCCCTACCC
   140401 CATCCTTCCC CTCCCCTCCC CTCTCCCTCC CCAGCGCTGC AGCGGCTGCG GGGCCCCGCG
   140461 GACCTGGCCG GGGAGCTGGC CGAGCTGGAG CAGGAGCGTG CCGTCTGCCG GGGCGGGCGC
   140521 GCGCGGCGCC CGTGGGAGCT GTTCCGGGAG CGCGCGCTGC GGCGGCAGGT GGCCAGCCTG
   140581 GTGGTGCTGG GCGGAGCCAT GGAGCTGTGC GGGAACGACG CGGTGAGACG GCCGCGCGGG
   140641 GCCGGGGAAT GCGAGCGGGC GGGGAAGGCG GGGAGCCGGG GCAGCTGCGG CCGGGCGTGA
   140701 TGGGAGCCGG CGCGCAGCGG CCCCTCTCCT CGCAGATTTA CGCCTACGCG TCGGCCGTGT
   140761 TCAGCCAGGC AGGGATCCCG CAGGACAAGA TCCAGTACGC GGCCATCGGG ACCGGGGGCT
   140821 GCGAGCTGCT GGCGACGCTG CTCAGCGTGA GTCTGCTGGG GCTGACCCCC AGCGCCTAGC
   140881 CCTGCGGCAG ACTCTCGGGG TGCTCACCTT GGGGATGCCG ACCGTCGGGG TGCTCACCTT
   140941 GGGGGTGCAG CCTGTCGGGG TGGAGACCCT CGGGGAGCTA AGGCTCCAGG CACCACAGGC
   141001 CTCCAAGCTA AGGCACTTCC ACTTCAGGTT TCTGTGTTAA AATGCAGGGA GCAAGCGAGC
   141061 ATTTATTGAA CACCTACTGT TTGCCAGTTG CTCACACCGC CATTTTGAGA TGGAGAAACC
   141121 CAATGGGTAT TGAGTGATCG CGACCCTCTG CGAAATTAAT AATGTCTTAA TCCACCAAGT
   141181 GGCAAGCCGC GCCCACCACC TTCCCCAGCT TCTGCATGAT GCCCCTGCCC ACTGCGGGCC
   141241 GGAGGCCTAG GGGACCTTAA CCGGGGCTGC AGCGGTGAGT CAGCCAGGGC TCCTTCCCTT
   141301 CGCAGTGCCT GGTGATTGAG AGGGCGGGCC GGCGGGTGCT GCTGACAGGG GGCTACGGCC
   141361 TGATGACCTG CTGGGGGAGC GTCTTCACGG TGGCCCTTTG CCTCCAGGTA GCTGGGCCCT
   141421 TTGGCATGGC GGGTGAGGGC GTGGGGGTGG GGGTGGGGGA GGCTGGGCCG CGCCCACTTT
   141481 CCCTTCACCC CTCCCCCTGC CCCTCACGCA GGGCTCCTTC TCCTGGATGG CTACCTGGCC
   141541 ATGGCCTGCA TCTTCGCCTT CATCCTCAGC TTTGGCATCG GCCCTGGTGA GTTGGGGCCC
   141601 CGGGGGCTCC CTCCTCTGGG CCTGGCTGAA GGACCAGGGG TGTCTGGGTG AAGGATGGGT
   141661 GGGTGTGCCT AACCCTGACT CCCTCACCCC TGCCTGGTAC AGGCTTCTGG GAGGGCGTGG
   141721 CTGGAGGAAG GCTGGGGGGG CCCACTTTCT TGTCGGGGGC GGGTGGGGGG GGGCCAAGGT
   141781 GGGGGTAGGC AGGCCAGGGA GCCCTGACTG GCAGCCCCCC GTCCATACTC CCTCTTCCAG
   141841 CCGGAGTGAC GGGGATCCTG GCCACGGAGC TGTTTGACCA GATGGCCCGG CCTGCTGCCT
   141901 ACATGGTCTG TGGGGCGCTC ATGTGGACCA TGCTCTTCCT GGTGGGGCTG GTGTTCCCCT
   141961 TCATCATGGT AGGCCTGCCT GCCCCTGCCC CCCCGGGAGC GGGGGGCGGC CTGCCTTTGT
   142021 TTTGTCCCTG TCAGTGTGAG AACCCCCCGC CCCGGGGAGG CTCCATCCAT CCAGGGAGTG
   142081 TGACCCTGAA TGGGGATGGG GCTCACCTGA GCCAAGAGGG CGGAGGCCCT CACAGGGCCT
   142141 GTGCTGGGGC CTCCGGTGCG GCGGGGGCTC CGTGGGCCAC AGCAGGCCTC GGGTCTCTTG
   142201 CAACCCCCAG GAGGGCTTGT CGCACTTCAT CTATGTGCCG TTCCTCTGTG TCTGCGTCTG
   142261 CGCGGCTGTG TACTCGGGCA TCTTCCTCCC CGAGACCAGA GGCAAGAGCT TCATGGAGAT
   142321 ATCGGAGGAG CTGCACAGAC TCAACTTCCC CGGGAGGAGC CGAGGCCCGG TGTGGGCTGG
   142381 CCCCGAGGTC GTCCGGTCCA CGGAGCTGTA GCTCGGCCAG CACCGCGGGC CGGCCCCGGG
   142441 CCCTCCCCCT CCTGTGGAGC CCTCGGTGTG CAGGCCAGGT GCTCAGCCTC AAAGAGACGG
   142501 TTTCGGGGGC CTCTCGGCGC CCCGTGTCTG GAGGCTGTCG GCAGGAAACC AGCAATGACA
   142561 AACTCAGAGA AACGCAGGCG AAGAAAATAC AGCTTGTGAA GCCTTTGAGA GGGGCGTGGC
   142621 CACGAAAGGA TTTTCTGAGG AGTTGATTTT TTTTTAATCA AGTTTTTTGA GGTGTAATTT
   142681 ACATACAATA AAGTGAATCC ACAGTAAGTG TACATCCGGT GAGTTTTGAC AGGTGTGCAT
   142741 ACCTGCGAAC CACGACCACG ACCAAGGGAG ACTGCTCACC CATCCCTCCT GCCTCTTTGT
   142801 GATCAGTACC CCCCACCCCA ACCTCGGACC TGCCTTCTGT CACTGGCTGT TCCTTTTCAG
   142861 ACAGTTTGAT AAAACTCCAC GCCGTGTGTA TGCGTCTGTG TTTGGTCTTG CTCCAGATAA
   142921 AGGCTTTGAG GTTCACGCAT GTTGTTGCGT GTATTCGCAC ATACCCCTTT GTGTGGCTGA
   142981 GTAGCATCTC GCTGTATGGA TGTACCATAA TTTGGTAACC CATTTCCCTG TTTGTGGACT
   143041 TTTGGATTGT TTTTCATTGT TGGCCACGAT GAATAAATCT GCTGTGAACA TTCCTGCACA
   143101 AGTTGTGTAG ACATGTGCCT TCATTTCTTT TGGGTAAATG AATTGCTGAG TTTAATAACG
   143161 AATGCATGCT TACCTGTAGA AGAAACTTTT CCAGGGTGAT GATACCGTTT TACATTCCCA
   143221 CCAGCCGTCC ACGAGACTTC TCGAGTCTCC AAGTCCTCCT CAGCACTTGG CATCTTCAGT
   143281 CCCTTCAATC CAGCCATCCC ACTGACTGTA GTGGCACCTC GTGGTGAGCA TCTTTTTATG
   143341 TACTAATACA AATCGCACGC CATTCACAGA TCTCCTTTGG TGAAGAATCT GTTCAAATCT
   143401 TTTGTCCATT ATTTAAAACA AAAAAAATAT TTTTTTGAGC AGTTTTAATT TGACAGCAAA
   143461 ATGGAGAGGA AAGTACAGGC ATTTCCCGTG TGCCCCCGGC CCCCACACAT GCACAGCCCC
   143521 TCTCATCAGT GTTCCCCACC AGAGCGGATG TCTGTTGCAA CGCACAACCC TATGTTGCCG
   143581 CCTCATTATT ATCCAAAGTC CACGGTTTAC ACTGGGGTTT TCTCCTCAGC ATTTTGCATG
   143641 CTAATTTTTA GCTACTTTTC CATGCTAATA TTTTCCATGC TGATTTCCTC TGCTGTACAT
   143701 GCTGTGGGTC TACACAGGTG TATGGTGACG TGCATCCACT CTCTGCTCTG TGTGGTCACC
   143761 CCTTTCCTGC GCTGCGCACC CCGTCGATCA CTGATCTTTT TACAGTCTAC AGTGGTCTCC
   143821 AGAACGTCAA ATAGTTGGAA TCCTGCAGTT ATGCGGCCTT TGCAGATTGG GTTCCTTCCC
   143881 TTAGTAATGT GCATTTAAGT TTCTTTCCTG TCTTTTTATA GCTTTTAAAA GTTCGTTTCT
   143941 TTTTGCACTG AGTAAAATTC CACTGTCCGG ATGTCCCACA GTTCATTTTT GGTTGCTTTT
   144001 GGAAATTATG AGTGAAGTAG CTACACGCAT CCATGCGCAG GTTTCTGTGT GGACATACAT
   144061 TTTGATCCTT TGGGTCAATA CGAAGAAGCA TGATTGCTGG GTCATAGAGC AAGAGTCTCT
   144121 TGAGCTTCGT AAGAACCCGC TAAATGCTCT TCTGAAGTGG CCATGCGTTC TAATCCCCAT
   144181 CAGCAGCGAG GGGAGCGTTG CGCCACACCC TCATCAACAT TCGGAGTTGT CAGTGTTCCG
   144241 GATCCCGGCC GTTCTGTTTG TTAATAACGG TGCGGGTGGC ATTCTGCTGT GGTTTGCACT
   144301 TCCCTGAGTT CACACCTGGA GCGTCTTTTC ATACGCTAAT TTTCCATCTG TATATACCTT
   144361 CTTTGGTGAG TATCCCTTTA AAGTGACCAA TTTTTAAAGT ATTTTCTTTT TTAAAAAAAA
   144421 TTATTTATTT TTGGCTGTGC TGGGTCTTTG TTGCGGCATG GGCTTTTCTC GAGTTGCGGT
   144481 GCGTGGGCTC CTCACCACAG CGGCTTCTCT GGTTGTGGGG CTTGGGCTCC AGGGCGAGCA
   144541 GCGTTCAGTA GTTGGGGTGT GTGGGCTCAG TAGTTGTGCT CCCCCCGCCC TGGAGCACAG
   144601 GCTCAGTAGT TCTGGCTCAC GGGTTTAGGT GCTCAGCAGC ATGTGGGATC TTCCTGGACC
   144661 AGGGATCAAA CCTGTGTCTT CTGCTTTGAC GTAATTTTTT TTTTTTTTTT TTTTTTTTAC
   144721 CAGTGAGCCA CCAGGGAAGC CCCTGTTTGG TCAATTTTAA AAAATCAAGT TGTTTGCTTT
   144781 CTTATTGTTG AGCTTTAAGA CTTCTTTGTA TATTTTGGAT AATAGCCTTC AATCAGATGC
   144841 ATCTTTTGCA AATATTTTCT CCCAGTCTGT GGCTTGCCCT TTCGTCTTCT TGACAGTGCC
   144901 TTCCGCAGAG CAGACGTTTT TAATTTTAAA AAAGTTGAGC TCATCAATTC TTTCATGGGT
   144961 CGTGTGGTAT CTAAAAATCG TCACCAAATC CATAGTCGTC TAGATTTTCT CCTAGCGTCC
   145021 ACCAGTGTTT TCAGCTGCGC CCCACAGCTT GGAGGATCTC AGCTCCCCAA CCAGGGGTTG
   145081 AACCCCGGGC TCTTGGCAGT GAAAAGGGCC AGGCCCCAAC CACTGGGCCT CTAGGGAACT
   145141 CGATTATTCA TTTACTGGTA ATGGAGGTGC AGTGGTGCCG GCATCGTTCA CTGAAAAGAC
   145201 CACTTTCCCC GTTGGATTAC CTTGGCACCT AGGCACAAAA GCCAGCCGGC CACTGTTGTG
   145261 TCATGAAGAC CTTGTTGGCT TCCACAGGGA GCAGTGACCG CCAGGTTAGC AGAAGCGGCG
   145321 GGCAGTGGGC TCTTCAGGGA GTGAGAACTC TCTGAGCCGG GCTCAGGGGA GGTCTTGTGG
   145381 AGAGGTCACC TGGGGCTGGC TTCCTGCGGA CAGGCCCCGC TGGGGCTCCC TTGGAGGCAG
   145441 GAGTGTTGGA GGATGGGAAT GAGGGCCTCT GGGTCCAGTC ACTGTAGTGT TTTCTGGAAG
   145501 GCAGGAGTCG GCACTGCGGG AGCCCTCCGT GGGGTCTCCC AGCTTCTCTC TGCCATCCAT
   145561 CTGGCCCAAC TTTGCCTCTG CTGACCGGCC TCCCCGGATC CTCCTTGGGC TCCAGGGGGC
   145621 ACTACTGACC TTGCGATCCC GAGGTGTACA GGCTAGGAGC AGCGCAGGCG TCCGGCTGTG
   145681 TCTCGGGTCT GGGACTGCAT CGGTCACACT TCAGCACGCT GCTCCCCGGC ATGGGCCGCA
   145741 GAGATACACC CAGCCCAGGC CCAGCCCAGG CCCAGCCCTT GGGCCATGTC CCGCTTGCCA
   145801 CCCACCCAGC TAAATTGGCT GTAAAAGTGT GGGCTGGGTG TTGGGAGTCC TTGTTGCCCA
   145861 GGGAACGCCC CCAGCGGGGT AAGGAGGCAG GGATGGGACC CCGCAGATAG GAGAGGCTGT
   145921 GCCAGGGGAG GTGGACGGGA CCTGGCCTGG CCTTGGCTTT GATGGGATGG GGGCGGGGGT
   145981 GGGGAAGGGA CCAGGCCGCC GGGGAGGGAA AGCCCAAGGC CACCATCAGG GTCAGGCCCG
   146041 TTAGTCCGTT TGCTGCTCCA GGACACGTGG TGACAACGCA GTAAGGTCGG GGAGCGTTTG
   146101 CTGAGCACCT CCTGCATGCA GGTGCTTTGT GCTGGTACTT TAATCTCTCC CATCTTCACC
   146161 CACGTCTGCG GGAGAGGAAT TCCCCTATTT TGAACTTTTC CGGCTGAGAC TCAGAGAGTT
   146221 CGTTCACAAG GTTCAGCCCA GCTCGCCCCC TCTGAACCGT GTCCCGGCCC TGCTTTGGTA
   146281 GCATGGTGGT CTCCTGGCGG ACACCCCTCT TAAAACCCTG TCCCTTCAGC TGGGATGGTG
   146341 GCCCCCACGT CTCCTTCTGC TATGACTAGA GGGGAGGGGG TTGACTTGGC TGGTCTTTGC
   146401 TGCACCTTTC ACCACACTCA GCAAACAAGA GCACAGGGGC TTGCTGAAGG CTCTGCCCAG
   146461 CTGGATCCTT CCGCGAGAGA TGAACCGTGA GTGCTGGGGG AGGGACACCA GGGAAGGAGG
   146521 CTGGCAAAGG CGCCCTGGGA GCCGCTGGGC AGTGGGCCGC CCATGGACGA GGACTGGAGG
   146581 ACAGAGTCGC CCTCCCCGGG CACCCCTCAC AGCCTGGCTG ACTCAGGCCC TGCTCTTGGA
   146641 GATGTTCAGA CCTGGGCCCA GCTGCCAGCC CTCTGGGCAT GCTGGGTCCC CCAGAGCTGT
   146701 CCTCCACATC CTGAGGTTTC CTCCCCTCCT GGTCTCTGCC TGCAGCCCTC ACCTGTGGGG
   146761 CACGGCTCCT GGTGGTCCCA TCTGACTGCC CATCGGGCAG TCCGGTCCAG GTTCCAAGCA
   146821 GGGCAGGAGG AAGGGCTCGG GGAGGCGGCC CCATCTGCAG GCAGCTGCTC CCTGCGGAGT
   146881 CTGCACATCA CGTGGACACA GCTGCCCGGG GGTGGGGGGC GGTGACAGTG CCCGGTTGCC
   146941 AGTGGCTCTG GTGGTGAAGG TTCTAAGCAA ACAGATGCTG CCGGTGAGGA GGGAGAGGAT
   147001 GGTAGGGGGG TCCAAGGCCT CCTGGCGCGC AGGGCCGGTT ATTGTTCGGT AGCTAATTAC
   147061 AGAGCCCCTG GGGACGCAGG GGTGATGCTG TTCTATTGCT CCTAGAACAA ATTACCACAA
   147121 ATTGAGCAGC TTGAAACAAC ACACGTTTAT TATCTCACAG TTTCTGCAAG TCATCCGTTG
   147181 AGTACAAAGT GACTGGCCTT CCGCTTCAGG CAAGTCAAGG CATCTCAGGA TCAACTAGGG
   147241 AGGAGCCCAC TTCTGAGGTC ATTCGGGATG CTGGCAGAAT TCAGTGTTGG CAGAATTCAG
   147301 CTCCGGATGA CTGAGGCCCC TTCATCTACA AAGCCATTTA TTTACAGCAC TTCTGAGTCC
   147361 TTCTGCTTTG AGGCTTTCTG AATGCCCCTT CCGTCTCATC TGCGACTTGA GCTGGAGAAA
   147421 ATTCTCTACT TTTAAGGGCT CATGTGATTA CATCGGCCCC ACCCAGATAA TCCACGATCA
   147481 TCTCCCTACT GTAAAGTCTG TAACCCTAAT TACATCTGCG AAGTCCCTTT TGCCGCAAAA
   147541 TTTAACATCT TCACAGGTTC CAGAGATCAG GGCGAGGTCG TCTTTGGAGG CCCTCTGCCT
   147601 GCCACCGAGT CATGTGGCCC AGAAGTCATG AGCCCAAAAA AGACAGTGCC CCACCGCATG
   147661 GAGCCTAGCA AGGAAGCAGT GTGGTAGCTC AGATGGAAAC AGGGTGGCGG CCTTGAAGGA
   147721 GAGGGCTTTC CCGAGGAACG GAGCCCGAGG CGGATGAGCG TTCCAAGAGC AAGGCCCAAG
   147781 CCAGGGGCTG GGAGCACAGC ATCGCGGGGC AGCACACAAG ATTCACCGCC GAGGAGGGCG
   147841 GTGTGAGCCG CAGGGTGGGG ACCAGGCCAG CCGGGGCACT GTGACAGCAC TGCCCCGAGG
   147901 ATCAGACGGA CCATCGCCAG AAGTTAGGCT ACTCGATCCC TACCACGGCC CTCTGTAAAG
   147961 GGGGCTCTAC CGTCATGCCC AAATTACGCA TGGGGAAACA GGCTCAGAGA GGTGAGCCAG
   148021 GTGCCCACGC TAGGAAGAAG TGGGACCGGG AGGCTGCCAC CTCCTCCGAT GCCCTTCTAC
   148081 AGACAAAGTA CTGACACTCC TGGGAAGGTC AGGGGTGAAC AGAGGCGGTG CTGACCAGGG
   148141 AAGGCTCCCG GTGCCACAGT AACAGCCTGA GGGCCACAGG GCTCACCTAC GCATCATCGG
   148201 TGCAAGTGTC TCTGCCGGAG GTGGGGGCTT CACCGTGTCA CCCACTTCCA CTATCAGAGA
   148261 ACCGCCAAGC AGGCACTGGC TACTAAATCT TCTGCTTGGA GTCATTTGGG TCACTTCTCT
   148321 TCATGTATCA CTGGGCAAGT CACATGATCA TATGGATCTG CTGCCCCAGG CAGCTCACAG
   148381 AGACTAGGCG GGGTGGGCGG GAGGGGTGAG GACCCAAGCA CAGTGGAGGG AGGTCCATTT
   148441 CACTGGCAGG CGATCAGGGA CGGGCGAAAG GCAAGCACCT GGATTTGGAC ATAGAGAACA
   148501 GGCTGTGCGG GCTTGCCTGC TGGGGCTTGG GGGAGCCCCC GAGCTGGAGA CGGGCGTGGA
   148561 GGGCATCCGT GGTTAACAGA GACCTCGGCA CAGGTGGCCT GCTGGGGTAA GAGCAGGGAC
   148621 AGAAGGGGCC TTTTACAGAG CATCTGCCCA GCTGGGCCAC GGGACCTCCT GCCTGAGTAC
   148681 GCCTGGTCCC ATGGGCATGG GGGCCCATGT CCAGGCCAGC ATGTGCAGGG TCCCCCTTAA
   148741 CCAAACCATA CCTGCCAGAG ACCAAGGACA GGACCTCTCT GGACAGATCT GAGACTGGGC
   148801 CCAACCAGCA TGCCGCCTCA AGTGCCCAGC AGAGCTCCGC TCCCCAGCAC AGCCCCGTGA
   148861 CCAGGGTCTC CTCAGAGCAG GAGTTGGGCA GCCTTTCTGC TCAGGGACGG CAGGGCCTAC
   148921 AGGCTCAGCC CTGGCCCTGC CCTCTTCCTG CCCTGTCAGG GCTAAGTTCA TTCACTCCTT
   148981 CATTCAGCCA GTATTTAGTC CACGTCTCTC ATATGCCTGG CACCTACGAT GTGCGCCCCG
   149041 AGCTGACCAG CAGTGGCAGA CAGAGACTTC CCCCCCAGGG CTCTGAGAGA CGGCACCCCC
   149101 AGAGGACCTG ATGGGGTGGG CTTCCCTGAG GAGCTGGCAT TTTCAGCGCT GCAGAGAGGT
   149161 AGCCCGGTGG ACTGAAGCTT TGCGGACTGC CTCTGGGCTC CGTGTGTCCC CAGCCCCTCC
   149221 CCTGGGCACC TCCGGGCAAT CGCACCCACT CCAAGAGCTG GGTGCAGGAA GGTCCCTGGA
   149281 TGGCGACGCG CTGCGGCAAG CGCTGCCCAC ATGCAGCAAT GACCACCGCT CTCCATCACT
   149341 CACACGCACA CACATACAGA GGCATGAGCG CGACTGCGGC CCGGGAGACT GCGGACACAC
   149401 AAGGACTCCG TAGAATGAAC TGGGACTCCG CCTGCGCCCT CCTCGAGGGC CAGGGGTCAT
   149461 CTGTCCCGCT AACCGCTGTT CCCAGCACAC AGACATCGCT GGGACCAAGT GAAAGGACTG
   149521 ACACTTCCGG CCGCCCAGCG GAGAACGGCT CAGACAGGGC GCGCAGGGCC AGAGGCGGTG
   149581 ACGTCACCGG CCGGGAGCGC GCCACCGCCC GGGGGCGGGA CCGGCGGTGA CGTCGCGGGA
   149641 GGCGGGCCCA CGTCGGGGCG GGGCGCCGGG CGGCGGTCAC GTAGCTCAGG TTCCCGGGCT
   149701 GCCTTAGCGC GCGCGTCGGT CGAGTCGTGC GTGCCGGTCC CCGCCGCCCC TCGCCATCAT
   149761 GCCGATGTTC GTGGTGAACA CCAACGTGCC CCGCGCCTCC GTGCCGGACG GGCTCCTCTC
   149821 CGAGCTCACG CAGCAGCTGG CGCAGGCCAC GGGCAAGCCG GCACAGGTCT GCGGGGAGGG
   149881 CCGGGCGGGG AGCGCGTCTC CGGGATGGGG CTCCGGGCCG GGAGTGTGGG CGGCTACGGG
   149941 ATGGGGCTCC GGGCCGGGAG CGGCGGGGGC GTGCAAGCCG GCTGACCGCG GCCCCTCGTC
   150001 CGCAGTACAT CGCGGTGCAC GTGGTCCCAG ACCAGCTCAT GACCTTCGGG GGCTCCAGCG
   150061 AGCCCTGCGC GCTCTGCAGC CTGCACAGCA TCGGCAAGAT CGGCGGCGCG CAGAACCGCT
   150121 CCTACAGCAA GCTGCTGTGC GGCCTGCTGA CCGAGCGCCT GCGCATTAGC CCGGACAGGT
   150181 GCGTGGGCGC CGGTGGGCGG GGGGCGCGCG GCCTCGGCGG CACCCGCACG GCCGGCTCAG
   150241 CCTCGCTTCC TCCCTCGCAG GATCTACATC AACTTCTGCG ACATGAACGC GGCCAACGTG
   150301 GGCTGGAACG GCTCCACCTT CGCCTGAGGG CCGGGCCTCG GGTTCCCAGG GCCCGCAGCC
   150361 CTGGCGCGCA CAGATTTCCC GCCCGCCCCG CCCCCCCCCC CAACACCGAC CCCACCTCCC
   150421 TGGAAGGAGC AATAAACGGT GTGGAGACGC GGGCTGCCTC GTTTTTTCTT GGCTTGCGGA
   150481 GGAATCGATG CAGGGCGGGG CCGGTGAATG TGGAACCGAG GCCGGGAAGG GTTATCCCCG
   150541 GAGTCTGCAG CCTAGCCTTT CCACGCCTCA GCCCCCAGTA GAGGGCCCAC ACTTGGTTGG
   150601 CATCCTGCCT GCACCCAGAT CCAGGCATCC AACTCAGATC CGGAACCCTC CGTTCCCTCT
   150661 CCCCACTCCG ACCTCCTGCA GAGGCCCAGC CACCACGTGG GTCGGGGCTG GCTGAGGAAC
   150721 TGGGGGAGGG GTCAGAATCC CAGTAGAGCC GAGGAGGGGC GGGGAGGAGA GAGAAACCTG
   150781 GACTCGGTCG GGGTCACTGC CCCGATGCCC GCCTCAGGGT CGTGATTTGG GAAATCCCCC
   150841 TGTTCTGGAG CTTGGAAACC GTTTTCCAGT GTGGTGGTGG GGGAGGTGCC TGGAAGGTGG
   150901 AGTTCCTGAT GATCCGCCCT GTCCACCCCG GGCCCTGGGG CACAGCAGTT TCCTGCGAGA
   150961 ACAAACTCGT GGTTTGGGTG CCATTCAAGT CTCAGGGTAC AGCAGCTGTC AGATCCTCCA
   151021 GGTGGCTGTT AGCCCCTGTA GGATAGGAAG GTCTCGGTGC CGAGGGGACA GTCGGGAACA
   151081 CCAGTGTACT TGGGGTCTCC TGGCCTAGGT AGGATCCCTT CTCCAAGTGC AGGGGCTCGC
   151141 TCCCTTGTGG CCAGGCCAGT TGCCTTTGGG CCCCACCTGG CGGCAGCTCC TTCCAAATAA
   151201 GAAAAAGTGC AGTCACTCAG TTGTTGGCAC GGAGATGGCC TCCCCCTGCC TCATCAGCCC
   151261 GGGTTCTGGG GCCTCCCCTA TGGACTCGTG CTAGCCCTGA ACCTCAGCCC CTAAGACAGA
   151321 CAAGAACACC CAGAGAGAGG TGACTTAAAA TTCCACGGAA TTGAAGTGAA TTTGGTTTTG
   151381 GAAGCTGAGA CACTGGGGGA AAGGGTTCTA CTGCCTGGGC AGGCCTCTGG TGCTGGGAGT
   151441 GAGGAGCAGG CCTGCCTTTG AGCCACAGTG ACAAGGGCCC CTTTATGCGT GTGGCCACCC
   151501 CAGGCCCTTC TTGGGCAGCT GCCAGTGGCC CTGCCCATGT GGCTTCCCGC AGGCAGGGGC
   151561 AGGAAGCTCC AGGTACCTAG TCCAGGCCAG TAGTTGAGGA CGGGTCAGAA CAACCCAGTT
   151621 CACTGGCACT TTCCACTGGG GCAGCCTGCC AGGGCCAGCT TGCTCCCCTG GATACGCCTG
   151681 AGGGCTGCTC TCCTTAAGTC CAGGCTGAAG CTGGGGAGGC GGGAAGCACT CCATCCCCCA
   151741 GCCCCAAGTC TGCTTCCTGG CTATGGAGGG TTTAGCTTCC AGGACAGGGG ACAGTCATGA
   151801 CCTTAGAAAG GAGGAGTCTG GAGGGTGTGG CCTGTCTGGG GGGGTCATTC TCCCCCCCAC
   151861 AGATGTCTTC AAGCTCCCCT CGGTCTCGTT CTGTCACCGG TGAGGCAACA GGAGTCTCAG
   151921 GGTCTCCAGG CTGGGGCAGG CATGTTGTGG CCTGGCTTAG CGTCCCCCTC TTGGGTATGA
   151981 ACTCCTGCCA GCCTGGCCCA GCACCCGTGA TAGGGAGAGT AGGGGTCTGG GTCTCGGAGC
   152041 ATCTCGTCCA GCTTCCTCAT TTCACAGCTA AGGACCTGGT TCTGGTCTCT GGGGTGTCGA
   152101 CTCGGGCTGC CTCCTCCCAG GGTCCCACCT CACGTCTCCG CCCCCCAATG CCCCAGCTAG
   152161 GACTCTCACT GTGGCCCCAT GGGAGCTATG GGGGGCTCTC CAGCTGCAGG CGTCTGAGAG
   152221 CCCAGGCTTA GCGCCTGCTG TCTCAGGGAG GGTGGAGGGG CTTGGGAGAG CGGAGCGTGG
   152281 CTTGCCGCCG GAGGCTCTGG TCAGCTGCAG TGTTGCATGG CAAAGGCTCC TTGGAATCCG
   152341 AGGAGACTGT GGGCACCTGC GGGTCAGGGC CCACATTCGT GGCCACGCCT ACTGCACCCC
   152401 AGGGTTCTCC AAAGCGAACC ACTATTACTG CTGTGCCCCG CTCAGGCCAT CCCGTCTCCC
   152461 TTACCTCACT CCCTGCCTCA CCCCGTGAGC TCCAAAGCAC GGGCTTATTG CCCCCGGAGC
   152521 CAGCAGCTGC CCTGCCCACA GGGGTGCCAG CACCCTTGGA ACCAGCAGCA GAAACTCATT
   152581 TCCAAGGAAC ACTTCACACA GAGGTGGGCC AGACGGGGGT GGGGGCGCCG GCTGCCACCT
   152641 GCTCTCCGCC ATCACTCCAG TGCTACCGGT CGTCTGCAGT GAAGACCCCT GGCCTCCAGG
   152701 GGGACCGGCC GCCCTCAGCC CCAGTTTGCA GCCTGGTGCC TCCGTTGCTT GTGCACTGAA
   152761 TGCCCTCCCT TCCTCACTCC CGGGAGCCCC ACACAGCGCC TTCTAGGACG CACTCCCTGA
   152821 GGCCCTGACG CCAAGGAAGG CCCCTCTGCA TCAGCCTAGG CCCTGAACAC CGCTCCTCCT
   152881 GGTCCCGTGT CCCCAGCAGC TTCTGGGCAG CTGCACCAAG CTCCGTGTTC TTTGGGGCCA
   152941 GCAGCCTGGA GGCCACTCGG GGCATGTCCA CTCTGGACAG CCTAGCAGCC TAGGTCCCTC
   153001 CAGGCCTCTC TCGTCCCCTC CAGGCTTGTC CCACTGCCCT CTCCCCCAGC CTGTGACCCC
   153061 TGCCCGAAGG CCTGCTTCCC CTGGGAGCCT GACCCAAGGG GCTCTGGAGG CAAGTGCTTG
   153121 TGGCTCCCCT TCTGGGCCTC AGTTTTCCCC ATCGATGAAA TGAAGGGGTT CCCCAAACGT
   153181 CTTTCCTCCA TGTTCCCTAA CCGCGGACCC ATCCCCGTCA GCCTCAGCAG CATGGGCACA
   153241 GCGATTGCCG GGGATGCTGA AAGTGTCAGC AGGGTCTGCG CCTGCACTAG GGTCTTAATA
   153301 TTATCTGGGG GGCTCCGTGG ACCCCAGAGC TCAGGACGAT GCCAGCGTTT CTGGGCCAGT
   153361 GAGCTCCTCC TTGATGCTTT TCCCCACTCC ACACCCGGTG CTGGCCCCCA GGATGGGGCT
   153421 TCGTGAGGCT CTCCTGCCAC TCAGCCCTTC TTCCCAGTTG AGCCAAGCCA GCTTCCAGCC
   153481 CTGCAGGCCT CACAGCAAGA ATTACAGAAT GAGCTGGAAA GGTGGGTGCA TAGTAAGGCT
   153541 CCATGAGCCG CTTCTGCCAG ACTCACCCTC CTGGTTGAGT GAGTGCGTCT CCCTTTCTGT
   153601 GTTTGAAGCC CACGTAAGAG GGAAAAAAAA GAGGCCAGTT TTCATAAGCT GGCTGTGTCC
   153661 CCTCGCTCCT GGAGCCTTGG CTGCCATCCA GGGACAGCAG GGTACTCTCG CGGGTCCACC
   153721 CCCCAGACAG GGCTCCCAAT CCCAAAGCTA CAAATGGGAA GTCTCGTGAG TGCGACCCCA
   153781 TGACCGGATT TCTTGCCTAA TTCTGCTCTC GTTTTAGCAG GGGACATATG TCTGGGGCTC
   153841 AAATTCAGAG TATTCCAAAG ATCCCCCAAG AGAAAGCTCC CTGCGGCCAC CCGCTCCACA
   153901 GAAACCCCCA GAGGCATCTT TACACACACA TAACACCCCT CCCCCAACTT TTGTCGCCCA
   153961 CAAGTGGTAG CCTATTCTAA CGCTAGTTTG ACTTTGCTTT TTTTTTTTAA GTCTAGATCA
   154021 GTTGCTTAAG CAGCCCCGGT CAGGACGGCT TGGGCTCGGT CCATCCCTCA GCCCTCAGCC
   154081 GCATGCTGTT GGTGGCCACG CGTGTGGAGG TGTATCTGGA GGATAGGTCC CTAGCACGGT
   154141 GAGTAGGTCA AAATCGGTGC AGTGACCAGA AGTCCCCCCT AGAGGGGGCG TCTGGAGCCC
   154201 GGGGCCTCCC CACCTGTGCC ATTCCTGGTA CCTTTTCGGG AAAGCAAGTC CACTCCTCCA
   154261 GCCCGTTTCC CCACTGAGTG GTTTGTTGTG TTCAAGCTCT TTGTGTATCA GAGAAGCTAA
   154321 CTCTTTGCTG GGAGTTGCAA ATGTTTTCCC CAGCTTGGGC CCGGACCTCG GCCGGCCAGA
   154381 GCACCACGGG GATGAAGCCC TATCGGGCCA CAGTGATGCT GCCAGCAGTG GAGAGGTGTC
   154441 TCCCCAAAGT CCACAACTAT CAACTTAGCT TGTAAGTTAG GGCGTCTGGT GGCAGCCAGG
   154501 CCCCCGCCCC CATCCTCCCC AAAGAGCTTC TTCCCACCAC TGCTAGCTCA GTGGGGGATG
   154561 GCAGGGCGAT GCCTGCCTGA ATTGTTACTT TAACTCATGA CCTTCAAAGG TGGTATGAAG
   154621 TTCGCTGTGG CTTTGCTGAA AAGTAGACCT GGCTGGTCAA AAAGCACTGT GACGGGCACT
   154681 TCCCTGGTGG TCAGTGGTTA AGACTCTGCA CTTCCAACAC GGGGGCGGGG GGCGAGGGTC
   154741 CGATCCCTAG TAGGCAATGA GGCAACAGGA CTGCCACCCA CGAGAAAAGC GCGTGGACTC
   154801 TGCCGGGGTC TGCCAGTGCT TCCCCAGGAG AAGCCCAGCT TCAGGGAGTG AGCCTCTCCT
   154861 CCTTTGCTCT CTGATAATTT GGAGGATACT TTTCTTGATT CTAAAATAAG CCCATATTGT
   154921 CTTTGTTCAG GCAGAAGTGG AAAGACCCTT TGGGTTTCAA GCCTATAAAG TTCTAGTGAG
   154981 CCCCCAGTCT TCTGCTCCAG AAGTGGGTCT GAGGGGAAGG GGCAGGTACC GACGCCCTCC
   155041 AGGGAGGCGC ATGGCTTCAG AGAAGAACAC AAGTGACCCT GCAGCCAGCA CCAGCGTTTG
   155101 GGGTGGGGCT GCCCAGGCGG CCCTGCCCCC CAGGAAGCAG GCCGTCCAGT AGCAAAGGGC
   155161 TGATTCCTCG CTGAGTGGCT GGCTGCCAGT CAGAACAAAA CGCAGCGACG AAGCCGACAG
   155221 GCAAGTGCAG GTTCTACCGC CATCCCGCGT GTAGACAAGG GTGAGGGGCC TGGTGATCGT
   155281 GGGGGGGTAA AGAAGGACAC GAACGGCGGT CACAGCCCTT GTCCTGTTAC GTCAACAACC
   155341 CATGTTTACC AGACAAGCAA AATAAAGAAC GCTGAGGTAT AGTGAATGTT GGCGCAGAAA
   155401 CAGACACTTT CCAGAACAGG CTGTGACTTC ACAGACACCA CGCCGAACGT GGCTTCAAAC
   155461 ACGTGGAAGA GGCGAGACGA GAGGTGGCGA CGAGGGAGAC AAGCAGCAAT TGCTGAGCTC
   155521 ACCGCTCACA TCCGGGAAGG AAGCAGAGAT GCGCTGAACT CCACAGAGAA AACGAAGACC
   155581 CACCCGGGGG GCCACTGAAG GGCCCCATAG TGTCTTCACT TCCCCCCAGT CTGCCCCACG
   155641 ATTCCACACA GCCCCAGGAG ATATTCCCAC ACACTTGGGG TGGGATTTGA TCACCAAATT
   155701 CTAACGTTTG TGAGAATCCA AAGGGTCAGG AGGAGCCAAA ACATTTTCAA GGCGGGGGAC
   155761 CTGCTTCGAT GTCAAGATTT CTTATCAAGC GCCGTAAGTG AGGCGAAGTG AATCAGCGCA
   155821 GGGCAGAAAC CTGCACACAC CTGTGGGCCC GATGCAGGAT CAGGCAGAGG GGAACAAAAT
   155881 CCGTGTGCGG GAAGCCCAGG TCAGCGAGCC GCCAGGGCCT CCGCACGCCA AAAAAAAAAA
   155941 TAAAACAGCG AATTAAAGAC ACACAGGTCA CAGAAGAGCG TATCACCTTC ACGACTGCTT
   156001 CAGTGAGGTG CAGAAAGCAC AGATGACTAA GGAGAGCTGG ACACGTTTGA TCTGATTAGT
   156061 CAGATACCAC GACGGGTCAA AAGACGTGCG GTGAGAGGCT CACATTCAGA TATCAAAAAC
   156121 AACACAAAAA ACTCTTTTAT AAATTTGTGA CAGACTAACC AACAAAAAAT TAGCAAAGGA
   156181 CTTAATAAGC CTCTTCACAA ATGGAATAGC CAGTGGCAAA GATGTTCGGC TTAAAGATGA
   156241 GGGAAAGGCA GTTAAGGCAC CACAAGCTGC CACTCCTACC CGTCCCGTCG GCGGTAATGA
   156301 AGCCACTGCA GCTCCCCGCC CAGGTGCCGA CCCCATAGAA ACCTGGAGAC CACCCAACAG
   156361 CCATCGAGAA GGGAATGGAT AAATAAAGCG TGACACATTC CTGGCACCCA ACATGTACGG
   156421 CCGGGCAGCG CCGTGGGCAA GCCGCAGGGA CACGCGCCAC CGTGGGCCCG GCCCTTTCGG
   156481 GCGCTTACAG GTCCCAGCCA GCGAGCCGCA ACCAGCTTGT TCAGAGCCCT GCCGAGGCGC
   156541 TCGGACCCTG AGGAAGGCCG GGCCAGGCTT CCTCTCCCAG GGGACAGCGG GACAGCCCAC
   156601 CACGGTGAGG CTGGCGGTGA CCGCGGTGGA GCGGGGCTGT GGAGACCTCG TCTCTCACTC
   156661 TTGTTACGAG TGTCTGCGTT GCACTTGTTC AAGTTCTACG CATTTTTCTG TGTGTATGTA
   156721 TGTGGTGTGT GTGGCCACCC CCCACACATA CACAGAAAGG AAGTCAGGGA AGGCCAGGAA
   156781 GACCGCCACG TGCCGTGCGT GTGGGCCCCC CGGCCCCTAC CCCTCGGAGG CCTTGCCTGA
   156841 CGAGGTCTGT CCCCCAGCTG CCTCCTCCCA AGCCTAGCTC TGGCCTCCCT GAGCGCCCAG
   156901 CCGCTGCGGG CCTGCGGAGG TGGGGCGTGG TCCCTGTGGG GTGCGTCTAT CCCACAGCAC
   156961 CCCCCCACCA CCCCCCTCCA CCTGCCGGCG TGACCCTCTG GGCTCCATGT GCTCAGCCCG
   157021 CCTTGTGGCA CGTGCTGGGA CCCCCACAAT ATGGCTGAAG TCCCCCAAAA TGGAATTGGA
   157081 AGAAAGCAGT GGTCTACGCA GGCTCCTCGA GCCCACCGTC TTGCACACTG GCGTCAAGCT
   157141 TTGAGCAGAC CCCAGTGGAC CCCACACAGG AGCCCAGGTG AGGTCTGAGG CTGTGGGAAT
   157201 GGATGCCAGG GGCCTCGGGG ACTGGGTGCG AGCCACACCT TGGCAGTGCC CTAGCTGATG
   157261 CCCAGGCTGT GAGGTCTTTG ATGGGGGGGC GCTCCACCAG CCACGCAGCA GGGTCCTCAT
   157321 GGGTGGGTGG GTTTGTGAGC CGTCAGAGGC CTCGCTGGGG CTCCAGAGAG CTTCTGGGTG
   157381 GGGGTGGGGT TCTCCAGGGT CAGTTTACAA GGAGGTGCTG GCCCCCCAAG TTTGCCGTCA
   157441 GAAGAGGGAC CATGGAGGGC CCGCCTACAC CTTCCAGAAC ATTCCCAGGT GAGGTCTGGC
   157501 CCCTGGAGCT GGGAGCCCAG CCGGCCCGCC AGTGGGAGGT ATGGGGTTGT GAACTCACAG
   157561 CAACATCACC GGCAGAGAAG AGGGGCTGAG ACAGAAAAAC AATTCAGGAG GTCATTGCCC
   157621 ACCAGAGGCT GGCACAGCAA GCAGAGGGGC GCACGGGAGC CAGCGGGCGG GGGGACAGAG
   157681 CGGTTTGAAA AGCCCGCCCT GGTCTCACGC TCAAAACAGG AGCAGCGGAA GAAGGAGAAA
   157741 GAGGGGTGTC CTCAAAGGAC CATGAGGACA GGCTGGGACA GTCAGAGACA GGCTGGGCAG
   157801 AGACGCAAGG CAGCGAGCAG CCAGGCCCAC AGAGCACCCG GGTCAGCGGT GCTCCCTGAG
   157861 GTGGGGGAAC CCAGGGCCGA GGCTGGGGAC GCGGCCGGCC CCCTGGAGCT GGGCGGCGCA
   157921 GTACGCCGGT GGGCAGGGTC TCTGTGAGAG AGGCTGGGGA GGAGCCGGGC AAGCTGGGCA
   157981 AGCTCCTCGA CAGGAGATGG GCAAGCAGCA CTGAGAAGCT CTGGGTGCAC GGGATGGGCT
   158041 GGCAAGACTA GGGGAGGGGT CCCAACACAG GCGTGAGGCC TCGGGCAGGC CCGGCTGGAG
   158101 GCCAGTGGGA GGGGCTGGCC CGGTTCTGGG GTGGAGCCCT GGGGCTGTCT CAGCGGCGGA
   158161 TGCTGTGACC ACGCTGGCCT CAGCAGTGTT TCTTTCTCTT GCCTAGGAGA GCCCAGGGGA
   158221 CAACATCTAG AGGAATATGT CAGAAGTGCT TAAATGTTTG GGCCAGGAAG CCACAAGAAA
   158281 GGGCCAGGAG GAGGGAAGTC CCTGGAATCC AATAAGAGCG GCCGGCCTCT GTGCGGTGAG
   158341 GAGCCGGCCA GGTGTGCCCG CTGGACGACG GCCCCCATGT GCCCTGCCCT CAGCAGAGGA
   158401 ATCCGCTCCG GGTGGGCGAT GGACACTGGG CGGAGCTCAG TCAGGGGTGG CTGGAGGGAA
   158461 ACGGCAAGTA CAAGGCTCCG AAAATCTTGG AAGGAGGAAG TTATCACAAA TGAGCTCCAA
   158521 AGGCTGGGCC ACCCACAGGG TAGGGTTATG AGCAGGCAGG AGTGGCTCGA ATGGACTCAG
   158581 AGGAGGCTGA AGGCAAAGAG GCTCCGGGCC TGGCCCCGTG CGTGCCCGCG GGGCTGAGCT
   158641 CACCCTCTGC TGGGGCAGGA CCCCCAGGGG TGGGGCTGGG CCGGCATGCT CCTTCCTGCC
   158701 CACTTTCTGT CCATTTCCAG CCAGACCTTG AGCCAGCAGG AAGAGGGGTC CACACGGGGC
   158761 TCAGCACAGC GGATTCTGAG GCCACGAGCA GCCCGCAGGC CGGCGGGTGG CAGGCGGGGC
   158821 ACACGCGACA GGCTGGGACC GTGCCGAGGA GTGGAGACAG CCCGGGAGCC CTGCAGGTGG
   158881 CTGCACATCA CAGTCCCTGG ACGAGGAGCA CTCGGCCACC AGGCTCCCTG GGAAAGGCTT
   158941 TGGGCCTTAA TCCCCCTGAC CTTCGATTTT CCATTTTTCT TTCTTTGAAC TTTAACCTAA
   159001 AAGGGCAAAG CAATTTAATT TTTTGATTTG CATTTCACCC TAGGAAATTC AGGACAGAAG
   159061 GTCTGTTTCC AGGCTGACCC TTTAATGGGA GCATCTCTGT TGTTTCGTCT CCTTGCAGAA
   159121 CCTCTGAGCC AAATTTGGAC TCTGAGGTTG GACCTAATTC AGGATGGGAA AGGGCAGGGA
   159181 GAGAGTTCCG GGTCTGGGGT CCAAGGTGTC CTGAGAGTTC ACTGATGTGG GTTCCGGCCC
   159241 ATCGTGAGGT GGCTGATGTG GGAGGCTCTA TAAGCCGCCC GCGGCCCGCA TAGGGGGACG
   159301 AGTAGATTTG GGGCCTGCCC CCACCCCTGG GAAACGGCTG AGGCGCCCGG TGGCCCCTGC
   159361 CCTCGCATCA CATCCGCCCG CCACTCTGCT CGGGGAGCAG CAGCTGTATC GCTGACCCAT
   159421 GAACTTGGGA GGACAGAGTG GGCAGCTTCC ATCCGTCCGG CTCCCTCAGC CTCTCTGGGG
   159481 ACCTGGCCCG CCCTGCCACG CAGGTGCCCG CGGCCCTCCT CGCTCCCGTT GGGGCTGAAG
   159541 CGGAGCAAAC TGCCCGGCAG GTGAGGGTCT CTGGCAAGTG CCCCAGGCCC CAGGCCGGCT
   159601 GCTGACCGGT CCTCCCGCCG CCTCGCCATG CCCCCCCACC CCCTGGCTTC CTCCTCCTCC
   159661 TCCATGCTGT ACCGCCCCTC TGACCACTGT TGCCCACTCA ACCCGTTGTG ACCCGTTTTC
   159721 TCTGCTGGAG ATGAACCCTA AACTCTCACT TCAAGTCAGC TTGTTTGGTT TCTTAAAGGG
   159781 GTCTCTCTGT GCACACCGAC AGAGGCGAGT GTGTTCAGAT CGCAGAGGCG ACAGGGAGCA
   159841 GGGCAGGATC AGAGGGGCTA GCGCCAGGTA CCAGGTGCAG GAAGACCATC CATGGGGGTG
   159901 GGCAGCAAGC CGGCCCTGTG CCCACCCCAC TGGGGTCCAC CAGCCCTGCC CCGCAGCCCC
   159961 CTGTGGAGGT GGCCCCTGCT CCTCACGGCC CGGTCGGGCC CCACAGCTGC CCGATCACCG
   160021 CTGTGCCGAC TGTCGGGCCC CAGCCTCTGC AGCCCCCGGA GCTATGCCAC TACAGCAGCC
   160081 CCTCTGTTTT CCAGGCTTTT CCCGCAGCCT GGGGTGCTGC CCCCCCGCCC CCGAGCTCGG
   160141 GCCAGGGCTC TGGTGGGCAG CACAGCTGCT GCTCCGCCTA AGGCAGGCTC AGCTTTGAGT
   160201 AAAGGCCCGA GCGGCTTCCC CTCCCAGGCA AGGCCCCCGG GGCCTGTGTC TGAGGCCCTC
   160261 CGGGCTCCTG TCCCCCTTAG CCAGAGGCTC CGCAGCGTGA GTGGCCTTTC CCAATTTCCC
   160321 AAGCAATTTC CCCCGGACGC TACCTCGTGT TATCCTCACA ACAACCCTGT GAGGGAGGGA
   160381 CTAGCGGCCT TACTTTCAAG GGGAAACTGA GGCCCAGAGA GGTAACGTAG GCGGCCTCCC
   160441 CCATGTCACA CAGCAAGTCA GCGAGAGGAC CGGTGCCTCT TCTCACCCCC CGGCCCTCCC
   160501 CCCACCCCCG CCCCAGCCAA GGCCCACTCG CTTTTCTTCC CAGTTTTCTT CTTCTACACT
   160561 TCCCCTCCCA TATCCCTCCC CCAGCCCCCT CCCCCCCATC CCCCCACCCG CCCCCCGCAG
   160621 TGGACAGAGA GGTGGGACCT GAATGAGTCC TCCCACCCTT CTGTCCTCAG GAAGCGGCCT
   160681 GCGGCACAAG GATCAGCTTG ACCAAGGCTA CGTGTGGACA GGGCGGGGAG GGCCCCCAGG
   160741 AGAACTCTGC TCAGGGCCAA GGACCCTCCC CTTGTCCAGA GGAGGGCTTT GTGGGGGGGC
   160801 GCCCACAAAC CCAGGAACCT CCCTGCTGTG TGTGCTGGAG GACGGCGGCG GGAGTCGGGG
   160861 GGCAGGAGAA GGACCTGGTG CGACCCCACC AAACGAACGA GGCAAAATTA GAGTGAACTG
   160921 GTGGCTTGGC AGTGCTCAAA GGTGCCCGCC CATCTTCCCT TGAATTCCGC G
//
